# Supplementary material for: Relationship between general practice capitation funding and the quality of primary care in England: a cross-sectional, 3-year study
Source: PubMed Central journal article supplement (PMC6858150; doi:10.1136/bmjopen-2019-030624), 2019-11-07
Supplement: bmjopen-2019-030624.draft_revisions.pdf [file bmjopen-2019-030624.draft_revisions.pdf]

# BMJ Open

BMJ Open is committed to open peer review. As part of this commitment we make the peer review history of every article we publish publicly available.

When an article is published we post the peer reviewers' comments and the authors' responses online. We also post the versions of the paper that were used during peer review. These are the versions that the peer review comments apply to.

The versions of the paper that follow are the versions that were submitted during the peer review process. They are not the versions of record or the final published versions. They should not be cited or distributed as the published version of this manuscript.

BMJ Open is an open access journal and the full, final, typeset and author-corrected version of record of the manuscript is available on our site with no access controls, subscription charges or pay-per-view fees (<http://bmjopen.bmj.com>).

If you have any questions on BMJ Open's open peer review process please email [info.bmjopen@bmj.com](mailto:info.bmjopen@bmj.com)

# BMJ Open

## The relationship between general practice funding and the quality of primary care in England

|                               |                                                                                                                                                                                                                                                                                                                                                                                                                                                         |
|-------------------------------|---------------------------------------------------------------------------------------------------------------------------------------------------------------------------------------------------------------------------------------------------------------------------------------------------------------------------------------------------------------------------------------------------------------------------------------------------------|
| Journal:                      | <i>BMJ Open</i>                                                                                                                                                                                                                                                                                                                                                                                                                                         |
| Manuscript ID                 | bmjopen-2019-030624                                                                                                                                                                                                                                                                                                                                                                                                                                     |
| Article Type:                 | Research                                                                                                                                                                                                                                                                                                                                                                                                                                                |
| Date Submitted by the Author: | 22-Mar-2019                                                                                                                                                                                                                                                                                                                                                                                                                                             |
| Complete List of Authors:     | L'Esperance, Veline; King's College London, UK, School of Population Health and Environmental Sciences<br>Gravelle, Hugh; University of York, Centre for Health Economics<br>Schofield, Peter; King's College London, UK, School of Population Health and Environmental Sciences<br>Santos, Rita; University of York, Centre for Health Economics<br>Asthworth, Mark; King's College London, UK, School of Population Health and Environmental Sciences |
| Keywords:                     | PRIMARY CARE, Quality in health care < HEALTH SERVICES ADMINISTRATION & MANAGEMENT, HEALTH ECONOMICS, Health inequalities                                                                                                                                                                                                                                                                                                                               |
|                               |                                                                                                                                                                                                                                                                                                                                                                                                                                                         |

SCHOLARONE™  
Manuscripts

**Title:****The relationship between general practice funding and the quality of primary care in England****Authors:**

Veline L'Esperance<sup>1</sup>, Hugh Gravelle<sup>2</sup>, Peter Schofield<sup>3</sup>, Rita Santos<sup>4</sup>, Mark Ashworth<sup>5</sup>

1. Doctoral Research Fellow, School of Population Health & Environmental Sciences, Kings College London, London, UK
  2. Professor of Economics, Centre for Health Economics, University of York, York, UK
  3. Wolfson Lecturer, School of Population Health & Environmental Sciences, Kings College London, London, UK
  4. Research Fellow, Centre for Health Economics, University of York, York, UK
  5. Reader in Primary Care, School of Population Health & Environmental Sciences, Kings College London, London, UK
- Corresponding author email: mark.ashworth@kcl.ac.uk

**Abstract:**

**Objective** To explore the relationship between general practice funding and quality ratings based on general practice quality inspections.

**Design** Cross-sectional study pooling three years of primary care administrative data.

**Setting** UK primary care.

**Participants** 7310 practices (95% of all practices) in England which underwent Care Quality Commission (CQC) inspections between November 2014 and December 2017.

**Main outcome measures** CQC ratings. Ordered logistic regression methods were used to predict the relationship between practice capitation funding and CQC ratings in each of 5 domains of quality: caring, effective, responsive, safe and well-led, together with an overall practice rating.

**Results** Higher funding was significantly associated with higher CQC ratings across all five quality domains; caring (odds ratio [OR] 1.93, 95% confidence interval [CI]: 1.27 to 2.95); effective (OR 1.46, 95% CI: 1.01 to 2.12); responsive (OR 1.57, 95%CI : 1.10 to 2.24); safe

1  
2  
3 (OR 1.72, 95% CI: 1.24 to 2.38); well-led (OR 1.81, 95% CI: 1.38 to 2.54); and overall rating  
4  
5 (OR 1.85, 95% CI: 1.36 to 2.50).  
6  
7

8 **Conclusion:** Higher capitation funding per patient was consistently associated with higher  
9  
10 ratings across all CQC domains and in the overall practice rating. This study suggests that  
11  
12 measured dimensions of the quality of care are related to the underlying funding allocated  
13  
14 to each general practice, implying that additional funding may be associated with higher  
15  
16 levels of primary care quality.  
17  
18  
19

### 20 21 22 **Strengths and limitations**

- 23 • A cross-sectional study covering three years of primary care data
- 24  
25 • The definition of primary care quality used in this study was multidimensional,  
26  
27 based on inspection findings and covering patient safety, patient experience, clinical  
28  
29 effectiveness.  
30  
31
- 32 • The association between the achievement of quality ratings and practice funding  
33  
34 was explored, adjusted for known confounders  
35  
36
- 37 • Although based on a near complete sample of general practices in England, bias may  
38  
39 have been introduced by data coding and recording errors  
40  
41  
42
- 43 • Longer term and prospective studies are required to strengthen causal inferences  
44  
45  
46  
47  
48  
49  
50  
51  
52  
53  
54  
55  
56  
57  
58  
59  
60

## Introduction

Improving the quality of care is a major focus of UK government health policy(1). High quality health care has three main components: clinical achievement, patient experience and patient safety(2). There is wide variation between general practices in the achievement of clinical care quality indicators and patient reported satisfaction(3).

It is important to understand whether variations in the quality of care provided across practices are related to variations in their funding. Healthcare quality regulation of healthcare in England is currently undertaken by the Care Quality Commission, focuses on outcomes for patients and has a wide range of enforcement powers, including closure and deregistration of services, if essential standards are not met.(4)

Studies of the relationship between quality and funding in English general practices have largely focussed on the Quality and Outcomes Framework (QOF) which rewards practices for higher quality care, as defined by the achievement of clinical process and outcome targets. The QOF has had limited impact on reducing secondary care costs(5) or improving primary care performance(6, 7). In terms of financial incentivisation, the QOF accounted for approximately 7.8% of funding received by general practices in England in 2016(8). In contrast, capitation payments represent the largest proportion of funding to general practice (54% in 2016) and are related to the number of registered patients in each practice(8), adjusted for factors thought to increase the demand on primary care services(9). Other components of general practice funding include additional payments for postgraduate training, the provision of additional clinical services ('enhanced services') and various

1  
2  
3 reimbursements to cover the costs of premises, computers and for some practices, dispensing  
4 medication(10).  
5  
6  
7  
8  
9

10 Greater capitation spending on general practices has been found to be associated with  
11 reductions in secondary care usage and costs, and increased patient satisfaction(11). Studies  
12 have also shown that leadership within the practice organisation plays a key role in the  
13 delivery of high quality care(12). Until recently, nationally derived metrics of measures of  
14 inspection-based primary care quality were unavailable. Since October 2014 all general  
15 practices have been subjected to inspections by the Care Quality Commission (CQC) (13), (4).  
16 The CQC reports on the extent to which practices are caring, effective, responsive to the needs  
17 of patients, safe, and well-led(4, 14) and also combines these five domains to produce an  
18 overall practice rating. In this study, we assess the relationship of practice capitation funding  
19 with overall CQC ratings and with the individual CQC domains.  
20  
21  
22  
23  
24  
25  
26  
27  
28  
29  
30  
31  
32  
33  
34  
35

## 36 **Methods**

### 37 *Data sources*

38 We linked practice-level data on NHS payments to general practice(15) to CQC inspection  
39 ratings(14), NHS administrative datasets, General and Personal Medical Services Statistics  
40 (16), and small area Census and socio-economic data from Neighbourhood Statistics(17).  
41  
42  
43  
44  
45  
46  
47  
48  
49  
50  
51

### 52 *Care Quality Commission Ratings*

53 CQC ratings are based on publicly available data (such as QOF and General Practice Patient  
54 Survey(18)), practice inspections and interviews with patients and staff(14). We used CQC  
55 ratings for practices with completed CQC reports first inspected between November 2014 and  
56  
57  
58  
59  
60

1  
2  
3 December 2017 (n = 7310, 95% of all practices). For practices which required reinspection  
4  
5 only the first inspection score was included in the analysis. The five domains of quality  
6  
7 described by CQC inspections are summarised in Table 1; each is rated on a 4-point scale.  
8  
9

### 10 11 12 **Practice data**

13  
14 Data for all general practices in England were obtained from the General and Personal Medical  
15  
16 Services database, for 2014/15, 2015/16 and 2016/17 financial years (16). Our use of practice  
17  
18 based demographic data followed a previously used methodology(19). Patient characteristics  
19  
20 included the proportion of patients aged 0 to 4 years, proportion of patients aged 75 years or  
21  
22 older and proportion of nursing home patients. Deprivation data for each general practice was  
23  
24 attributed as the mean of the Index of Multiple Deprivation (IMD) 2015(17) weighted by the  
25  
26 proportion of practice patients resident in each Lower Layer Super Output area (LLSOA).  
27  
28 Neighbourhood ethnicity (proportion Asian or black) derived from the 2011 national census,  
29  
30 was attributed to practices weighted by the proportion of the practice population in each  
31  
32 LLSOA(20). The following practice characteristics were included: region (North, Midlands,  
33  
34 London and South), contract type (General Medical Services or Personal Medical Services),  
35  
36 minimum distance from an acute hospital, dispensing status (whether the practice dispensed as  
37  
38 well as prescribed medication), singlehanded practice status and training practice status. We  
39  
40 did not include practice staffing (GPs, nurses, other staff) as explanatory variables in the model  
41  
42 because staffing is likely to be directly affected by practice funding and so inclusion of these  
43  
44 variable may lead to an underestimate of the full effect of funding. Moreover, a major change  
45  
46 in the way in which staffing data was collected in 2015/16 also means that we would have  
47  
48 had to drop a large number of observations.  
49  
50  
51  
52  
53  
54  
55  
56  
57  
58  
59  
60

### ***Practice funding data***

Practice funding data was available for the financial years 2014/15, 2015/16 and 2016/7(21).

We defined practice funding as the capitation payment per patient for each financial year.

Capitation payments are weighted to reflect factors affecting GP workload (age, gender, patients in nursing and residential homes, small area measures of morbidity), rurality and an index of local staff costs which affect the cost of providing services(9).

### ***Sample***

We linked inspected practices (n=7310) with funding data for their year of inspection. We excluded atypical practices with  $\leq 750$  registered patients (n=10) or  $\leq 500$  patients per FTE GP (n= 8) following a previously used method(22). Practices with recorded negative (n= 2) or zero funding (n = 52) were excluded. The final analysis sample consisted of 7238 practices.

### ***Data Analysis***

Analysis was at GP practice level. Since the CQC rating outcomes are ordered categories we used ordered logistic regression to model the relationship between funding and the practice CQC ratings(23). Separate models were estimated for each domain.

The key explanatory variable was funding per 100 patients. In addition to patient and practice characteristic covariates, the regression models included year effects to allow for inspection year and annual general practice funding uplifts. We accounted for local area effects by adjusting for clustering at Clinical Commissioning Group (CCG) level. Multicollinearity was tested for by calculating the Variance Inflation Factor (VIF) and variables with a value for  $VIF > 5$  were excluded. The proportional odds assumption of the ordered logit model was also tested(24). We report the odds ratio from the estimated models.



1  
2  
3  
4  
5  
6 We also calculated the average marginal effects of funding on the predicted probabilities of  
7  
8 achieving overall ratings of “outstanding” and “inadequate” for all practices. We also compare  
9  
10 the predicted probabilities of an “outstanding” overall rating for training versus non-training  
11  
12 practices, single-handed versus multi-handed practices, and rural versus urban practices.  
13  
14  
15 STATA 14 (StataCorp, College Station, TX) was used for all statistical analyses.  
16  
17

### 18 19 20 ***Patient involvement***

21  
22 Funding for this study included funding of a dedicated patient involvement group. Patients  
23  
24 were involved in developing plans for the study design, approving the outcome measures and  
25  
26 commenting on the potential impact of outcomes. A lay summary was also provided.  
27  
28  
29

### 30 31 **Results**

32  
33 Summary statistics for the main characteristics of the general practices are provided in Table  
34  
35 2. Mean funding per registered patient increased from £77.49 in 2014/5 to £83.17 in 2016/7  
36  
37 (Table 3).  
38  
39  
40

41  
42 The distribution of practice ratings across each quality domain is shown in Figure 1. A total of  
43  
44 79% (n = 5774) of practices achieved an overall rating of ‘Good’, while only 4% (294) achieved  
45  
46 an overall rating of ‘Outstanding’. ‘Inadequate’ ratings varied across the domains, from 1%  
47  
48 (caring domain) to 6% (safety domain), with an ‘Inadequate’ rating of 4% for overall  
49  
50 performance.  
51  
52  
53

54  
55  
56 Figure 2 shows the difference in capitation funding for practices with the lowest quality rating  
57  
58 compared to those with the highest quality rating. In each domain, ‘Inadequate’ practices  
59  
60

1  
2  
3 received less capitation funding; this was significant for three domains (caring, safe, well-led)  
4  
5 and for the overall practice rating.  
6  
7  
8  
9

10 Table 4 reports the odds ratios on funding per 100 patients estimated from four regression  
11 models of overall practice CQC rating. In the first model funding is the only explanatory  
12 variable and remaining models have successive additional explanatory variables: year effects,  
13 patient characteristics, and practice characteristics. The unadjusted model shows an  
14 association between higher capitation funding and higher overall CQC ratings with an odds  
15 ratio (OR) of 1.48 (95% confidence interval (CI): 1.14 to 1.92). Allowing for the year of  
16 inspection increased the OR slightly to 1.55 (95%CI: 1.19 to 2.01). Additional allowance for  
17 patient characteristics (OR 1.73; 95%CI: 1.32 to 2.26) and practice characteristics (OR 1.85;  
18 95%CI: 1.36 to 2.50) further increased the odds ratio.  
19  
20  
21  
22  
23  
24  
25  
26  
27  
28  
29  
30  
31  
32  
33

34 Table 5 reports odds ratios for all the explanatory variables in the overall practice quality  
35 rating model with all the additional explanatory variables. In addition to higher practice  
36 funding, rural practice and training practice status were significantly associated with higher  
37 overall practice ratings. Conversely, lower CQC overall practice rating were associated with  
38 higher levels of deprivation, the proportions of patients from black and Asian ethnicities, and  
39 singlehanded practice status.  
40  
41  
42  
43  
44  
45  
46  
47  
48  
49

50 The odds ratio on capitation funding per 100 patients from the full models for each CQC  
51 domain are shown in Table 6. Higher funding was significantly associated with higher CQC  
52 ratings across all five quality domains.  
53  
54  
55  
56  
57  
58  
59  
60

1  
2  
3 We used the results from the ordered logistic regression models with the full set of explanatory  
4 variables to calculate the probability of achieving an overall practice rating of 'Outstanding' or  
5 'Inadequate'. Figure 3 shows the average predicted probability of achieving the practice rating  
6 for each funding level calculated using actual values of practice non-funding characteristics  
7 (year effects, patient characteristics & practice characteristics). Higher funding was associated  
8 with reduced probability of achieving an 'Inadequate' ratings and increased probability of an  
9 'Outstanding' quality rating.  
10  
11  
12  
13  
14  
15  
16  
17  
18  
19  
20  
21

22 We also compared the probability of achieving an 'Outstanding' rating at different levels of  
23 GP funding for training versus non-training practices (Figure 4), for single-handed versus  
24 group practices (Figure 5), and for rural versus urban practices (Figure 6). At all levels of  
25 funding training practices have higher probabilities than non-training, group practices have  
26 higher probabilities than single handed practices, and rural practices have higher probabilities  
27 than urban practices. In all cases higher capitation funding is associated with higher  
28 probabilities of an 'Outstanding' rating.  
29  
30  
31  
32  
33  
34  
35  
36  
37  
38  
39  
40

### 41 **Sensitivity Analyses**

42  
43 The Brant test(24) assesses the proportional odds assumption that the distance between each  
44 category is equivalent. Four of the variables included in our model (region, proportion of  
45 patients aged 0-4 years, contract type and single-hander status) did not meet the assumption  
46 of proportionality of the odds ratios. However, our variable of interest, capitation funding per  
47 patient, did not violate the proportional odds assumption. A partial proportional odds model  
48 estimated by generalised ordered logistic regression, yielded similar results to our main  
49  
50  
51  
52  
53  
54  
55  
56  
57  
58  
59  
60

1  
2  
3 model: higher funding was significantly associated with increase probability of achieving an  
4  
5 'Outstanding' rating (OR 1.93, 95% CI: 1.23 to 3.06).  
6  
7  
8  
9  
10  
11  
12

### 13 **Discussion**

14  
15 This study has demonstrated that higher capitation funding is associated with significantly  
16  
17 higher overall practice quality ratings and ratings across all individual domains.  
18  
19  
20  
21  
22

23 Practice characteristics such as training practice and group practice status were also  
24  
25 associated with higher quality ratings, representing primary care structures which support  
26  
27 higher quality of care. However, some factors related to the registered practice population,  
28  
29 such as urban location, social deprivation and larger proportions of ethnic minority patients  
30  
31 were negatively associated with the practice quality of care rating. Many of these factors are  
32  
33 already known to be negatively associated with reported patient satisfaction (25) and QOF  
34  
35 achievement (26). Including them in the model led to a stronger association of practice  
36  
37 funding with practice quality rating. The likely reason for this is that practice capitation  
38  
39 funding is positively correlated with patient characteristics which have negative effects on the  
40  
41 quality rating. Thus including these patient characteristics in the model removes a source of  
42  
43 bias from omitted variables which would otherwise tend to underestimate the positive  
44  
45 association of funding with the quality rating.  
46  
47  
48  
49  
50  
51  
52  
53  
54  
55  
56

### 57 **Strengths and weaknesses of the study**

58  
59  
60

1  
2  
3 This is the first study to explore the relationship between practice-level capitation funding  
4 and CQC ratings. We have been able to estimate the probability of achieving higher CQC  
5 ratings with additional funding. A variety of sensitivity analyses included in the methodology  
6 have confirmed the robustness of the ordered logistic regression modelling. These findings  
7 are based on a near complete sample of general practices across England. Using data linkages  
8 from a wide range of sources, and multilevel statistical models, this study has been able to  
9 demonstrate the independent effect of practice funding and practice characteristics on  
10 quality ratings, which might otherwise be confounded in single-level analyses.  
11  
12  
13  
14  
15  
16  
17  
18  
19  
20  
21  
22  
23

24 However, there are several limitations. Routinely collected data are subject to coding and  
25 recording errors. As with all observational studies, significant associations, even if large, may  
26 not be causal. Although a wide range of potential confounders were included in the models,  
27 residual confounding cannot be excluded.  
28  
29  
30  
31  
32  
33  
34  
35

### 36 **Comparison with existing literature**

37  
38 These findings add to those of a previous study which found that increased general practice  
39 funding was associated with reduced emergency hospital admissions and A&E  
40 attendances(11). Further, it has demonstrated that the current capitation funding formula  
41 may contribute to the persistence of the inverse care law with deprived areas experiencing  
42 lower quality of care, as defined by inspection ratings(27). Consistent with our study, others  
43 have found that GP practice funding correlate negatively with healthcare need predictors  
44 such as deprivation and non-white ethnicity(28). Previous studies have also demonstrated  
45 that greater GP workload may be associated with higher levels of social deprivation and with  
46 a higher proportion of Asian patients(29). Similarly, practices with a greater proportion of  
47  
48  
49  
50  
51  
52  
53  
54  
55  
56  
57  
58  
59  
60

1  
2  
3 ethnically diverse patients reported worse patient experience(30). Though rural practice were  
4 more likely to achieve an 'Outstanding' rating, consultation rates and rurality do not appear  
5  
6  
7  
8 to be associated(29).  
9

### 12 **Implications for policy and practice**

14 This work provides further evidence of the association between general practice funding and  
15 the quality of primary care. A causal association is plausible and supports the argument that  
16 increased quality and safety of patient care may be achieved through additional investment.  
17  
18 The recently published NHS Long Term Plan(31) outlines proposals to offer substantial  
19 increases to capitation payment together with an emphasis on inter-practice cooperation  
20 through the formation of primary care networks. Both factors are likely to further influence  
21 the relationship between funding and the quality of primary care and will require further  
22 study. The NHS Long Term Plan also emphasises the importance of collaborations between  
23 the CQC and practices working in local areas implying collective responsibility for improving  
24 the quality of care in localities. Our findings suggest that revisions to the primary care  
25 capitation formula are necessary to ensure that more funding is provided in areas of high  
26 deprivation and ethnic minority populations reduce inequalities in the quality of care.  
27  
28  
29  
30  
31  
32  
33  
34  
35  
36  
37  
38  
39  
40  
41  
42  
43  
44  
45

### 46 **Unanswered questions and future research**

47  
48 Future research should extend these findings to subsequent 3-year cycles of quality  
49 inspection. A longitudinal approach to analysis is likely to provide more accurate inference of  
50 model parameters, better control for the influence of omitted variables and generate more  
51 accurate predictions of quality outcomes. Qualitative study is likely to provide insight into  
52  
53  
54  
55  
56  
57  
58  
59  
60

1  
2  
3 mechanisms underlying the link between better funded practices and higher quality rating  
4  
5 achievement.  
6  
7  
8  
9

## 10 **Conclusion**

11  
12 Higher capitation funding per patient was consistently associated with higher overall and  
13 domain quality ratings yielded by CQC inspections. This study suggests that measured and  
14 inspected dimensions of the quality of care are related to the underlying funding allocated to  
15 each general practice, implying that additional funding may be associated with higher levels  
16 of primary care quality.  
17  
18  
19  
20  
21  
22  
23  
24  
25  
26

## 27 **What is already known on this topic**

- 28 • Few studies on the relationship between capitation funding and quality
- 29 • In England, the QOF has had limited impact on reducing healthcare costs and  
30 improving primary care performance  
31  
32  
33  
34  
35

## 36 **What this study adds**

- 37 • Capitation funding is associated with increased quality ratings across all domains
- 38 • The NHS Long Term Plan calls for increased funding to primary care, therefore it  
39 important to understand how and where this funding should be directed  
40  
41  
42  
43  
44  
45  
46  
47 • Our findings imply that further primary care funding is particularly needed in areas of  
48 high deprivation and ethnic minority populations where funding is insufficient to  
49 support high quality of care.  
50  
51  
52  
53  
54  
55  
56  
57  
58  
59  
60

1  
2  
3 **Contributors:** VL, HG, PS, RS and MA contributed to the idea and design of the study. VL and PS led  
4 on data analysis with statistical advice from HG, RS and MA. VL produced the first draft of the paper;  
5  
6 all co-authors contributed and approved the final draft. VE is the guarantor. The corresponding  
7  
8 author attests that all listed authors meet authorship criteria and that no others meeting the criteria  
9  
10 have been omitted.  
11  
12

13  
14  
15 **Funding:** This work was supported by the National Institute for Health Research (NIHR) who  
16  
17 funded a Doctoral Research Fellowship for VE (reference, DRF-2017-10-132) and for RS  
18  
19 (reference, DRF-2014-07-055). HG and RS were funded by the UK NIHR Policy Research  
20  
21 Programme (Policy Research Unit in the Economics of Health and Social Care Systems: Ref  
22  
23 103/0001). The views expressed are those of the authors and not necessarily those of the  
24  
25 NHS, the National Institute for Health Research, the Department of Health and Social Care or  
26  
27 its arm's length bodies or other UK government departments. The findings presented are  
28  
29 independent from the funders who have had no role in study design, data collection, data  
30  
31 analysis, data interpretation, or writing of the report.  
32  
33  
34  
35

36  
37 **Competing interests:** All authors have completed the ICMJE uniform disclosure form at  
38  
39 [www.icmje.org/coi\\_disclosure.pdf](http://www.icmje.org/coi_disclosure.pdf) and declare: no support from any organisation for the  
40  
41 submitted work; no financial relationships with any organisations that might have an interest  
42  
43 in the submitted work in the previous three years; no other relationships or activities that  
44  
45 could appear to have influenced the submitted work.  
46  
47

48  
49 **Ethical approval:** Ethical approval not required for the use of aggregate practice level data as  
50  
51 included in this study.  
52

53  
54 **Dissemination declaration:** the results have been disseminated to the patient involvement  
55  
56 group involved in study design and commenting on potential impact of outcomes.  
57

58  
59 **Data sharing:** No additional data available.  
60



## Figures and Tables

**Table 1: The five key domains for CQC Inspections**

| Domain            | Description                                                                                                                                                                                                                                  |
|-------------------|----------------------------------------------------------------------------------------------------------------------------------------------------------------------------------------------------------------------------------------------|
| <b>Safe</b>       | Patients are protected from abuse and avoidable harm                                                                                                                                                                                         |
| <b>Effective</b>  | Care, treatment and support achieves good outcomes, helps patients to maintain quality of life and is based on the best available evidence                                                                                                   |
| <b>Caring</b>     | Staff involve and treat patients with compassion, kindness, dignity and respect                                                                                                                                                              |
| <b>Responsive</b> | Services are organised so that they meet patients' needs                                                                                                                                                                                     |
| <b>Well-led</b>   | The leadership, management and governance of the organisation make sure it's providing high-quality care that's based around the individual needs, that it encourages learning and innovation, and that it promotes an open and fair culture |

*Adapted from: CQC. The five key questions we ask(32)*

**Table 2. Characteristics of general practices and their populations in England**

| Variable                                              | Mean | (5th, 95th centiles) |
|-------------------------------------------------------|------|----------------------|
| Patient adjusted Index of Multiple Deprivation, 2015  | 24.5 | 8.2, 46.1            |
| Proportion of patients aged 0 to 4 years (%)          | 5.9  | 3.7, 8.8             |
| Proportion of patients aged 75 years or older (%)     | 7.7  | 2.6, 12.9            |
| Proportion of patients: nursing home residents (%)    | 0.5  | 0, 1.4               |
| Proportion of patients: Asian or black ethnicity (%)  | 13.1 | 0.1, 53.1            |
| List size per full-time equivalent (FTE) GP           | 1950 | 1066, 3315           |
| List size per FTE non-clinical employed staff         | 703  | 392, 1103            |
| List size per FTE nurse                               | 7166 | 2810, 15507          |
| Minimum distance of practice from acute hospital (km) | 3.8  | 0.4, 11.8            |
| Proportion of practices by rurality (%)               |      |                      |
| Urban                                                 | 85.5 |                      |
| Hamlet, village, town & fringe                        | 14.5 |                      |
| Proportion of practices by region (%)                 |      |                      |
| North                                                 | 30.3 |                      |
| Midlands                                              | 29.4 |                      |
| London                                                | 18.0 |                      |
| South                                                 | 22.3 |                      |
| Proportion of practices by contract type (%)          |      |                      |
| General Medical Services                              | 59.4 |                      |
| Personal Medical Services                             | 40.6 |                      |
| Proportion of dispensing practices (%)                | 14.6 |                      |
| Proportion of singlehanded practices (%)              | 13.1 |                      |
| Proportion of training practices (%)                  | 30.4 |                      |

**Table 3: Capitation funding per registered patient for inspected practices**

| Inspection year | N    | Mean  | (5th, 95th centiles) |
|-----------------|------|-------|----------------------|
| 2014/15         | 2232 | 77.49 | 59.54, 99.99         |
| 2015/16         | 3790 | 80.86 | 66.57, 101.66        |
| 2016/17         | 1148 | 83.71 | 67.74, 106.76        |

**Table 4: Association of general practice funding (per 100 patients) with overall practice CQC rating: unadjusted and adjusted regression models**

|                     | Unadjusted | Year effects <sup>1</sup> | Patient characteristics <sup>2</sup> | Practice characteristics <sup>3</sup> |
|---------------------|------------|---------------------------|--------------------------------------|---------------------------------------|
| <b>Odds Ratio</b>   | 1.58**     | 1.55**                    | 1.73***                              | 1.85***                               |
| <b>95% CI</b>       | 1.19, 2.00 | 1.19, 2.01                | 1.32, 2.26                           | 1.36, 2.50                            |
| <b>Observations</b> | 7,168      | 7,168                     | 7,144                                | 7,045                                 |

1. Model has mean practice funding and year effects  
2. As above + patient adjusted deprivation, proportion of patients aged 0 to 4 years, proportion of patients aged ≥75 years, proportion patients black or Asian ethnicity, proportion of nursing home residents  
3. As above + region, minimum distance to hospital, contract type, dispensing status, training practice status, singlehanded  
\*p< 0.05; \*\*p< 0.01; \*\*\*p< 0.001

**Table 5: Association of general practice funding (with overall practice CQC rating: predictor variable in fully adjusted model.**

| Characteristics                                | Odds Ratio | 95% CI     |
|------------------------------------------------|------------|------------|
| Capitation funding (per 100 patients)          | 1.85***    | 1.36, 2.50 |
| Year 2                                         | 0.92       | 0.80, 1.05 |
| Year 3                                         | 0.76**     | 0.64, 0.91 |
| Deprivation                                    | 0.99**     | 0.98, 0.99 |
| Patients aged 0 to 4 years (proportion)        | 1.00       | 0.95, 1.05 |
| Patients aged 75 years or old (proportion)     | 0.99       | 0.96, 1.17 |
| Patients in nursing home (proportion)          | 1.13       | 1.02, 1.26 |
| Patients Asian or black ethnicity (proportion) | 0.99*      | 0.99, 1.00 |
| Region: Midlands <sup>§</sup>                  | 0.64***    | 0.55, 0.76 |
| Region: London <sup>§</sup>                    | 0.56***    | 0.93, 0.98 |
| Region: South <sup>§</sup>                     | 0.48**     | 0.40, 0.58 |
| Minimum distance to hospital                   | 1.00       | 1.00, 1.00 |
| Rurality (Yes/No)                              | 1.50**     | 1.18, 1.92 |
| Contract type (GMS/PMS)                        | 1.08       | 0.96, 1.23 |
| Dispensing Practice status (yes/no)            | 1.10       | 0.88, 1.38 |
| Singlehanded practice (yes/no)                 | 0.53***    | 0.44, 0.63 |
| Training Practice status (yes/no)              | 2.30***    | 1.99, 2.65 |
| *p< 0.05; **p< 0.01; ***p< 0.001               |            |            |

<sup>§</sup> Comparator Region: North

**Table 6: Ordered logistic models: effect of general practice funding on each CQC domain rating**

| Domains    | Odds Ratio | 95% CI     |
|------------|------------|------------|
| Caring     | 1.93**     | 1.27, 2.95 |
| Effective  | 1.46*      | 1.01, 2.12 |
| Responsive | 1.57*      | 1.10, 2.24 |
| Safe       | 1.72*      | 1.24, 2.38 |
| Well-led   | 1.87***    | 1.38, 2.54 |
| Overall    | 1.85***    | 1.36, 2.50 |

Adjusted for year effects, patient characteristics & practice characteristics &  
\*p< 0.05; \*\*p< 0.01; \*\*\*p< 0.001

**Figure 1: Distribution of CQC ratings by each domain**

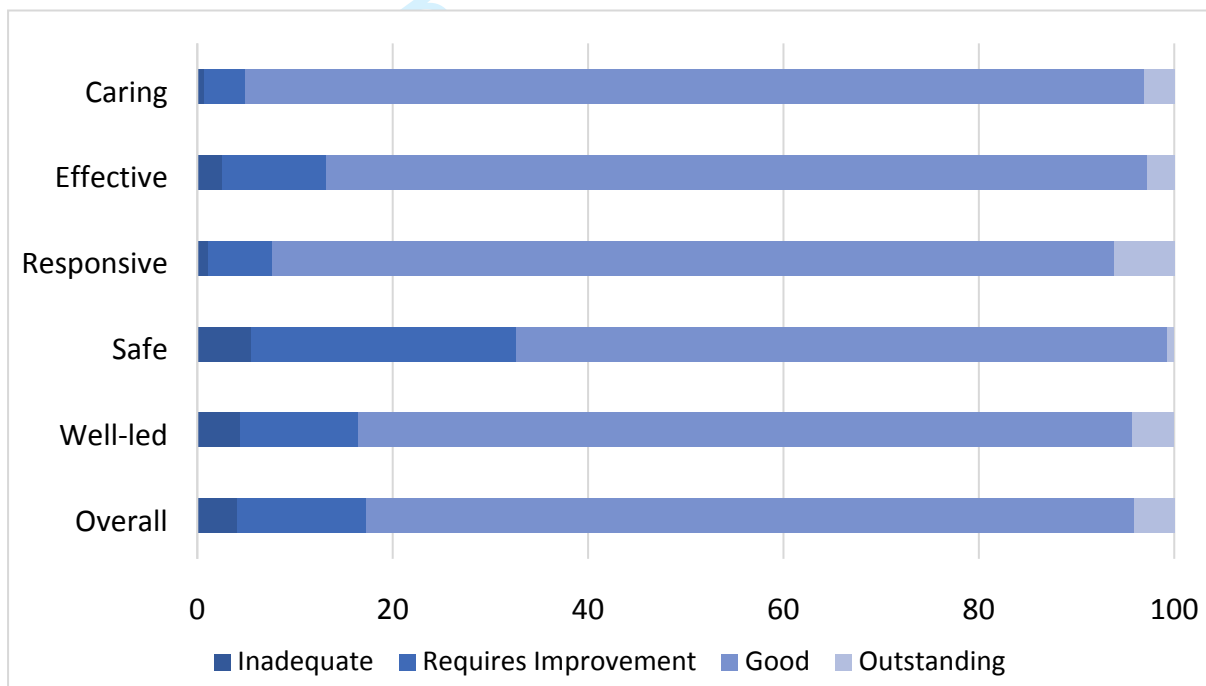

Figure 2: Practice capitation funding by overall practice rating: 'Inadequate' versus 'Outstanding'

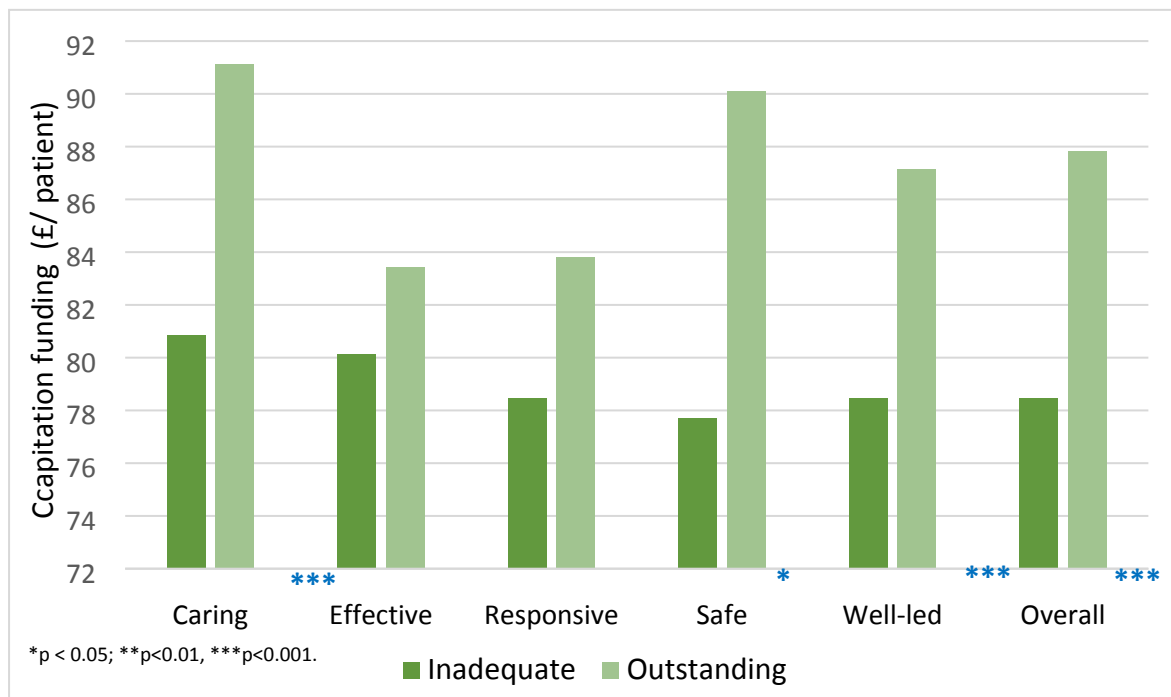

Figure 3: Estimated probability of overall practice rating of 'Inadequate' or 'Outstanding': capitation funding per registered patient

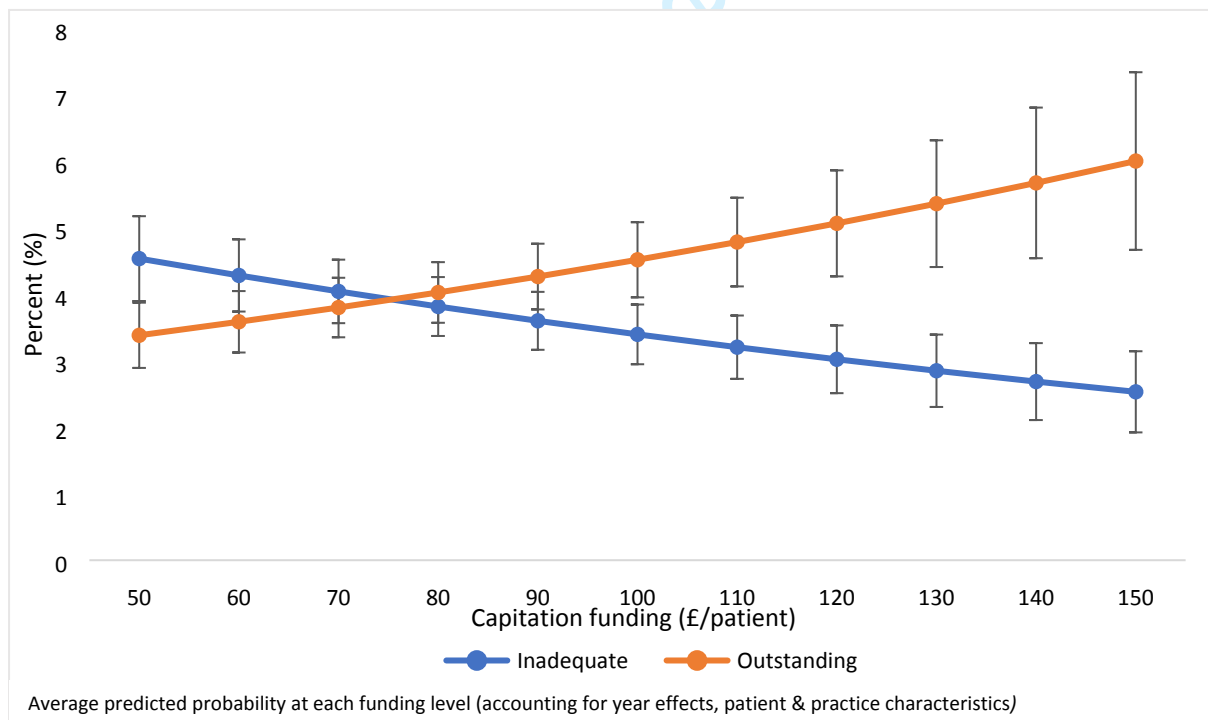

Figure 4: Estimated probability of overall practice CQC ratings of 'Outstanding': training versus non-training practices

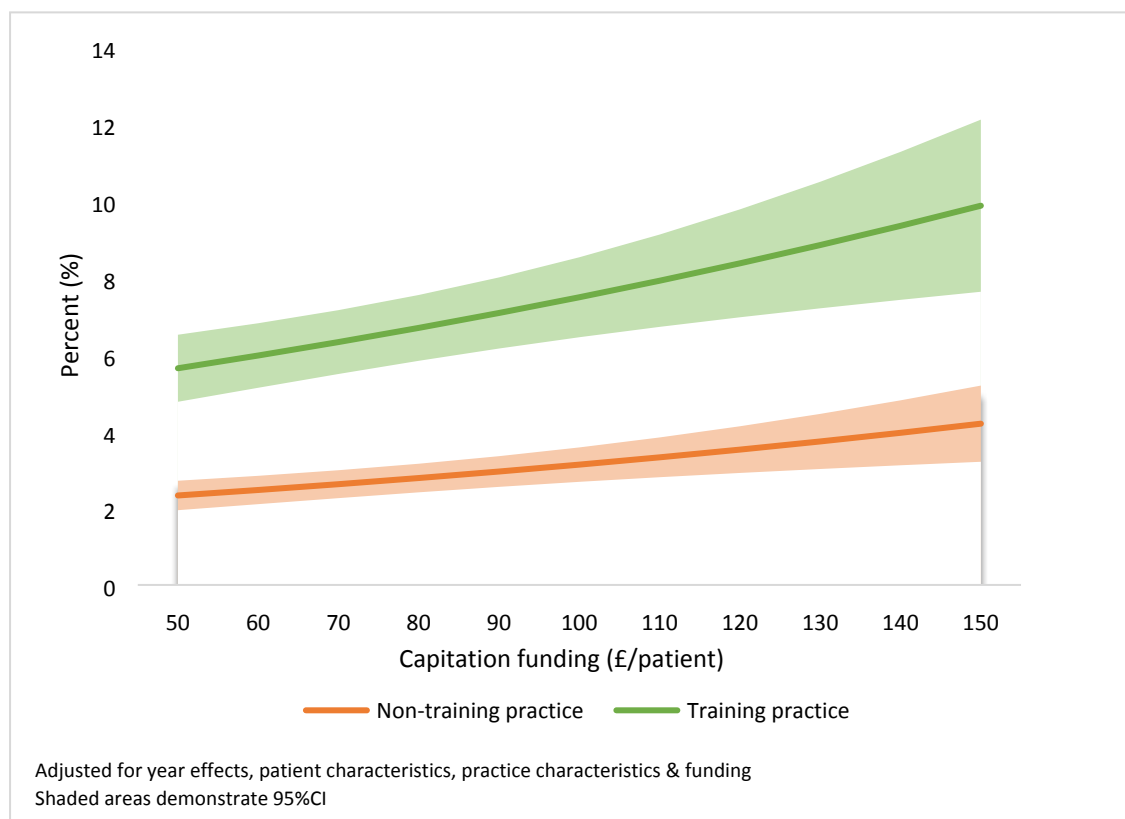

Figure 5: Estimated probability of overall practice CQC ratings of 'Outstanding': group and single-handed versus group practices

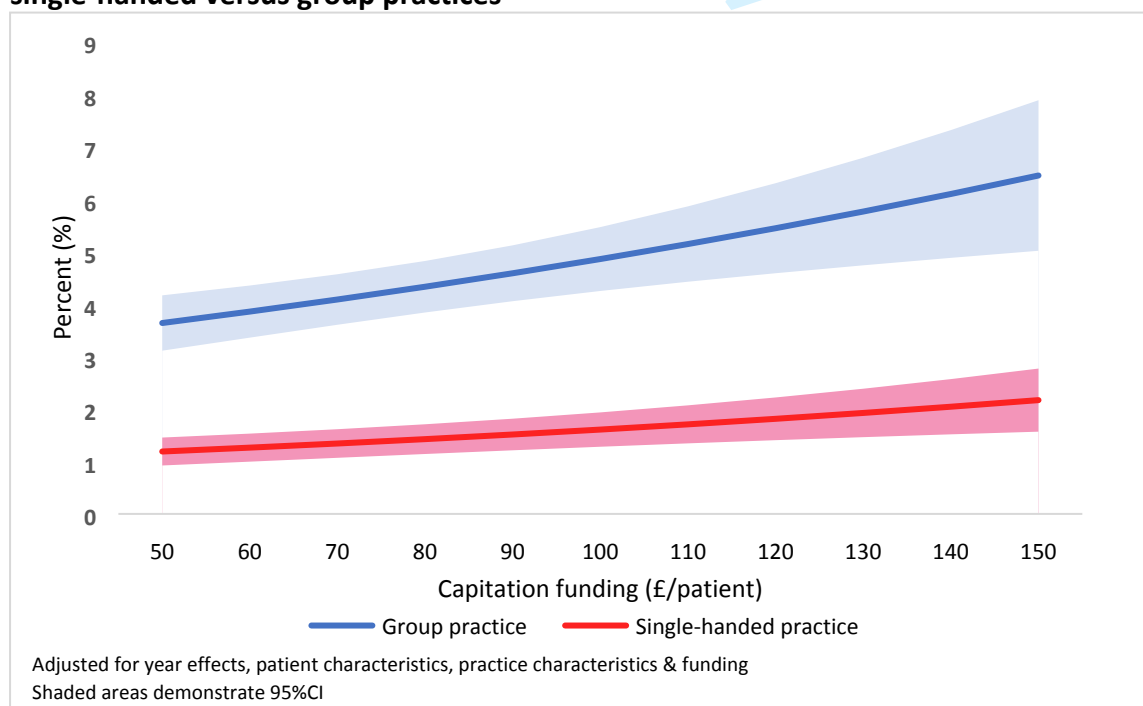

Figure 6: Estimated probability of overall practice CQC ratings of 'Outstanding': rural and urban practices

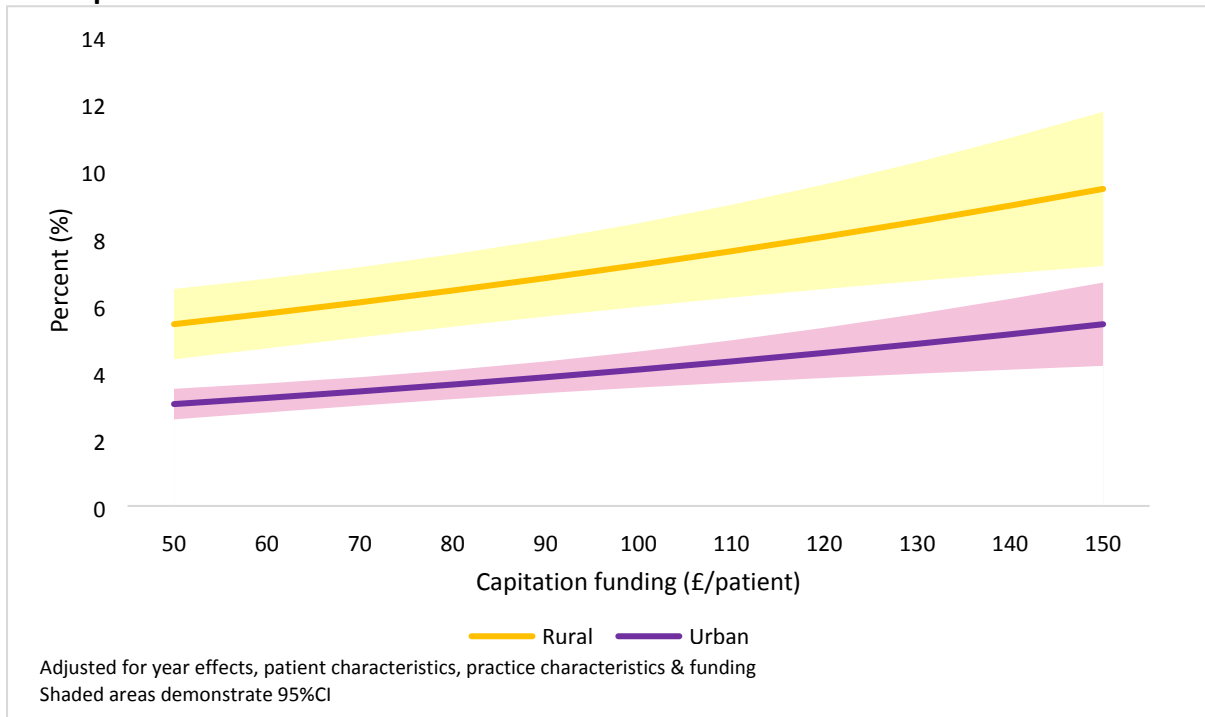

For review only

**Appendix- Table A: Association of general practice funding with overall practice CQC rating: predictor variable in fully adjusted model.**

| Characteristics                                  | Odds Ratio | 95% CI      |
|--------------------------------------------------|------------|-------------|
| Capitation funding (per 100 patients)            | 1.99***    | 1.34, 2.95  |
| Year 2                                           | 1.00       | 0.98, 1.01  |
| Year 3                                           | 0.98       | 0.96, 1.01  |
| Deprivation                                      | 1.00*      | 1.00, 1.00  |
| Patients aged 0 to 4 years (proportion)          | 0.79       | 0.42, 1.47  |
| Patients aged 75 years or old (proportion)       | 0.80       | 0.56, 1.15  |
| Patients in nursing home (proportion)            | 2.27       | 0.47, 11.01 |
| Patients Asian or black ethnicity (proportion)   | 0.94*      | 0.88, 1.00  |
| Region: Midlands <sup>§</sup>                    | 0.97*      | 0.95, 0.99  |
| Region: London <sup>§</sup>                      | 0.95***    | 0.93, 0.98  |
| Region: South <sup>§</sup>                       | 0.93***    | 0.91, 0.96  |
| Minimum distance to hospital                     | 1.00       | 1.00, 1.00  |
| Rurality                                         | 0.96*      | 0.93, 1.01  |
| Contract type (GMS/PMS)                          | 1.01       | 0.99, 1.02  |
| Dispensing Practice status (yes/no)              | 1.01       | 0.98, 1.03  |
| Singlehanded practice (yes/no)                   | 0.95***    | 0.92, 0.97  |
| Training Practice status (yes/no)                | 1.07***    | 1.05, 1.09  |
| List size per Full Time GP (per 100 patients)    | 0.98***    | 0.97, 0.99  |
| List size per Full Time staff (per 100 patients) | 0.97*      | 0.95, 0.99  |
| List size per Full Time Nurse (per 100 patients) | 1.00       | 1.00, 1.00  |

\*p< 0.05; \*\*p< 0.01; \*\*\*p< 0.001

<sup>§</sup> Comparator Region: North



## References:

1. Ham C, Berwick D, Dixon J. Improving quality in the English NHS: A strategy for action. London: The Kings Fund, 2016.
2. Department of Health. High Quality Care for All – NHS Next Stage Review Final Report. London: Department of Health, 2008.
3. Campbell S, Steiner A, Robison J, Weber D, Raven A, Roland M. Is the quality of care in general medical practice improving? Results of a longitudinal observational study. *Br J Gen Pract* 2003;53:298-304.
4. Gillam S, Siriwardena A. Regulation in primary care. *Quality in Primary Care* 2014;22:57–61.
5. Emmert M, Eijkenaar F, Kemter H, Esslinger AS, Schoffski O. Economic evaluation of pay-for-performance in health care: a systematic review. *Eur J Health Econ*. 2012;13:755-67.
6. Kontopantelis E., Springate D. A., Ashworth M., Webb R. T., Buchan I. E., Doran T. Investigating the relationship between quality of primary care and premature mortality in England: a spatial whole-population study. *BMJ*. 2015;350:h904.
7. Campbell SM, Reeves D, Kontopantelis E, Sibbald B, Roland M. Effects of pay for performance on the quality of primary care in England. *NEJM*. 2009;361:368-78.
8. NHS Digital. NHS Payments to General Practice, England, 2016/17. 2017.
9. British Medical Association. Focus on the global sum allocation formula (Carr-Hill Formula): British Medical Association; 2015 [12th April 2016]. Available from: [https://www.google.co.uk/url?sa=t&rct=j&q=&esrc=s&source=web&cd=1&cad=rja&uact=8&ved=0ahUKewi\\_sLK47f\\_OAhWLAMAKHZ2bC8oQFggcMAA&url=https%3A%2F%2Fwww.bma.org.uk%2F%2Fmedia%2Ffiles%2Fpdfs%2Fpractical%2520advice%2520at%2520work%2Fcontracts%2Fgpps%2Ffocus%2520on%2520global%2520sum%2520allocation%2520formula.pdf%3Fla%3Den&usg=AFQjCNEfYEp15cpvpLtT77blobeHfSmGMQ&sig2=ojUD-oKqav9bcLejniNdtw&bvm=bv.131783435,d.d2s](https://www.google.co.uk/url?sa=t&rct=j&q=&esrc=s&source=web&cd=1&cad=rja&uact=8&ved=0ahUKewi_sLK47f_OAhWLAMAKHZ2bC8oQFggcMAA&url=https%3A%2F%2Fwww.bma.org.uk%2F%2Fmedia%2Ffiles%2Fpdfs%2Fpractical%2520advice%2520at%2520work%2Fcontracts%2Fgpps%2Ffocus%2520on%2520global%2520sum%2520allocation%2520formula.pdf%3Fla%3Den&usg=AFQjCNEfYEp15cpvpLtT77blobeHfSmGMQ&sig2=ojUD-oKqav9bcLejniNdtw&bvm=bv.131783435,d.d2s).
10. NHS Digital. General and Personal Medical Services, England: 2005-2015, as at 30 September, Provisional Experimental statistics. NHS Digital, 2016.
11. L'Esperance V, Sutton M, Schofield P, Round T, Malik U, White P, et al. Impact of primary care funding on secondary care utilisation and patient outcomes: a retrospective cross-sectional study of English general practice. *Br J Gen Pract*. 2017(DOI: <https://doi.org/10.3399/bjgp17X693101>).
12. Dunham AH, Dunbar JA, Johnson JK, Fuller J, Morgan M, Ford D. What attributions do Australian high-performing general practices make for their success? Applying the clinical microsystems framework: a qualitative study. *BMJ Open*. 2018;8(4):e020552.
13. Care Quality Commission. The state of care in general practice 2014 to 2017. London: Care Quality Commission, 2017.
14. Care Quality Commission. How CQC monitors, inspects and regulates NHS GP practices. London: Care Quality Commission, 2018.
15. NHS Digital. NHS Payments to General Practice, England: NHS Digital; 2015. Available from: <http://digital.nhs.uk/catalogue/PUB18468/nhspaymentsgp-14-15-ann1.xlsx>.
16. NHS Digital. General and Personal Medical Services: NHS Digital; 2016. Available from: <http://digital.nhs.uk/catalogue/PUB20503>.
17. Department for Communities and Local Government. English indices of deprivation 2015. Department for Communities and Local Government 2015.
18. NHS England. The GP Patient Survey. NHS England, 2015 July 2014 Report No.
19. Ashworth M, White P, Jongsma H, Schofield P, Armstrong D. Antibiotic prescribing and patient satisfaction in primary care in England: cross-sectional analysis of national patient survey data and prescribing data. *Br J Gen Pract*. 2016;66(42).
20. Office for National Statistics. 2011 Census: Office for National Statistics; 2011 [21st January 2016]. Available from: <https://www.ons.gov.uk/census/2011census>.

21. NHS Digital. NHS Payments to General Practice, England, 2013-14: Experimental Statistics – Report. Available from: 2015 [5th Sept 2015]. Available from: <http://www.hscic.gov.uk/catalogue/PUB16847/nhspaymentsgp-13-14-rep.docx>.
22. Ashworth M, Schofield P, Durbaba S, Ahluwalia S. Patient experience and the role of postgraduate GP training: a cross-sectional analysis of national Patient Survey data in England. *Br J Gen Pract*. 2014;64(620):168-77.
23. Lall R, Campbell MJ, Walters SJ, Morgan K. A review of ordinal regression models applied on health-related quality of life assessments. *Stat Methods Med Res*. 2002;11(I):49-67.
24. Brant R. Assessing proportionality in the proportional odds model for ordered logistic regression. *Biometrics*. 1990;46: 1171-8.
25. Roberts MJ, Campbell JL, Abel GA, al et. Understanding high and low patient experience scores in primary care: analysis of patients' survey data for general practices and individual doctors. *BMJ*. 2014;349:g6034.
26. Ashworth M, Armstrong D. The relationship between general practice characteristics and quality of care: a national survey of quality indicators used in the UK Quality and Outcomes Framework, 2004–5. *BMC Fam Pract*. 2006;7:68.
27. McLean G, Guthrie B, Mercer SW, Watt GC. General practice funding underpins the persistence of the inverse care law: cross-sectional study in Scotland. *Br J Gen Pract*. 2015; 65(641):799-805.
28. Levene L, Baker R, Wilson A, Walker N, Boomla K, Bankart M. Population health needs as predictors of variations in NHS practice payments: a cross-sectional study of English general practices in 2013–2014 and 2014–2015. *Br J Gen Pract*. 2016;67(654):e10-e9.
29. Mukhtar TK, Bankhead C, Stevens S, Perera R, Holt TA, Salisbury C, et al. Factors associated with consultation rates in general practice in England, 2013–2014: a cross-sectional study. *Br J Gen Pract* 2018;68(670):e370-e7.
30. Lyratzopoulos G, Elliott M, Barbieri JM, al et. Understanding ethnic and other socio-demographic differences in patient experience of primary care: evidence from the English General Practice Patient Survey. *BMJ Qual Saf*. 2012;21(1):21-9.
31. NHS England. The NHS Long Term Plan. NHS England, 2019.
32. Care Quality Commission. The five key questions we ask: Care Quality Commission; 2016 [12th April 2017]. Available from: <http://www.cqc.org.uk/content/five-key-questions-we-ask>.

## STROBE Statement—checklist of items that should be included in reports of observational studies

|                           | Item No. | Recommendation                                                                                                                                                                                                                                                                                                                                                                                                                                                         | Page No. | Relevant text from manuscript                                                                                            |
|---------------------------|----------|------------------------------------------------------------------------------------------------------------------------------------------------------------------------------------------------------------------------------------------------------------------------------------------------------------------------------------------------------------------------------------------------------------------------------------------------------------------------|----------|--------------------------------------------------------------------------------------------------------------------------|
| <b>Title and abstract</b> | 1        | (a) Indicate the study's design with a commonly used term in the title or the abstract                                                                                                                                                                                                                                                                                                                                                                                 | 1        | "Cross-sectional study"                                                                                                  |
|                           |          | (b) Provide in the abstract an informative and balanced summary of what was done and what was found                                                                                                                                                                                                                                                                                                                                                                    | 1        | Summarised in Abstract:<br>Design, Participants, Main outcome measures, Results                                          |
| <b>Introduction</b>       |          |                                                                                                                                                                                                                                                                                                                                                                                                                                                                        |          |                                                                                                                          |
| Background/rationale      | 2        | Explain the scientific background and rationale for the investigation being reported                                                                                                                                                                                                                                                                                                                                                                                   | 2-3      | The link between measured dimensions of quality and primary care funding data                                            |
| Objectives                | 3        | State specific objectives, including any prespecified hypotheses                                                                                                                                                                                                                                                                                                                                                                                                       | 3        | "we assess the relationship of practice capitation funding with overall CQC ratings and with the individual CQC domains" |
| <b>Methods</b>            |          |                                                                                                                                                                                                                                                                                                                                                                                                                                                                        |          |                                                                                                                          |
| Study design              | 4        | Present key elements of study design early in the paper                                                                                                                                                                                                                                                                                                                                                                                                                | 5        | Presented under 'Sample'.                                                                                                |
| Setting                   | 5        | Describe the setting, locations, and relevant dates, including periods of recruitment, exposure, follow-up, and data collection                                                                                                                                                                                                                                                                                                                                        | 3        | Presented under 'Data Sources'                                                                                           |
| Participants              | 6        | (a) <i>Cohort study</i> —Give the eligibility criteria, and the sources and methods of selection of participants. Describe methods of follow-up<br><i>Case-control study</i> —Give the eligibility criteria, and the sources and methods of case ascertainment and control selection. Give the rationale for the choice of cases and controls<br><i>Cross-sectional study</i> —Give the eligibility criteria, and the sources and methods of selection of participants | 5        | Cross-sectional study: general practice eligibility criteria summarised under 'Sample'                                   |
|                           |          | (b) <i>Cohort study</i> —For matched studies, give matching criteria and number of exposed and unexposed<br><i>Case-control study</i> —For matched studies, give matching criteria and the number of controls per case                                                                                                                                                                                                                                                 |          |                                                                                                                          |

|                              |    |                                                                                                                                                                                      |     |                                                                                                                                                                    |
|------------------------------|----|--------------------------------------------------------------------------------------------------------------------------------------------------------------------------------------|-----|--------------------------------------------------------------------------------------------------------------------------------------------------------------------|
| Variables                    | 7  | Clearly define all outcomes, exposures, predictors, potential confounders, and effect modifiers.<br>Give diagnostic criteria, if applicable                                          | 4/5 | Practice variables summarised under the heading 'practice data'; funding variables summarised under the heading 'practice funding data'                            |
| Data sources/<br>measurement | 8* | For each variable of interest, give sources of data and details of methods of assessment (measurement). Describe comparability of assessment methods if there is more than one group | 3   | All sources of data listed under the heading, 'Data Sources'                                                                                                       |
| Bias                         | 9  | Describe any efforts to address potential sources of bias                                                                                                                            | 4   | The large no. of variables included in our regression model are designed to maximise the explanatory power of the model                                            |
| Study size                   | 10 | Explain how the study size was arrived at                                                                                                                                            | 5   | Included practices represent ALL practices, minus exclusions based on predetermined exclusion criteria. Only lack of data availability restricted the sample size. |

Continued on next page

|                        |     |                                                                                                                                                                                                                                                                                                           |     |                                                                                              |
|------------------------|-----|-----------------------------------------------------------------------------------------------------------------------------------------------------------------------------------------------------------------------------------------------------------------------------------------------------------|-----|----------------------------------------------------------------------------------------------|
| Quantitative variables | 11  | Explain how quantitative variables were handled in the analyses. If applicable, describe which groupings were chosen and why                                                                                                                                                                              | 5/6 | Quantitative variables analysed according to description in section headed, 'Data Analysis'. |
| Statistical methods    | 12  | (a) Describe all statistical methods, including those used to control for confounding                                                                                                                                                                                                                     | 5/6 | Regression modelling – see Data Analysis                                                     |
|                        |     | (b) Describe any methods used to examine subgroups and interactions                                                                                                                                                                                                                                       | 6   | Sub-groups such as 'outstanding' or 'inadequate' practices identified                        |
|                        |     | (c) Explain how missing data were addressed                                                                                                                                                                                                                                                               | 5/6 | Practices excluded if missing data                                                           |
|                        |     | (d) <i>Cohort study</i> —If applicable, explain how loss to follow-up was addressed<br><i>Case-control study</i> —If applicable, explain how matching of cases and controls was addressed<br><i>Cross-sectional study</i> —If applicable, describe analytical methods taking account of sampling strategy | n/a | The study was not a sample                                                                   |
|                        |     | (e) Describe any sensitivity analyses                                                                                                                                                                                                                                                                     | 8   | See heading 'Sensitivity analyses'                                                           |
| <b>Results</b>         |     |                                                                                                                                                                                                                                                                                                           |     |                                                                                              |
| Participants           | 13* | (a) Report numbers of individuals at each stage of study—eg numbers potentially eligible, examined for eligibility, confirmed eligible, included in the study, completing follow-up, and analysed                                                                                                         | 5   | Summarised under 'sample'. 7310 practices in England; 54 excluded.                           |
|                        |     | (b) Give reasons for non-participation at each stage                                                                                                                                                                                                                                                      | n/a | n/a (exclusion criteria stated above)                                                        |
|                        |     | (c) Consider use of a flow diagram                                                                                                                                                                                                                                                                        | n/a | Exclusion criteria summarised on pg5 without use of a Flow diagram                           |
| Descriptive data       | 14* | (a) Give characteristics of study participants (eg demographic, clinical, social) and information on exposures and potential confounders                                                                                                                                                                  | 13  | Table 2 summarises, 'Characteristics of general practices and their populations in England'  |
|                        |     | (b) Indicate number of participants with missing data for each variable of interest                                                                                                                                                                                                                       | n/a | Sample only included those with available data                                               |
|                        |     | (c) <i>Cohort study</i> —Summarise follow-up time (eg, average and total amount)                                                                                                                                                                                                                          | n/a |                                                                                              |
| Outcome data           | 15* | <i>Cohort study</i> —Report numbers of outcome events or summary measures over time                                                                                                                                                                                                                       | n/a |                                                                                              |
|                        |     | <i>Case-control study</i> —Report numbers in each exposure category, or summary measures of exposure                                                                                                                                                                                                      | n/a |                                                                                              |
|                        |     | <i>Cross-sectional study</i> —Report numbers of outcome events or summary measures                                                                                                                                                                                                                        | 13  | Summary measures in Table 2                                                                  |
| Main results           | 16  | (a) Give unadjusted estimates and, if applicable, confounder-adjusted estimates and their precision (eg, 95% confidence interval). Make clear which confounders were adjusted for and why they were included                                                                                              | 14  | Table 4 summarises 'unadjusted' and three levels of 'adjusted' analyses                      |

|                                                                                                                  |     |                                                          |
|------------------------------------------------------------------------------------------------------------------|-----|----------------------------------------------------------|
|                                                                                                                  | 15  | Confounders adjusted for are listed in Table 5           |
| (b) Report category boundaries when continuous variables were categorized                                        | n/a | No categorisation of continual variables                 |
| (c) If relevant, consider translating estimates of relative risk into absolute risk for a meaningful time period | n/a | Absolute financial values are presented in the findings. |

Continued on next page

For peer review only

|                          |    |                                                                                                                                                                            |                       |                                                                                                                                                                                                                                   |
|--------------------------|----|----------------------------------------------------------------------------------------------------------------------------------------------------------------------------|-----------------------|-----------------------------------------------------------------------------------------------------------------------------------------------------------------------------------------------------------------------------------|
| Other analyses           | 17 | Report other analyses done—eg analyses of subgroups and interactions, and sensitivity analyses                                                                             | 8                     | Sensitivity analyses summarised                                                                                                                                                                                                   |
| <b>Discussion</b>        |    |                                                                                                                                                                            |                       |                                                                                                                                                                                                                                   |
| Key results              | 18 | Summarise key results with reference to study objectives                                                                                                                   | 9                     | Key finding summarised at opening of Discussion: ‘This study has demonstrated that higher capitation funding is associated with significantly higher overall practice quality ratings and ratings across all individual domains.’ |
| Limitations              | 19 | Discuss limitations of the study, taking into account sources of potential bias or imprecision. Discuss both direction and magnitude of any potential bias                 | 10                    | Discussed under heading, ‘Strengths and Weaknesses of the study’                                                                                                                                                                  |
| Interpretation           | 20 | Give a cautious overall interpretation of results considering objectives, limitations, multiplicity of analyses, results from similar studies, and other relevant evidence | 10/11                 | Cautious interpretation summarised with reference to the literature                                                                                                                                                               |
| Generalisability         | 21 | Discuss the generalisability (external validity) of the study results                                                                                                      | 11                    | Summarised under, ‘Implications for policy and practice’                                                                                                                                                                          |
| <b>Other information</b> |    |                                                                                                                                                                            |                       |                                                                                                                                                                                                                                   |
| Funding                  | 22 | Give the source of funding and the role of the funders for the present study and, if applicable, for the original study on which the present article is based              | In submission details | First author is funded as Doctoral Research Fellow (DRF) by NIHR                                                                                                                                                                  |

\*Give information separately for cases and controls in case-control studies and, if applicable, for exposed and unexposed groups in cohort and cross-sectional studies.

**Note:** An Explanation and Elaboration article discusses each checklist item and gives methodological background and published examples of transparent reporting. The STROBE checklist is best used in conjunction with this article (freely available on the Web sites of PLoS Medicine at <http://www.plosmedicine.org/>, Annals of Internal Medicine at <http://www.annals.org/>, and Epidemiology at <http://www.epidem.com/>). Information on the STROBE Initiative is available at [www.strobe-statement.org](http://www.strobe-statement.org).

# BMJ Open

## The relationship between general practice capitation funding and the quality of primary care in England: a cross-sectional, three-year study

|                                 |                                                                                                                                                                                                                                                                                                                                                                                                                                                        |
|---------------------------------|--------------------------------------------------------------------------------------------------------------------------------------------------------------------------------------------------------------------------------------------------------------------------------------------------------------------------------------------------------------------------------------------------------------------------------------------------------|
| Journal:                        | <i>BMJ Open</i>                                                                                                                                                                                                                                                                                                                                                                                                                                        |
| Manuscript ID                   | bmjopen-2019-030624.R1                                                                                                                                                                                                                                                                                                                                                                                                                                 |
| Article Type:                   | Original research                                                                                                                                                                                                                                                                                                                                                                                                                                      |
| Date Submitted by the Author:   | 13-Aug-2019                                                                                                                                                                                                                                                                                                                                                                                                                                            |
| Complete List of Authors:       | L'Esperance, Veline; King's College London, UK, School of Population Health and Environmental Sciences<br>Gravelle, Hugh; University of York, Centre for Health Economics<br>Schofield, Peter; King's College London, UK, School of Population Health and Environmental Sciences<br>Santos, Rita; University of York, Centre for Health Economics<br>Ashworth, Mark; King's College London, UK, School of Population Health and Environmental Sciences |
| <b>Primary Subject Heading</b>: | General practice / Family practice                                                                                                                                                                                                                                                                                                                                                                                                                     |
| Secondary Subject Heading:      | Health economics, Health policy, Health services research                                                                                                                                                                                                                                                                                                                                                                                              |
| Keywords:                       | PRIMARY CARE, Quality in health care < HEALTH SERVICES ADMINISTRATION & MANAGEMENT, HEALTH ECONOMICS, Health inequalities, primary care funding, general practice                                                                                                                                                                                                                                                                                      |
|                                 |                                                                                                                                                                                                                                                                                                                                                                                                                                                        |

SCHOLARONE™  
Manuscripts



**Title:**

**The relationship between general practice capitation funding and the quality of primary care in England: a cross-sectional, three-year study**

**Authors:**

Veline L'Esperance<sup>1</sup>, Hugh Gravelle<sup>2</sup>, Peter Schofield<sup>3</sup>, Rita Santos<sup>4</sup>, Mark Ashworth<sup>5</sup>

1. Doctoral Research Fellow, School of Population Health & Environmental Sciences, Kings College London, London, UK
  2. Professor of Economics, Centre for Health Economics, University of York, York, UK
  3. Wolfson Lecturer, School of Population Health & Environmental Sciences, Kings College London, London, UK
  4. Research Fellow, Centre for Health Economics, University of York, York, UK
  5. Reader in Primary Care, School of Population Health & Environmental Sciences, Kings College London, London, UK
- Corresponding author email: mark.ashworth@kcl.ac.uk

**Abstract:**

**Objective** To explore the relationship between general practice capitation funding and quality ratings based on general practice inspections.

**Design** Cross-sectional study pooling three years of primary care administrative data.

**Setting** UK primary care.

**Participants** 7310 practices (95% of all practices) in England which underwent Care Quality Commission (CQC) inspections between November 2014 and December 2017.

**Main outcome measures** CQC ratings. Ordered logistic regression methods were used to predict the relationship between practice capitation funding and CQC ratings in each of five domains of quality: caring, effective, responsive, safe and well-led, together with an overall practice rating.

**Results** Higher capitation funding per patient was significantly associated with higher CQC ratings across all five quality domains; caring (odds ratio [OR] 1.14, 95% confidence interval [CI]: 1.04 to 1.23); effective (OR 1.08, 95% CI: 1.00 to 1.16); responsive (OR 1.09, 95%CI:

1  
2  
3 1.02 to 1.17); safe (OR 1.11, 95% CI: 1.05 to 1.18); well-led (OR 1.13, 95% CI: 1.06 to 1.20);  
4  
5 and overall rating (OR 1.13, 95% CI: 1.06 to 1.19).  
6  
7

8 **Conclusion:** Higher capitation funding was consistently associated with higher ratings across  
9  
10 all CQC domains and in the overall practice rating. This study suggests that measured  
11  
12 dimensions of the quality of care are related to the underlying capitation funding allocated  
13  
14 to each general practice, implying that additional capitation funding may be associated with  
15  
16 higher levels of primary care quality.  
17  
18  
19  
20  
21  
22

### 23 **Strengths and limitations**

- 24
- 25 • A cross-sectional study covering three years of primary care data
- 26
- 27
- 28 • The definition of primary care quality used in this study was multidimensional,  
29  
30 based on inspection findings and covering patient safety, patient experience, clinical  
31  
32 effectiveness.  
33
- 34
- 35 • The association between the achievement of quality ratings and practice capitation  
36  
37 funding was explored, adjusted for known confounders  
38
- 39
- 40 • Although based on a near complete sample of general practices in England, bias may  
41  
42 have been introduced by data coding and recording errors  
43  
44
- 45 • Longer term and prospective studies are required to strengthen causal inferences  
46  
47  
48  
49  
50  
51  
52  
53  
54  
55  
56  
57  
58  
59  
60

## Introduction

Improving the quality of care is a major focus of UK government health policy(1). High quality health care has three main components: clinical achievement, patient experience and patient safety(2). There is wide variation between general practices in the achievement of clinical care quality indicators and patient reported satisfaction(3, 4).

It is important to understand whether variations in the quality of care provided across practices are related to variations in their funding. Healthcare quality regulation in England is currently undertaken by the Care Quality Commission, focuses on outcomes for patients and has a wide range of enforcement powers, including closure and deregistration of services, if essential standards are not met.(5)

Studies of the relationship between quality and funding in English general practices have largely focussed on the Quality and Outcomes Framework (QOF) which rewards practices for higher quality care, as defined by the achievement of clinical process and outcome targets. The QOF has had limited impact on reducing secondary care costs(6) or improving primary care performance(7, 8). In terms of financial incentivisation, the QOF accounted for approximately 7.8% of funding received by general practices in England in 2016(9). In contrast, capitation payments represent the largest proportion of funding to general practice (54% in 2016) and are related to the number of registered patients in each practice(9), adjusted for factors thought to increase the demand on primary care services(10). Other components of general practice funding include additional payments for postgraduate training, the provision of additional clinical services ('enhanced services') and various

1  
2  
3 reimbursements to cover the costs of premises, computers and for some practices, dispensing  
4  
5 medication(11).  
6  
7

8  
9 Greater capitation spending on general practices has been found to be associated with  
10  
11 reductions in secondary care usage and costs, and increased patient satisfaction(12). Studies  
12  
13 have also shown that leadership within the practice organisation plays a key role in the  
14  
15 delivery of high quality care(13). Until recently, nationally derived metrics of inspection-based  
16  
17 primary care quality were unavailable. Since October 2014 all general practices have been  
18  
19 subjected to inspections by the Care Quality Commission (CQC) (14), (5). The CQC reports on  
20  
21 the extent to which practices are caring, effective, responsive to the needs of patients, safe,  
22  
23 and well-led(5, 15) and also combines these five domains to produce an overall practice  
24  
25 rating. These five domains incorporate components of clinical achievement, patient  
26  
27 experience and patient safety(2). In this study, we assess the relationship of practice  
28  
29 capitation funding with overall CQC ratings and with the individual CQC domains. We aimed  
30  
31 to examine the relationship between practice funding and the quality of care as determined  
32  
33 by inspection-based quality assessment. Analysis of total practice funding would have  
34  
35 introduced confounding through inclusion of quality-related payments. We therefore used  
36  
37 capitation funding as our measure of practice funding since this financial indicator is  
38  
39 independent of financial rewards associated with quality achievement such as the QOF and  
40  
41 other national and local incentive schemes.  
42  
43  
44  
45  
46  
47  
48  
49  
50  
51

## 52 **Methods**

### 53 ***Data sources***

54  
55 We linked practice-level data on NHS payments to general practice identifiers(16), CQC  
56  
57 inspection ratings(15), NHS administrative datasets, General and Personal Medical Services  
58  
59  
60

1  
2  
3 Statistics (17), and small area Census and socio-economic data from Neighbourhood  
4  
5  
6 Statistics(18).

### 10 ***Care Quality Commission Ratings***

11  
12 CQC ratings are based on publicly available data (such as QOF and General Practice Patient  
13  
14 Survey(19)), practice inspections, interviews with patients and staff, complaints, clinical  
15  
16 record reviews, reviews of practice documents and policies(15). We used CQC ratings for  
17  
18 practices with completed CQC reports first inspected between November 2014 and December  
19  
20 2017 (n = 7310, 95% of all practices). Practice ratings were obtained from the CQC; these data  
21  
22 are publicly available on request. For practices which required reinspection only the first  
23  
24 inspection score was included in the analysis. The five domains of quality described by CQC  
25  
26 inspections are summarised in Table 1; each is rated on a 4-point scale.

### 33 ***Practice data***

34  
35  
36 Data for all general practices in England were obtained from the General and Personal  
37  
38 Medical Services database, for 2014/15, 2015/16 and 2016/17 financial years (17). These data  
39  
40 are publicly available from NHS Digital. Our use of practice based demographic data followed  
41  
42 a previously used methodology(20). Patient characteristics included the proportion of  
43  
44 patients aged 0 to 4 years, proportion of patients aged 75 years or older and proportion of  
45  
46 nursing home patients. Deprivation data for each general practice was attributed as the mean  
47  
48 of the Index of Multiple Deprivation (IMD) 2015(18) weighted by the proportion of practice  
49  
50 patients resident in each Lower Layer Super Output area (LLSOA). Neighbourhood ethnicity  
51  
52 (proportion Asian or black) derived from the 2011 national census, was attributed to practices  
53  
54 weighted by the proportion of the practice population in each LLSOA(21). The following  
55  
56  
57  
58  
59  
60

1  
2  
3 practice characteristics were included: region (North, Midlands, London and South), contract  
4 type (General Medical Services or Personal Medical Services), minimum distance from an  
5 acute hospital, dispensing status (whether the practice dispensed as well as prescribed  
6 medication), singlehanded practice status (singlehanded practices have  $\leq 1.0$  FTE GP; group  
7 practices have  $> 1.0$  FTE GPs) and training practice status. We did not include practice staffing  
8 (GPs, nurses, other staff) as explanatory variables in the model because staffing is likely to be  
9 directly affected by practice capitation funding and so inclusion of these variable may lead to  
10 an underestimate of the full effect of capitation funding. Moreover, a major change in the  
11 way in which staffing data was collected in 2015/16 would have resulted in a large reduction  
12 in observation number.

### ***Practice capitation***

31 Practice capitation funding depends on the total number of practice patients adjusted to  
32 reflect factors affecting GP workload (age, gender, patients in nursing and residential homes,  
33 small area measures of morbidity), rurality and an index of local staff costs which affect the  
34 cost of providing services(10). Data was available for the financial years 2014/15, 2015/16  
35 and 2016/7(22). We use the mean capitation payment per patient for the year prior to  
36 inspection and the year in which the practice was inspected.

### ***Sample***

50 We linked inspected practices (n=7310) with funding data for their year of inspection. We  
51 excluded atypical practices with  $\leq 750$  registered patients (n=10) or  $\leq 500$  patients per FTE GP  
52 (n= 8) following a previously used method(23). Practices with recorded negative (n= 2) or  
53 zero funding (n = 52) were excluded. The final analysis sample consisted of 7238 practices.

### **Data Analysis**

Analysis was conducted at GP practice level. Since the CQC rating outcomes are ordered categories we used ordered logistic regression to model the relationship between funding and the practice CQC ratings(24). Separate models were estimated for each domain.

The key explanatory variable was capitation funding per patient. Capitation funding per patient is reported in standard deviation units. In addition to patient and practice characteristic covariates, the regression models included year effects to allow for inspection year and annual general practice funding uplifts. We accounted for local area effects by adjusting for clustering at Clinical Commissioning Group (CCG) level. Multicollinearity was tested for by calculating the Variance Inflation Factor (VIF) and variables with a value for VIF>5 were excluded. The proportional odds assumption of the ordered logit model was also tested(25). We report the odds ratio from the estimated models.

We calculated the average marginal effects of funding on the predicted probabilities of achieving overall ratings of “outstanding” and “inadequate” for all practices. We also compared the predicted probabilities of an “outstanding” overall rating at different practice capitation funding levels for training versus non-training practices, single-handed versus multi-handed practices, and rural versus urban practices. STATA 14 (StataCorp, College Station, TX) was used for all statistical analyses.

### **Patient involvement**

1  
2  
3 Funding for this study included funding of a dedicated patient involvement group. Patients  
4  
5 were involved in developing plans for the study design, approving the outcome measures and  
6  
7 commenting on the potential impact of outcomes. A lay summary was also provided.  
8  
9

## 10 11 12 **Results**

13  
14 Summary statistics for the main characteristics of the general practices are provided in Table

15  
16  
17 2. Mean practice capitation funding per registered patient increased from £77.49 in 2014/5  
18  
19 to £83.17 in 2016/7 (Table 3). The mean capitation funding per patient across the CQC  
20  
21 inspection period was £79.48. The standard deviation of the mean capitation funding per  
22  
23 patient was £22.00.  
24  
25

26  
27  
28 The distribution of practice ratings across each quality domain is shown in Figure 1. A total of  
29  
30 79% (n = 5774) of practices achieved an overall rating of 'Good', while only 4% (294) achieved  
31  
32 an overall rating of 'Outstanding'. 'Inadequate' ratings varied across the domains, from 1%  
33  
34 (caring domain) to 6% (safety domain) and 4% (overall).  
35  
36

37  
38  
39 Figure 2 shows the difference in capitation funding for practices with the lowest quality rating  
40  
41 compared to those with the highest quality rating. In each domain, 'Inadequate' practices  
42  
43 received less capitation funding. Using an independent group t-test this difference was found  
44  
45 to be significant for three domains (caring, safe, well-led) and for the overall practice rating.  
46  
47  
48

49  
50  
51 Table 4 reports the odds ratios on capitation funding per patient estimated from four  
52  
53 regression models of overall practice CQC rating. The odds ratio on capitation funding per  
54  
55 patient is reported in standard deviation (SD units). In the first model capitation funding is  
56  
57 the only explanatory variable (unadjusted model); remaining models are adjusted for  
58  
59  
60



1  
2  
3 inclusion of successive additional explanatory variables: year effects, patient characteristics,  
4 and practice characteristics. The unadjusted model shows an association between higher  
5 capitation funding and higher overall CQC ratings with an odds ratio (OR) of 1.09 (95%  
6 confidence interval (CI): 1.03 to 1.15). Allowing for the year of inspection increased the OR  
7 slightly to 1.10 (95%CI: 1.04 to 1.16). Additional allowance for patient characteristics (OR 1.13;  
8 95%CI: 1.06 to 1.19) and practice characteristics (OR 1.13; 95%CI: 1.06 to 1.19) further  
9 increased the odds ratio. The number of observations in Table 4 fell from 7,168 to 7,045  
10 because of missing data. Very similar changes in odds ratios across the models were observed  
11 when all models were restricted to equal sample sizes. A likelihood ratio test demonstrated  
12 that the addition of patient and practice variables create a statistically significant  
13 improvement in model fit, confirming that higher odds ratios were associated with the  
14 addition of model variables, rather than to a change in sample size.  
15  
16  
17  
18  
19  
20  
21  
22  
23  
24  
25  
26  
27  
28  
29  
30  
31  
32  
33

34 The final adjusted model indicates that for a one standard deviation increase in capitation  
35 funding, the odds of achieving an outstanding CQC rating are 1.13 times greater, given that  
36 other variables are held constant. We have also shown the estimated changes in the  
37 probabilities of achieving 'inadequate' and 'outstanding' CQC ratings implied by this model in  
38 Figures 3 to 7.  
39  
40  
41  
42  
43  
44  
45  
46  
47

48 Table 5 reports odds ratios for all the explanatory variables in the overall practice quality  
49 rating model (Model 4, Table 4). In addition to higher practice capitation funding, rural  
50 practice and training practice status were significantly associated with higher overall practice  
51 ratings. For example, the adjusted odds ratio of a training practice achieving an 'outstanding'  
52  
53  
54  
55  
56  
57  
58  
59  
60

1  
2  
3 CQC rating is 2.30 times greater than for a non-training practice. Conversely, for singlehanded  
4  
5 practices the odds of achieving an 'outstanding' rating is 0.53 times that for group practices.  
6  
7

8  
9  
10 The odds ratios for capitation funding per patient from the full models for each CQC domain  
11  
12 are shown in Table 6. Higher capitation funding was significantly associated with higher CQC  
13  
14 ratings across all five quality domains.  
15  
16

17  
18  
19 We used the results from the ordered logistic regression models with the full set of  
20  
21 explanatory variables to calculate the probability of achieving an overall practice rating of  
22  
23 'Outstanding' or 'Inadequate' at different levels of capitation funding. Figure 3 shows the  
24  
25 average predicted probability of achieving an 'Outstanding' rating for a range of per capita  
26  
27 funding levels. The probabilities are the average of the estimated probabilities for each  
28  
29 practice calculated at each funding level using actual values of the practice non-funding  
30  
31 characteristics (year effects, patient characteristics and practice characteristics). Figure 4  
32  
33 shows the average predicted probability of achieving an 'Inadequate' practice rating. Higher  
34  
35 capitation funding was associated with reduced probability of achieving an 'Inadequate'  
36  
37 rating and increased probability of an 'Outstanding' quality rating. At capitation payments  
38  
39 above £100 per patient, practices have a greater probability of being rated as "Outstanding"  
40  
41 rather than "Inadequate".  
42  
43  
44  
45  
46  
47  
48  
49

50 We also compared the probability of achieving an 'Outstanding' rating at different levels of  
51  
52 practice capitation funding for training versus non-training practices (Figure 5), for single-  
53  
54 handed versus group practices (Figure 6), and for rural versus urban practices (Figure 7). At  
55  
56 all levels of funding, the probability of achieving an 'Outstanding' rating is higher for training  
57  
58 practices than non-training practices, for group practices than single handed practices, and  
59  
60

1  
2  
3 rural practices than urban practices. In all cases higher capitation funding is associated with  
4  
5 higher probabilities of an 'Outstanding' rating.  
6  
7  
8  
9

### 10 **Sensitivity Analyses**

11  
12 The Brant test(25) assesses the proportional odds assumption that the distance between each  
13  
14 category is equivalent. Four of the variables included in our model (region, proportion of  
15  
16 patients aged 0-4 years, contract type and single-hander status) did not meet the assumption  
17  
18 of proportionality of the odds ratios. However, our variable of interest, capitation funding per  
19  
20 patient, did not violate the proportional odds assumption. A partial proportional odds model  
21  
22 excluding these four variables, estimated by generalised ordered logistic regression, yielded  
23  
24 similar results to our main model: higher capitation funding was significantly associated with  
25  
26 increase probability of achieving an 'Outstanding' rating (OR 1.14, 95% CI: 1.04 to 1.25).  
27  
28  
29  
30  
31  
32  
33

### 34 **Discussion**

35  
36 This study has demonstrated that higher capitation funding is associated with significantly  
37  
38 higher overall practice quality ratings and ratings across all individual domains.  
39  
40  
41  
42

43 Practice characteristics such as post-graduate training practice and group practice status were  
44  
45 also associated with higher quality ratings, representing primary care structures which  
46  
47 support higher quality of care. However, some factors related to the registered practice  
48  
49 population, such as urban location, social deprivation and larger proportions of ethnic  
50  
51 minority patients were negatively associated with the practice quality of care rating. Many of  
52  
53 these factors are already known to be negatively associated with reported patient satisfaction  
54  
55 (26) and QOF achievement (27). Including them in the model led to a stronger association of  
56  
57 practice capitation funding with practice quality rating. The likely reason for this is that  
58  
59  
60

1  
2  
3 practice capitation funding is positively correlated with patient characteristics which have  
4  
5 negative effects on the quality rating. Thus, including these patient characteristics in the  
6  
7 model removes a source of bias from omitted variables which would otherwise tend to  
8  
9 underestimate the positive association of funding with the quality rating.  
10  
11  
12

### 13 14 15 **Strengths and weaknesses of the study**

16  
17 This is the first study to explore the relationship between practice-level capitation funding  
18  
19 and practice quality as measured by CQC ratings. The findings are based on a near complete  
20  
21 sample of general practices across England. Using data linkages from a wide range of sources,  
22  
23 and multilevel statistical models, this study has been able to demonstrate the independent  
24  
25 effects of practice funding and practice characteristics on quality ratings, which might  
26  
27 otherwise be confounded in single-level analyses. A variety of sensitivity analyses have  
28  
29 confirmed the robustness of the ordered logistic regression modelling.  
30  
31  
32  
33

34  
35 However, there are several limitations. Routinely collected data are subject to coding and  
36  
37 recording errors. As with all observational studies, significant associations, even if large, may  
38  
39 not be causal. Although a wide range of potential confounders were included in the models,  
40  
41 confounding by omitted variables cannot be excluded.  
42  
43  
44  
45

### 46 47 48 **Comparison with existing literature**

49  
50 These findings complement those of a previous study which found that increased general  
51  
52 practice capitation funding was associated with reduced emergency hospital admissions and  
53  
54 Accident and Emergency attendances(12).  
55  
56  
57  
58  
59  
60

1  
2  
3 In a country level European analysis it was found that systems relying on capitation funding  
4  
5 were more responsive than those based on fee for service or mixed payment(28). However,  
6  
7 analysis of Scottish general practices suggests that capitation funding may contribute to the  
8  
9 persistence of the inverse care law with deprived areas experiencing lower quality of care, as  
10  
11 defined by inspection ratings(29). Consistent with our study, others have found that GP  
12  
13 practice funding is negatively correlated with healthcare need predictors such as deprivation  
14  
15 and non-white ethnicity(30). Previous studies have also demonstrated that greater GP  
16  
17 workload may be associated with higher levels of social deprivation and with a higher  
18  
19 proportion of Asian patients(31). Similarly, practices with a greater proportion of ethnically  
20  
21 diverse patients reported worse patient experience(32). Our work is also consistent with a  
22  
23 recent study which demonstrated that GPs co-located with other GPs and professionals had  
24  
25 improved outcomes compared with single-handed GP practices such as broader provision of  
26  
27 technical procedures, wider coordination with secondary care and increased collaboration  
28  
29 among different providers (33).  
30  
31  
32  
33  
34  
35  
36  
37  
38

39 Our study was based on funding data for general practices but was unable to study the  
40  
41 relationship between quality ratings and individual GP income. However, values for overall  
42  
43 'profit' per practice are expected to become available in due course. Other studies have  
44  
45 confirmed that incentives based on personal income may influence both quality achievement  
46  
47 and productivity(34).  
48  
49  
50  
51  
52

### 53 **Implications for policy and practice**

54 This work provides further evidence of the association between general practice capitation  
55  
56 funding and the quality of primary care. A causal association is plausible and supports the  
57  
58  
59  
60

1  
2  
3 argument that increased quality and safety of patient care may be achieved through  
4  
5 additional investment. The recently published NHS Long Term Plan(35) outlines proposals to  
6  
7 offer increases in capitation payment together with an emphasis on inter-practice  
8  
9 cooperation through the formation of primary care networks. Both factors are likely to  
10  
11 influence the relationship between funding and the quality of primary care and will require  
12  
13 further study. Our findings suggest that revisions to the primary care capitation formula are  
14  
15 necessary to ensure that additional funding is provided in urban areas of high deprivation and  
16  
17 ethnic minority populations in order to address quality of care inequalities.  
18  
19  
20  
21  
22  
23

### 24 **Unanswered questions and future research**

25  
26  
27 Future research could extend similar analyses to subsequent 3-year cycles of quality  
28  
29 inspection. A longitudinal approach, relating changes in funding to changes in outcomes, is  
30  
31 likely to provide more accurate estimates of the effect of funding. Complementary qualitative  
32  
33 analysis is likely to provide insight into mechanisms underlying the link between better  
34  
35 funded practices and higher quality rating achievement.  
36  
37  
38  
39  
40

### 41 **Conclusion**

42  
43 Higher capitation funding was consistently associated with higher overall and domain quality  
44  
45 ratings yielded by CQC inspections. This study suggests that measured and inspected  
46  
47 dimensions of the quality of care are related to the underlying funding allocated to each  
48  
49 general practice, implying that additional funding may be associated with higher levels of  
50  
51 primary care quality.  
52  
53  
54

### 55 **What is already known on this topic**

- 56  
57  
58  
59 • Few studies on the relationship between capitation funding and quality  
60

- 1  
2  
3 • In England, the QOF has had limited impact on reducing healthcare costs and  
4  
5 improving primary care performance  
6  
7

8 **What this study adds**  
9

- 10 • Higher capitation funding is associated with increased quality ratings across all  
11 domains  
12  
13 • Since the NHS Long Term Plan calls for increased funding to primary care it is  
14 important to understand how and where this funding should be directed  
15  
16 • Our findings imply that further primary care funding is particularly needed in areas of  
17 high deprivation and ethnic minority populations where funding may be insufficient  
18 to support high quality of care.  
19  
20  
21  
22  
23  
24  
25  
26  
27  
28  
29  
30  
31  
32  
33  
34  
35  
36  
37  
38  
39  
40  
41  
42  
43  
44  
45  
46  
47  
48  
49  
50  
51  
52  
53  
54  
55  
56  
57  
58  
59  
60

1  
2  
3 **Contributors:** VL, HG, PS, RS and MA contributed to the idea and design of the study. VL and PS led  
4 on data analysis with statistical advice from HG, RS and MA. VL produced the first draft of the paper;  
5  
6 all co-authors contributed and approved the final draft. VL is the guarantor. The corresponding  
7  
8 author attests that all listed authors meet authorship criteria and that no others meeting the criteria  
9  
10 have been omitted.  
11  
12  
13  
14

15 **Funding:** This work was supported by the National Institute for Health Research (NIHR) who  
16 funded a Doctoral Research Fellowship for VL (reference, DRF-2017-10-132) and for RS  
17 (reference, DRF-2014-07-055). HG and RS were funded by the UK NIHR Policy Research  
18 Programme (Policy Research Unit in the Economics of Health and Social Care Systems: Ref  
19 103/0001). The views expressed are those of the authors and not necessarily those of the  
20 NHS, the National Institute for Health Research, the Department of Health and Social Care or  
21 its arm's length bodies or other UK government departments. The findings presented are  
22 independent from the funders who have had no role in study design, data collection, data  
23 analysis, data interpretation, or writing of the report.  
24  
25  
26  
27  
28  
29  
30  
31  
32  
33  
34  
35

36 **Competing interests:** All authors have completed the ICMJE uniform disclosure form at  
37 [www.icmje.org/coi\\_disclosure.pdf](http://www.icmje.org/coi_disclosure.pdf) and declare: no support from any organisation for the  
38 submitted work; no financial relationships with any organisations that might have an interest  
39 in the submitted work in the previous three years; no other relationships or activities that  
40 could appear to have influenced the submitted work.  
41  
42  
43  
44  
45  
46  
47  
48

49 **Ethical approval:** Ethical approval not required for the use of aggregate practice level data as  
50 included in this study.  
51  
52  
53

54 **Dissemination declaration:** the results have been disseminated to the patient involvement  
55 group involved in study design and commenting on potential impact of outcomes.  
56  
57  
58

59 **Data sharing:** No additional data available.  
60



## Figures and Tables

**Table 1: The five key domains for CQC Inspections**

| Domain            | Description                                                                                                                                                                                                                                  |
|-------------------|----------------------------------------------------------------------------------------------------------------------------------------------------------------------------------------------------------------------------------------------|
| <b>Safe</b>       | Patients are protected from abuse and avoidable harm                                                                                                                                                                                         |
| <b>Effective</b>  | Care, treatment and support achieves good outcomes, helps patients to maintain quality of life and is based on the best available evidence                                                                                                   |
| <b>Caring</b>     | Staff involve and treat patients with compassion, kindness, dignity and respect                                                                                                                                                              |
| <b>Responsive</b> | Services are organised so that they meet patients' needs                                                                                                                                                                                     |
| <b>Well-led</b>   | The leadership, management and governance of the organisation make sure it's providing high-quality care that's based around the individual needs, that it encourages learning and innovation, and that it promotes an open and fair culture |

*Adapted from: CQC. The five key questions we ask(36)*

**Table 2. Characteristics of general practices and their populations in England**

| Variable                                              | Mean | (5th, 95th centiles) |
|-------------------------------------------------------|------|----------------------|
| Patient adjusted Index of Multiple Deprivation, 2015  | 24.5 | 8.2, 46.1            |
| Proportion of patients aged 0 to 4 years (%)          | 5.9  | 3.7, 8.8             |
| Proportion of patients aged 75 years or older (%)     | 7.7  | 2.6, 12.9            |
| Proportion of patients: nursing home residents (%)    | 0.5  | 0, 1.4               |
| Proportion of patients: Asian or black ethnicity (%)  | 13.1 | 0.1, 53.1            |
| List size per full-time equivalent (FTE) GP           | 1950 | 1066, 3315           |
| List size per FTE non-clinical employed staff         | 703  | 392, 1103            |
| List size per FTE nurse                               | 7166 | 2810, 15507          |
| Minimum distance of practice from acute hospital (km) | 3.8  | 0.4, 11.8            |
| Proportion of practices by rurality (%)               |      |                      |
| Urban                                                 | 85.5 |                      |
| Rural: hamlet, village, town & fringe                 | 14.5 |                      |
| Proportion of practices by region (%)                 |      |                      |
| North                                                 | 30.3 |                      |
| Midlands                                              | 29.4 |                      |
| London                                                | 18.0 |                      |
| South                                                 | 22.3 |                      |
| Proportion of practices by contract type (%)          |      |                      |
| General Medical Services                              | 59.4 |                      |
| Personal Medical Services                             | 40.6 |                      |
| Proportion of dispensing practices (%)                | 14.6 |                      |
| Proportion of singlehanded practices (%)              | 13.1 |                      |
| Proportion of training practices (%)                  | 30.4 |                      |

**Table 3: Capitation funding per registered patient for inspected practices**

| Inspection year | N    | Mean capitation funding | (5th, 95th centiles) |
|-----------------|------|-------------------------|----------------------|
| 2014/15         | 2232 | £77.49                  | £59.54, £99.99       |
| 2015/16         | 3790 | £80.86                  | £66.57, £101.66      |
| 2016/17         | 1148 | £83.71                  | £67.74, £106.76      |

**Table 4: Association of capitation funding per patient with overall practice CQC rating: unadjusted and adjusted regression models**

|                                                                                                                                                                                                                                                                                                                                                                                                                     | Model 1    | Model 2    | Model 3    | Model 4    |
|---------------------------------------------------------------------------------------------------------------------------------------------------------------------------------------------------------------------------------------------------------------------------------------------------------------------------------------------------------------------------------------------------------------------|------------|------------|------------|------------|
| Capitation funding odds ratio <sup>1</sup>                                                                                                                                                                                                                                                                                                                                                                          | 1.09**     | 1.10**     | 1.13***    | 1.13***    |
| 95% CI of odds ratio                                                                                                                                                                                                                                                                                                                                                                                                | 1.03, 1.15 | 1.04, 1.16 | 1.06, 1.19 | 1.06, 1.19 |
| Observations                                                                                                                                                                                                                                                                                                                                                                                                        | 7,168      | 7,168      | 7,144      | 7,045      |
| Models contain                                                                                                                                                                                                                                                                                                                                                                                                      |            |            |            |            |
| Year effects                                                                                                                                                                                                                                                                                                                                                                                                        | N          | Y          | Y          | Y          |
| Patient characteristics <sup>2</sup>                                                                                                                                                                                                                                                                                                                                                                                | N          | N          | Y          | Y          |
| Practice characteristics <sup>3</sup>                                                                                                                                                                                                                                                                                                                                                                               | N          | N          | N          | Y          |
| 1. Odds ratios based on Standard Deviation units.<br>2. Patient adjusted deprivation, proportion of patients aged 0 to 4 years, proportion of patients aged ≥75 years, proportion patients black or Asian ethnicity, proportion of nursing home residents.<br>3. Region, minimum distance to hospital, contract type, dispensing status, training practice status, singlehanded<br>*p< 0.05; **p< 0.01; ***p< 0.001 |            |            |            |            |

**Table 5: Association of capitation funding with overall practice CQC rating: predictor variable in fully adjusted model.**

| Characteristics                                        | Odds Ratio | 95% CI     |
|--------------------------------------------------------|------------|------------|
| Capitation funding per patient (SD units) <sup>1</sup> | 1.13***    | 1.06, 1.19 |
| Year 2                                                 | 0.92       | 0.80, 1.05 |
| Year 3                                                 | 0.76**     | 0.64, 0.91 |
| Deprivation                                            | 0.99**     | 0.98, 0.99 |
| Patients aged 0 to 4 years (proportion)                | 1.00       | 0.95, 1.05 |
| Patients aged 75 years or old (proportion)             | 0.99       | 0.96, 1.17 |
| Patients in nursing home (proportion)                  | 1.13*      | 1.02, 1.26 |
| Patients Asian or black ethnicity (proportion)         | 0.99*      | 0.99, 1.00 |
| Region: Midlands <sup>§</sup>                          | 0.64***    | 0.55, 0.76 |
| Region: London <sup>§</sup>                            | 0.56***    | 0.93, 0.98 |
| Region: South <sup>§</sup>                             | 0.48**     | 0.40, 0.58 |
| Minimum distance to hospital                           | 1.00       | 1.00, 1.00 |
| Rurality (Yes/No)                                      | 1.50**     | 1.18, 1.92 |
| Contract type (GMS/PMS)                                | 1.08       | 0.96, 1.23 |
| Dispensing Practice status (yes/no)                    | 1.10       | 0.88, 1.38 |
| Singlehanded practice (yes/no)                         | 0.53***    | 0.44, 0.63 |
| Training Practice status (yes/no)                      | 2.30***    | 1.99, 2.65 |
| *p< 0.05; **p< 0.01; ***p< 0.001                       |            |            |

<sup>1</sup> Odds ratios based on Standard Deviation units.

<sup>§</sup> Comparator Region: North

**Table 6: Ordered logistic models: effect of capitation funding on each CQC domain rating**

| Domains    | Odds Ratio <sup>1</sup> | 95% CI     |
|------------|-------------------------|------------|
| Caring     | 1.14**                  | 1.04, 1.23 |
| Effective  | 1.08*                   | 1.00, 1.16 |
| Responsive | 1.09*                   | 1.02, 1.17 |
| Safe       | 1.11*                   | 1.05, 1.18 |
| Well-led   | 1.13***                 | 1.06, 1.20 |
| Overall    | 1.13***                 | 1.06, 1.19 |

Adjusted for year effects, patient characteristics & practice characteristics &  
<sup>1</sup> Odds ratios based on Standard Deviation units.  
 \*p< 0.05; \*\*p< 0.01; \*\*\*p< 0.001

**Figure 1: Distribution of CQC ratings by each domain**

**Figure 2: Practice capitation funding by overall practice rating: 'Inadequate' versus 'Outstanding'**

**Figure 3: Estimated probability of overall practice rating of 'Outstanding' at various levels of capitation funding per registered patient**

**Figure 4: Estimated probability of overall practice rating of 'Inadequate' at various levels of capitation funding per registered patient**

**Figure 5: Estimated probability of 'Outstanding' overall practice CQC rating: training versus non-training practices**

**Figure 6: Estimated probability of 'Outstanding' overall practice CQC rating: single-handed versus group practices**

**Figure 7: Estimated probability of 'Outstanding' overall practice CQC rating: rural and urban practices**

## References:

1. Ham C, Berwick D, Dixon J. Improving quality in the English NHS: A strategy for action. London: The Kings Fund, 2016.
2. Department of Health. High Quality Care for All – NHS Next Stage Review Final Report. London: Department of Health, 2008.
3. Campbell S, Steiner A, Robison J, Weber D, Raven A, Roland M. Is the quality of care in general medical practice improving? Results of a longitudinal observational study. *Br J Gen Pract* 2003;53:298-304.
4. Llanwarne NR, Abel GA, Elliott MN, Paddison CAM, Lyratzopoulos G, Campbell JL, et al. Relationship Between Clinical Quality and Patient Experience: Analysis of Data From the English Quality and Outcomes Framework and the National GP Patient Survey. *Annals of Family Medicine*. 2013;11(5):467-72.
5. Gillam S, Siriwardena A. Regulation in primary care. *Quality in Primary Care* 2014;22:57–61.
6. Emmert M, Eijkenaar F, Kemter H, Esslinger AS, Schoffski O. Economic evaluation of pay-for-performance in health care: a systematic review. *Eur J Health Econ*. 2012;13:755-67.
7. Kontopantelis E., Springate D. A., Ashworth M., Webb R. T., Buchan I. E., Doran T. Investigating the relationship between quality of primary care and premature mortality in England: a spatial whole-population study. *BMJ*. 2015;350:h904.
8. Campbell SM, Reeves D, Kontopantelis E, Sibbald B, Roland M. Effects of pay for performance on the quality of primary care in England. *NEJM*. 2009;361:368-78.
9. NHS Digital. NHS Payments to General Practice, England, 2016/17. 2017.
10. British Medical Association. Focus on the global sum allocation formula (Carr-Hill Formula): British Medical Association; 2015 [12th April 2016]. Available from: [https://www.google.co.uk/url?sa=t&rct=j&q=&esrc=s&source=web&cd=1&cad=rja&uact=8&ved=0ahUKewi\\_sLK47f\\_OAhWLAMAKHZ2bC8oQFggcMAA&url=https%3A%2F%2Fwww.bma.org.uk%2F%2Fmedia%2Ffiles%2Fpdfs%2Fpractical%2520advice%2520at%2520work%2Fcontracts%2Fgps%2Ffocus%2520on%2520global%2520sum%2520allocation%2520formula.pdf%3Fla%3Den&usg=AFQjCNEfYEp15cpvpLtT77blobeHfSmGMQ&sig2=ojUD-oKqav9bcLejniNdtw&bvm=bv.131783435,d.d2s](https://www.google.co.uk/url?sa=t&rct=j&q=&esrc=s&source=web&cd=1&cad=rja&uact=8&ved=0ahUKewi_sLK47f_OAhWLAMAKHZ2bC8oQFggcMAA&url=https%3A%2F%2Fwww.bma.org.uk%2F%2Fmedia%2Ffiles%2Fpdfs%2Fpractical%2520advice%2520at%2520work%2Fcontracts%2Fgps%2Ffocus%2520on%2520global%2520sum%2520allocation%2520formula.pdf%3Fla%3Den&usg=AFQjCNEfYEp15cpvpLtT77blobeHfSmGMQ&sig2=ojUD-oKqav9bcLejniNdtw&bvm=bv.131783435,d.d2s).
11. NHS Digital. General and Personal Medical Services, England: 2005-2015, as at 30 September, Provisional Experimental statistics. NHS Digital, 2016.
12. L'Esperance V, Sutton M, Schofield P, Round T, Malik U, White P, et al. Impact of primary care funding on secondary care utilisation and patient outcomes: a retrospective cross-sectional study of English general practice. *Br J Gen Pract*. 2017(DOI: <https://doi.org/10.3399/bjgp17X693101>).
13. Dunham AH, Dunbar JA, Johnson JK, Fuller J, Morgan M, Ford D. What attributions do Australian high-performing general practices make for their success? Applying the clinical microsystems framework: a qualitative study. *BMJ Open*. 2018;8(4):e020552.
14. Care Quality Commission. The state of care in general practice 2014 to 2017. London: Care Quality Commission, 2017.
15. Care Quality Commission. How CQC monitors, inspects and regulates NHS GP practices. London: Care Quality Commission, 2018.
16. NHS Digital. NHS Payments to General Practice, England: NHS Digital; 2015. Available from: <http://digital.nhs.uk/catalogue/PUB18468/nhspaymentsgp-14-15-ann1.xlsx>.
17. NHS Digital. General and Personal Medical Services: NHS Digital; 2016. Available from: <http://digital.nhs.uk/catalogue/PUB20503>.
18. Department for Communities and Local Government. English indices of deprivation 2015. Department for Communities and Local Government 2015.
19. NHS England. The GP Patient Survey. NHS England, 2015 July 2014 Report No.
20. Ashworth M, White P, Jongsma H, Schofield P, Armstrong D. Antibiotic prescribing and patient satisfaction in primary care in England: cross-sectional analysis of national patient survey data and prescribing data. *Br J Gen Pract*. 2016;66(42).

21. Office for National Statistics. 2011 Census: Office for National Statistics; 2011 [21st January 2016]. Available from: <https://www.ons.gov.uk/census/2011census>.
22. NHS Digital. NHS Payments to General Practice, England, 2013-14: Experimental Statistics – Report. Available from: 2015 [5th Sept 2015]. Available from: <http://www.hscic.gov.uk/catalogue/PUB16847/nhspaymentsgp-13-14-rep.docx>.
23. Ashworth M, Schofield P, Durbaba S, Ahluwalia S. Patient experience and the role of postgraduate GP training: a cross-sectional analysis of national Patient Survey data in England. *Br J Gen Pract*. 2014;64(620):168-77.
24. Lall R, Campbell MJ, Walters SJ, Morgan K. A review of ordinal regression models applied on health-related quality of life assessments. *Stat Methods Med Res*. 2002;11(I):49-67.
25. Brant R. Assessing proportionality in the proportional odds model for ordered logistic regression. *Biometrics*. 1990;46: 1171-8.
26. Roberts MJ, Campbell JL, Abel GA, al et. Understanding high and low patient experience scores in primary care: analysis of patients' survey data for general practices and individual doctors. *BMJ*. 2014;349:g6034.
27. Ashworth M, Armstrong D. The relationship between general practice characteristics and quality of care: a national survey of quality indicators used in the UK Quality and Outcomes Framework, 2004–5. *BMC Fam Pract*. 2006;7:68.
28. Murante AM, Seghieri C, Vainieri M, Schäfer WLA. Patient-perceived responsiveness of primary care systems across Europe and the relationship with the health expenditure and remuneration systems of primary care doctors. *Soc Sci Med*. 2017;185:139-47.
29. McLean G, Guthrie B, Mercer SW, Watt GC. General practice funding underpins the persistence of the inverse care law: cross-sectional study in Scotland. *Br J Gen Pract*. 2015; 65(641):799-805.
30. Levene L, Baker R, Wilson A, Walker N, Boomla K, Bankart M. Population health needs as predictors of variations in NHS practice payments: a cross-sectional study of English general practices in 2013–2014 and 2014–2015. *Br J Gen Pract*. 2016;67(654):e10-e9.
31. Mukhtar TK, Bankhead C, Stevens S, Perera R, Holt TA, Salisbury C, et al. Factors associated with consultation rates in general practice in England, 2013–2014: a cross-sectional study. *Br J Gen Pract* 2018;68(670):e370-e7.
32. Lyratzopoulos G, Elliott M, Barbieri JM, al et. Understanding ethnic and other socio-demographic differences in patient experience of primary care: evidence from the English General Practice Patient Survey. *BMJ Qual Saf*. 2012;21(1):21-9.
33. Bonciani M, Schäfer W, Barsanti S, Heinemann S, Groenewegen PP. The benefits of co-location in primary care practices: the perspectives of general practitioners and patients in 34 countries. *BMC Health Serv Res*. 2018 18(1):132.
34. Gosden T, Forland F, Kristiansen IS, Sutton M, Leese B, Giuffrida A, et al. Impact of payment method on behaviour of primary care physicians: a systematic review. *J Health Serv Res Policy*. 2001;6(1):44-55.
35. NHS England. The NHS Long Term Plan. NHS England, 2019.
36. Care Quality Commission. The five key questions we ask: Care Quality Commission; 2016 [12th April 2017]. Available from: <http://www.cqc.org.uk/content/five-key-questions-we-ask>.

1  
2  
3  
4  
5  
6  
7  
8  
9  
10  
11  
12  
13  
14  
15  
16  
17  
18  
19  
20  
21  
22  
23  
24  
25  
26  
27  
28  
29  
30  
31  
32  
33  
34  
35  
36  
37  
38  
39  
40  
41  
42  
43  
44  
45  
46  
47  
48  
49  
50  
51  
52  
53  
54  
55  
56  
57  
58  
59  
60

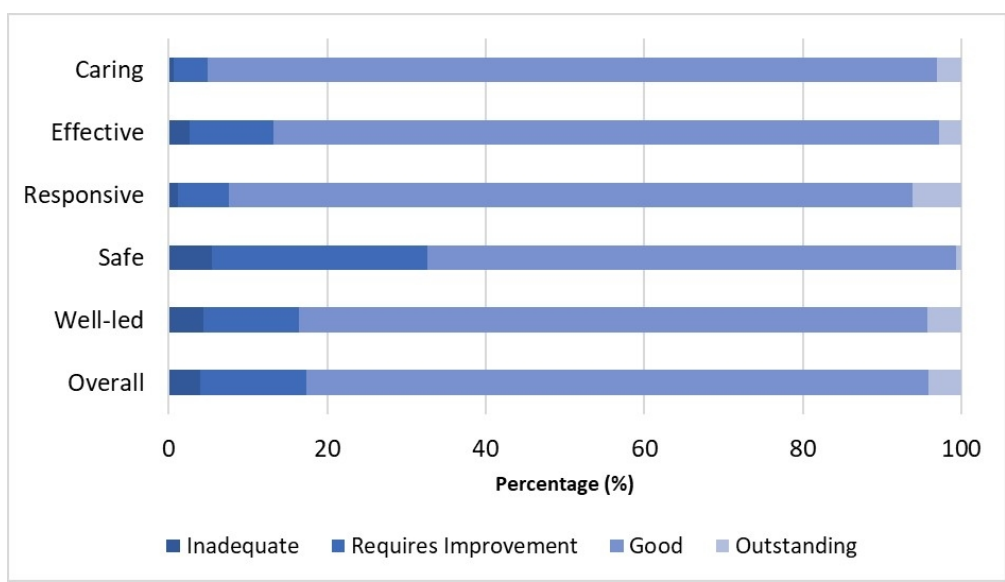

Figure 1: Distribution of CQC ratings by each domain: Distribution of CQC ratings by each domain  
159x90mm (150 x 150 DPI)

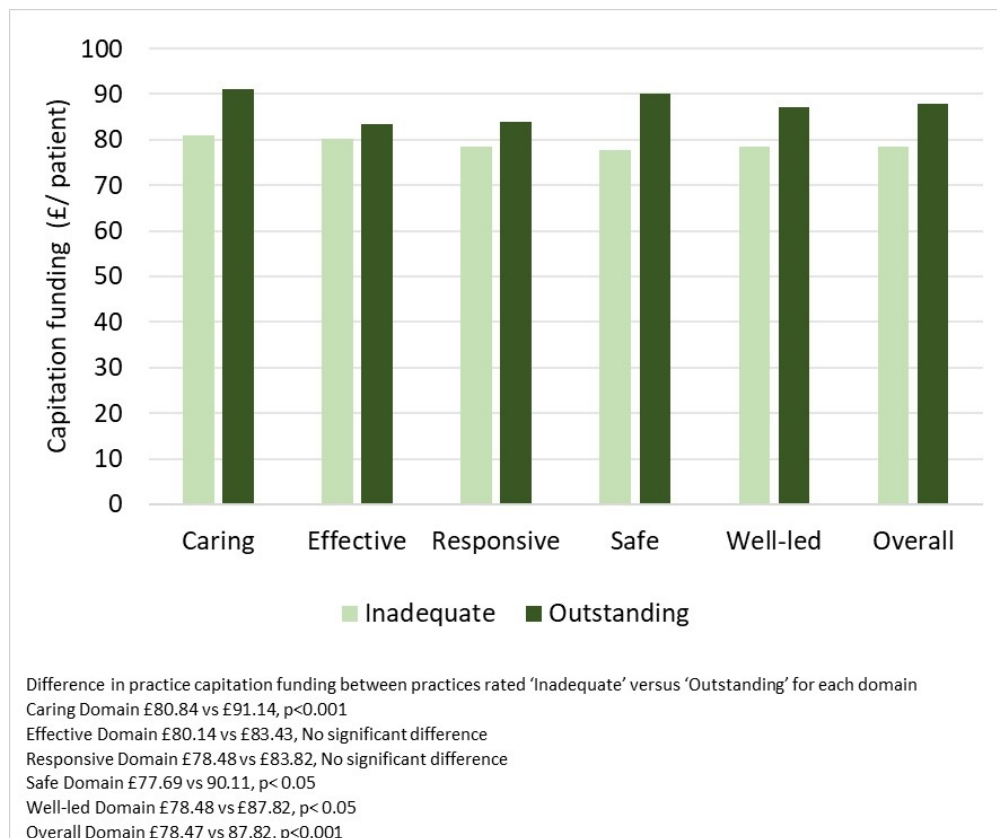

Figure 2: Practice capitation funding by overall practice rating: 'Inadequate' versus 'Outstanding'

150x125mm (150 x 150 DPI)



1  
2  
3  
4  
5  
6  
7  
8  
9  
10  
11  
12  
13  
14  
15  
16  
17  
18  
19  
20  
21  
22  
23  
24  
25  
26  
27  
28  
29  
30  
31  
32  
33  
34  
35  
36  
37  
38  
39  
40  
41  
42  
43  
44  
45  
46  
47  
48  
49  
50  
51  
52  
53  
54  
55  
56  
57  
58  
59  
60

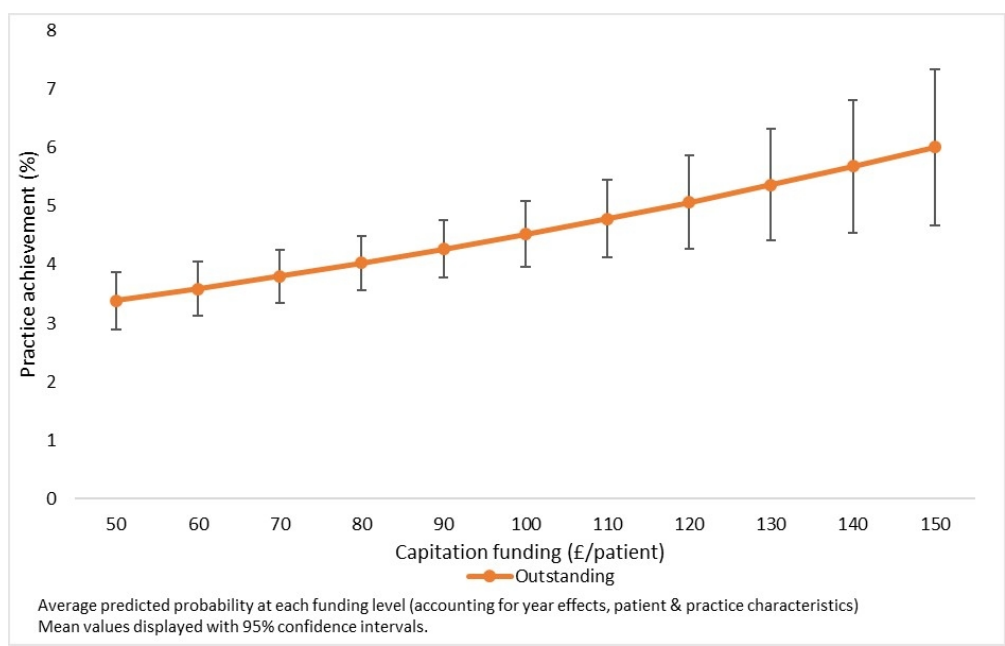

Figure 3: Estimated probability of overall practice rating of 'Outstanding' at various levels of capitation funding per registered patient

159x100mm (150 x 150 DPI)

1  
2  
3  
4  
5  
6  
7  
8  
9  
10  
11  
12  
13  
14  
15  
16  
17  
18  
19  
20  
21  
22  
23  
24  
25  
26  
27  
28  
29  
30  
31  
32  
33  
34  
35  
36  
37  
38  
39  
40  
41  
42  
43  
44  
45  
46  
47  
48  
49  
50  
51  
52  
53  
54  
55  
56  
57  
58  
59  
60

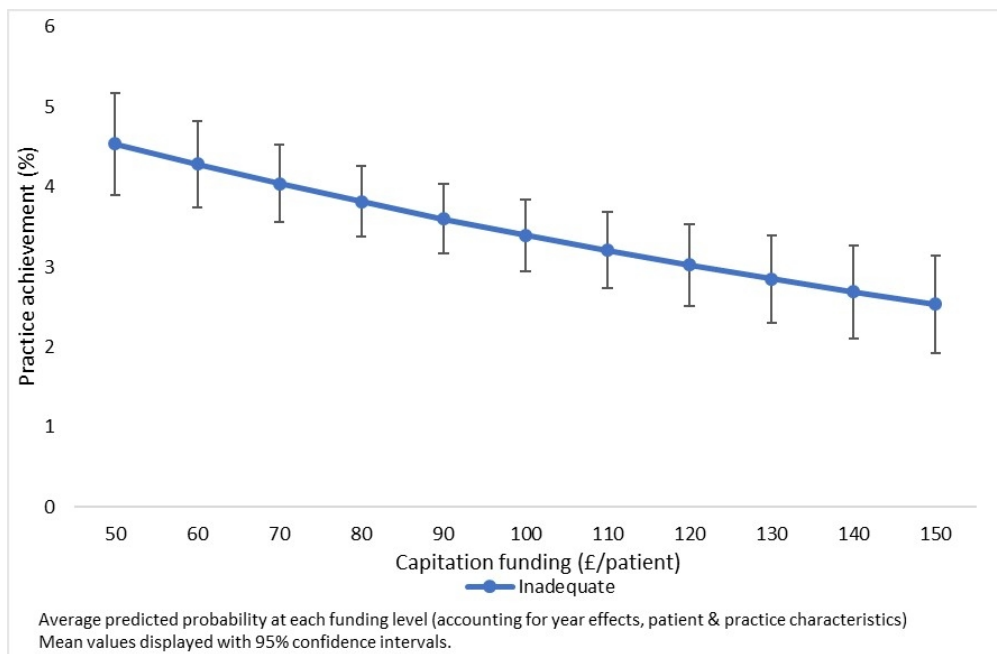

Figure 4: Estimated probability of overall practice rating of 'Inadequate' at various levels of capitation funding per registered patient

150x98mm (150 x 150 DPI)

1  
2  
3  
4  
5  
6  
7  
8  
9  
10  
11  
12  
13  
14  
15  
16  
17  
18  
19  
20  
21  
22  
23  
24  
25  
26  
27  
28  
29  
30  
31  
32  
33  
34  
35  
36  
37  
38  
39  
40  
41  
42  
43  
44  
45  
46  
47  
48  
49  
50  
51  
52  
53  
54  
55  
56  
57  
58  
59  
60

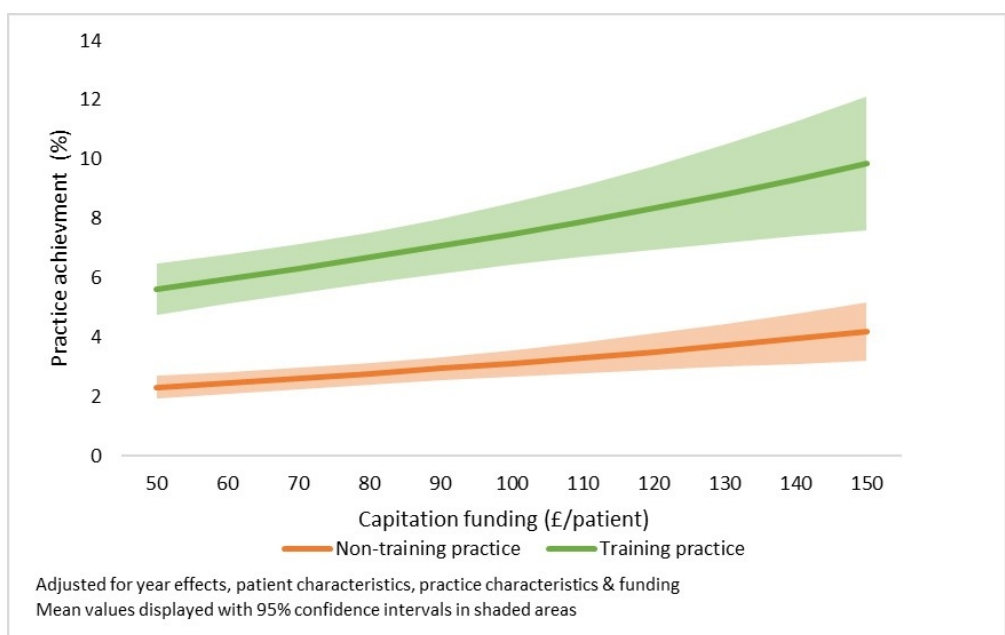

Figure 5: Estimated probability of 'Outstanding' overall practice CQC rating: training versus non-training practices

147x93mm (150 x 150 DPI)

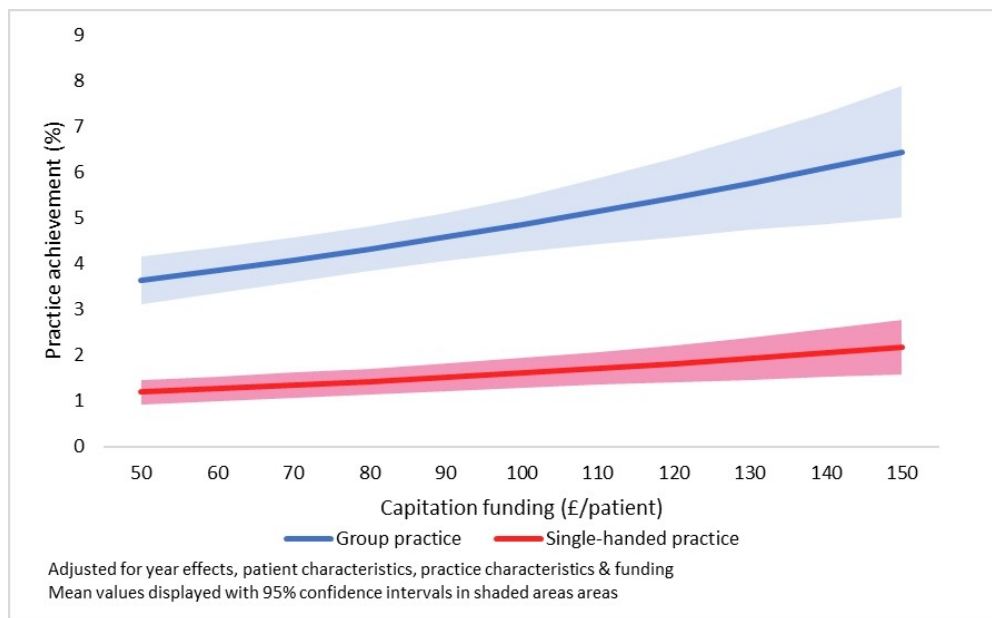

Figure 6: Estimated probability of 'Outstanding' overall practice CQC rating: single-handed versus group practices

152x93mm (150 x 150 DPI)

1  
2  
3  
4  
5  
6  
7  
8  
9  
10  
11  
12  
13  
14  
15  
16  
17  
18  
19  
20  
21  
22  
23  
24  
25  
26  
27  
28  
29  
30  
31  
32  
33  
34  
35  
36  
37  
38  
39  
40  
41  
42  
43  
44  
45  
46  
47  
48  
49  
50  
51  
52  
53  
54  
55  
56  
57  
58  
59  
60

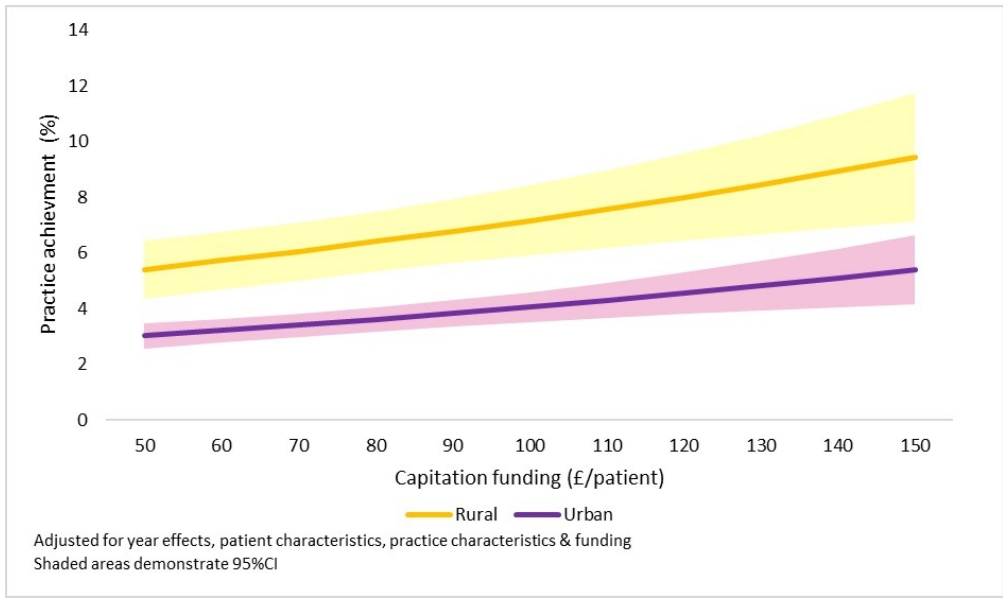

Figure 7: Estimated probability of 'Outstanding' overall practice CQC rating: rural and urban practices

159x94mm (150 x 150 DPI)

## STROBE Statement—checklist of items that should be included in reports of observational studies

|                           | Item No. | Recommendation                                                                                                                                                                                                                                                                                                                                                                                                                                                         | Page No. | Relevant text from manuscript                                                                                            |
|---------------------------|----------|------------------------------------------------------------------------------------------------------------------------------------------------------------------------------------------------------------------------------------------------------------------------------------------------------------------------------------------------------------------------------------------------------------------------------------------------------------------------|----------|--------------------------------------------------------------------------------------------------------------------------|
| <b>Title and abstract</b> | 1        | (a) Indicate the study's design with a commonly used term in the title or the abstract                                                                                                                                                                                                                                                                                                                                                                                 | 1        | “Cross-sectional study”                                                                                                  |
|                           |          | (b) Provide in the abstract an informative and balanced summary of what was done and what was found                                                                                                                                                                                                                                                                                                                                                                    | 1        | Summarised in Abstract:<br>Design, Participants, Main outcome measures, Results                                          |
| <b>Introduction</b>       |          |                                                                                                                                                                                                                                                                                                                                                                                                                                                                        |          |                                                                                                                          |
| Background/rationale      | 2        | Explain the scientific background and rationale for the investigation being reported                                                                                                                                                                                                                                                                                                                                                                                   | 2-3      | The link between measured dimensions of quality and primary care funding data                                            |
| Objectives                | 3        | State specific objectives, including any prespecified hypotheses                                                                                                                                                                                                                                                                                                                                                                                                       | 3        | “we assess the relationship of practice capitation funding with overall CQC ratings and with the individual CQC domains” |
| <b>Methods</b>            |          |                                                                                                                                                                                                                                                                                                                                                                                                                                                                        |          |                                                                                                                          |
| Study design              | 4        | Present key elements of study design early in the paper                                                                                                                                                                                                                                                                                                                                                                                                                | 5        | Presented under 'Sample'.                                                                                                |
| Setting                   | 5        | Describe the setting, locations, and relevant dates, including periods of recruitment, exposure, follow-up, and data collection                                                                                                                                                                                                                                                                                                                                        | 3        | Presented under 'Data Sources'                                                                                           |
| Participants              | 6        | (a) <i>Cohort study</i> —Give the eligibility criteria, and the sources and methods of selection of participants. Describe methods of follow-up<br><i>Case-control study</i> —Give the eligibility criteria, and the sources and methods of case ascertainment and control selection. Give the rationale for the choice of cases and controls<br><i>Cross-sectional study</i> —Give the eligibility criteria, and the sources and methods of selection of participants | 5        | Cross-sectional study: general practice eligibility criteria summarised under 'Sample'                                   |
|                           |          | (b) <i>Cohort study</i> —For matched studies, give matching criteria and number of exposed and unexposed<br><i>Case-control study</i> —For matched studies, give matching criteria and the number of controls per case                                                                                                                                                                                                                                                 |          |                                                                                                                          |

|                              |    |                                                                                                                                                                                      |     |                                                                                                                                                                    |
|------------------------------|----|--------------------------------------------------------------------------------------------------------------------------------------------------------------------------------------|-----|--------------------------------------------------------------------------------------------------------------------------------------------------------------------|
| Variables                    | 7  | Clearly define all outcomes, exposures, predictors, potential confounders, and effect modifiers. Give diagnostic criteria, if applicable                                             | 4/5 | Practice variables summarised under the heading 'practice data'; funding variables summarised under the heading 'practice funding data'                            |
| Data sources/<br>measurement | 8* | For each variable of interest, give sources of data and details of methods of assessment (measurement). Describe comparability of assessment methods if there is more than one group | 3   | All sources of data listed under the heading, 'Data Sources'                                                                                                       |
| Bias                         | 9  | Describe any efforts to address potential sources of bias                                                                                                                            | 4   | The large no. of variables included in our regression model are designed to maximise the explanatory power of the model                                            |
| Study size                   | 10 | Explain how the study size was arrived at                                                                                                                                            | 5   | Included practices represent ALL practices, minus exclusions based on predetermined exclusion criteria. Only lack of data availability restricted the sample size. |

Continued on next page

For peer review only

|                        |     |                                                                                                                                                                                                                                                                                                           |     |                                                                                              |
|------------------------|-----|-----------------------------------------------------------------------------------------------------------------------------------------------------------------------------------------------------------------------------------------------------------------------------------------------------------|-----|----------------------------------------------------------------------------------------------|
| Quantitative variables | 11  | Explain how quantitative variables were handled in the analyses. If applicable, describe which groupings were chosen and why                                                                                                                                                                              | 5/6 | Quantitative variables analysed according to description in section headed, 'Data Analysis'. |
| Statistical methods    | 12  | (a) Describe all statistical methods, including those used to control for confounding                                                                                                                                                                                                                     | 5/6 | Regression modelling – see Data Analysis                                                     |
|                        |     | (b) Describe any methods used to examine subgroups and interactions                                                                                                                                                                                                                                       | 6   | Sub-groups such as 'outstanding' or 'inadequate' practices identified                        |
|                        |     | (c) Explain how missing data were addressed                                                                                                                                                                                                                                                               | 5/6 | Practices excluded if missing data                                                           |
|                        |     | (d) <i>Cohort study</i> —If applicable, explain how loss to follow-up was addressed<br><i>Case-control study</i> —If applicable, explain how matching of cases and controls was addressed<br><i>Cross-sectional study</i> —If applicable, describe analytical methods taking account of sampling strategy | n/a | The study was not a sample                                                                   |
|                        |     | (e) Describe any sensitivity analyses                                                                                                                                                                                                                                                                     | 8   | See heading 'Sensitivity analyses'                                                           |
| <b>Results</b>         |     |                                                                                                                                                                                                                                                                                                           |     |                                                                                              |
| Participants           | 13* | (a) Report numbers of individuals at each stage of study—eg numbers potentially eligible, examined for eligibility, confirmed eligible, included in the study, completing follow-up, and analysed                                                                                                         | 5   | Summarised under 'sample'. 7310 practices in England; 54 excluded.                           |
|                        |     | (b) Give reasons for non-participation at each stage                                                                                                                                                                                                                                                      | n/a | n/a (exclusion criteria stated above)                                                        |
|                        |     | (c) Consider use of a flow diagram                                                                                                                                                                                                                                                                        | n/a | Exclusion criteria summarised on pg5 without use of a Flow diagram                           |
| Descriptive data       | 14* | (a) Give characteristics of study participants (eg demographic, clinical, social) and information on exposures and potential confounders                                                                                                                                                                  | 13  | Table 2 summarises, 'Characteristics of general practices and their populations in England'  |
|                        |     | (b) Indicate number of participants with missing data for each variable of interest                                                                                                                                                                                                                       | n/a | Sample only included those with available data                                               |
|                        |     | (c) <i>Cohort study</i> —Summarise follow-up time (eg, average and total amount)                                                                                                                                                                                                                          | n/a |                                                                                              |
| Outcome data           | 15* | <i>Cohort study</i> —Report numbers of outcome events or summary measures over time                                                                                                                                                                                                                       | n/a |                                                                                              |
|                        |     | <i>Case-control study</i> —Report numbers in each exposure category, or summary measures of exposure                                                                                                                                                                                                      | n/a |                                                                                              |
|                        |     | <i>Cross-sectional study</i> —Report numbers of outcome events or summary measures                                                                                                                                                                                                                        | 13  | Summary measures in Table 2                                                                  |
| Main results           | 16  | (a) Give unadjusted estimates and, if applicable, confounder-adjusted estimates and their precision (eg, 95% confidence interval). Make clear which confounders were adjusted for and why they were included                                                                                              | 14  | Table 4 summarises 'unadjusted' and three levels of 'adjusted' analyses                      |



1  
2  
3  
4  
5  
6  
7  
8  
9

|  |                                                                                                                  |     |                                                          |
|--|------------------------------------------------------------------------------------------------------------------|-----|----------------------------------------------------------|
|  |                                                                                                                  | 15  | Confounders adjusted for are listed in Table 5           |
|  | (b) Report category boundaries when continuous variables were categorized                                        | n/a | No categorisation of continual variables                 |
|  | (c) If relevant, consider translating estimates of relative risk into absolute risk for a meaningful time period | n/a | Absolute financial values are presented in the findings. |

Continued on next page

10  
11  
12  
13  
14  
15  
16  
17  
18  
19  
20  
21  
22  
23  
24  
25  
26  
27  
28  
29  
30  
31  
32  
33  
34  
35  
36  
37  
38  
39  
40  
41  
42

For peer review only

43  
44  
45  
46

|                          |    |                                                                                                                                                                            |                       |                                                                                                                                                                                                                                   |
|--------------------------|----|----------------------------------------------------------------------------------------------------------------------------------------------------------------------------|-----------------------|-----------------------------------------------------------------------------------------------------------------------------------------------------------------------------------------------------------------------------------|
| Other analyses           | 17 | Report other analyses done—eg analyses of subgroups and interactions, and sensitivity analyses                                                                             | 8                     | Sensitivity analyses summarised                                                                                                                                                                                                   |
| <b>Discussion</b>        |    |                                                                                                                                                                            |                       |                                                                                                                                                                                                                                   |
| Key results              | 18 | Summarise key results with reference to study objectives                                                                                                                   | 9                     | Key finding summarised at opening of Discussion: ‘This study has demonstrated that higher capitation funding is associated with significantly higher overall practice quality ratings and ratings across all individual domains.’ |
| Limitations              | 19 | Discuss limitations of the study, taking into account sources of potential bias or imprecision. Discuss both direction and magnitude of any potential bias                 | 10                    | Discussed under heading, ‘Strengths and Weaknesses of the study’                                                                                                                                                                  |
| Interpretation           | 20 | Give a cautious overall interpretation of results considering objectives, limitations, multiplicity of analyses, results from similar studies, and other relevant evidence | 10/11                 | Cautious interpretation summarised with reference to the literature                                                                                                                                                               |
| Generalisability         | 21 | Discuss the generalisability (external validity) of the study results                                                                                                      | 11                    | Summarised under, ‘Implications for policy and practice’                                                                                                                                                                          |
| <b>Other information</b> |    |                                                                                                                                                                            |                       |                                                                                                                                                                                                                                   |
| Funding                  | 22 | Give the source of funding and the role of the funders for the present study and, if applicable, for the original study on which the present article is based              | In submission details | First author is funded as Doctoral Research Fellow (DRF) by NIHR                                                                                                                                                                  |

\*Give information separately for cases and controls in case-control studies and, if applicable, for exposed and unexposed groups in cohort and cross-sectional studies.

**Note:** An Explanation and Elaboration article discusses each checklist item and gives methodological background and published examples of transparent reporting. The STROBE checklist is best used in conjunction with this article (freely available on the Web sites of PLoS Medicine at <http://www.plosmedicine.org/>, Annals of Internal Medicine at <http://www.annals.org/>, and Epidemiology at <http://www.epidem.com/>). Information on the STROBE Initiative is available at [www.strobe-statement.org](http://www.strobe-statement.org).

# BMJ Open

## The relationship between general practice capitation funding and the quality of primary care in England: a cross-sectional, three-year study

|                                 |                                                                                                                                                                                                                                                                                                                                                                                                                                                        |
|---------------------------------|--------------------------------------------------------------------------------------------------------------------------------------------------------------------------------------------------------------------------------------------------------------------------------------------------------------------------------------------------------------------------------------------------------------------------------------------------------|
| Journal:                        | <i>BMJ Open</i>                                                                                                                                                                                                                                                                                                                                                                                                                                        |
| Manuscript ID                   | bmjopen-2019-030624.R2                                                                                                                                                                                                                                                                                                                                                                                                                                 |
| Article Type:                   | Original research                                                                                                                                                                                                                                                                                                                                                                                                                                      |
| Date Submitted by the Author:   | 27-Sep-2019                                                                                                                                                                                                                                                                                                                                                                                                                                            |
| Complete List of Authors:       | L'Esperance, Veline; King's College London, UK, School of Population Health and Environmental Sciences<br>Gravelle, Hugh; University of York, Centre for Health Economics<br>Schofield, Peter; King's College London, UK, School of Population Health and Environmental Sciences<br>Santos, Rita; University of York, Centre for Health Economics<br>Ashworth, Mark; King's College London, UK, School of Population Health and Environmental Sciences |
| <b>Primary Subject Heading</b>: | General practice / Family practice                                                                                                                                                                                                                                                                                                                                                                                                                     |
| Secondary Subject Heading:      | Health economics, Health policy, Health services research                                                                                                                                                                                                                                                                                                                                                                                              |
| Keywords:                       | PRIMARY CARE, Quality in health care < HEALTH SERVICES ADMINISTRATION & MANAGEMENT, HEALTH ECONOMICS, Health inequalities, primary care funding, general practice                                                                                                                                                                                                                                                                                      |
|                                 |                                                                                                                                                                                                                                                                                                                                                                                                                                                        |

SCHOLARONE™  
Manuscripts

**Title:**

**The relationship between general practice capitation funding and the quality of primary care in England: a cross-sectional, three-year study**

**Authors:**

Veline L'Esperance<sup>1</sup>, Hugh Gravelle<sup>2</sup>, Peter Schofield<sup>3</sup>, Rita Santos<sup>4</sup>, Mark Ashworth<sup>5</sup>

1. Doctoral Research Fellow, School of Population Health & Environmental Sciences, Kings College London, London, UK
  2. Professor of Economics, Centre for Health Economics, University of York, York, UK
  3. Wolfson Lecturer, School of Population Health & Environmental Sciences, Kings College London, London, UK
  4. Research Fellow, Centre for Health Economics, University of York, York, UK
  5. Reader in Primary Care, School of Population Health & Environmental Sciences, Kings College London, London, UK
- Corresponding author email: [veline.lesperance@kcl.ac.uk](mailto:veline.lesperance@kcl.ac.uk)

**Abstract:**

**Objective** To explore the relationship between general practice capitation funding and quality ratings based on general practice inspections.

**Design** Cross-sectional study pooling three years of primary care administrative data.

**Setting** UK primary care.

**Participants** 7310 practices (95% of all practices) in England which underwent Care Quality Commission (CQC) inspections between November 2014 and December 2017.

**Main outcome measures** CQC ratings. Ordered logistic regression methods were used to predict the relationship between practice capitation funding and CQC ratings in each of five domains of quality: caring, effective, responsive, safe and well-led, together with an overall practice rating.

**Results** Higher capitation funding per patient was significantly associated with higher CQC ratings across all five quality domains; caring (odds ratio [OR] 1.14, 95% confidence interval [CI]: 1.04 to 1.23); effective (OR 1.08, 95% CI: 1.00 to 1.16); responsive (OR 1.09, 95%CI:

1  
2  
3 1.02 to 1.17); safe (OR 1.11, 95% CI: 1.05 to 1.18); well-led (OR 1.13, 95% CI: 1.06 to 1.20);  
4  
5 and overall rating (OR 1.13, 95% CI: 1.06 to 1.19).  
6  
7

8 **Conclusion:** Higher capitation funding was consistently associated with higher ratings across  
9  
10 all CQC domains and in the overall practice rating. This study suggests that measured  
11  
12 dimensions of the quality of care are related to the underlying capitation funding allocated  
13  
14 to each general practice, implying that additional capitation funding may be associated with  
15  
16 higher levels of primary care quality.  
17  
18  
19  
20  
21  
22

### 23 **Strengths and limitations**

- 24
- 25 • A cross-sectional study covering three years of primary care data
- 26
- 27
- 28 • The definition of primary care quality used in this study was multidimensional,  
29  
30 based on inspection findings and covering patient safety, patient experience, clinical  
31  
32 effectiveness.  
33
- 34
- 35 • The association between the achievement of quality ratings and practice capitation  
36  
37 funding was explored, adjusted for known confounders  
38
- 39
- 40 • Although based on a near complete sample of general practices in England, bias may  
41  
42 have been introduced by data coding and recording errors  
43  
44
- 45 • Longer term and prospective studies are required to strengthen causal inferences  
46  
47  
48  
49  
50  
51  
52  
53  
54  
55  
56  
57  
58  
59  
60

## Introduction

Improving the quality of care is a major focus of UK government health policy(1). High quality health care has three main components: clinical achievement, patient experience and patient safety(2). There is wide variation between general practices in the achievement of clinical care quality indicators and patient reported satisfaction(3, 4).

It is important to understand whether variations in the quality of care provided across practices are related to variations in their funding. Healthcare quality regulation in England is currently undertaken by the Care Quality Commission, focuses on outcomes for patients and has a wide range of enforcement powers, including closure and deregistration of services, if essential standards are not met.(5)

Studies of the relationship between quality and funding in English general practices have largely focussed on the Quality and Outcomes Framework (QOF) which rewards practices for higher quality care, as defined by the achievement of clinical process and outcome targets. The QOF has had limited impact on reducing secondary care costs(6) or improving primary care performance(7, 8). In terms of financial incentivisation, the QOF accounted for approximately 7.8% of funding received by general practices in England in 2016(9). In contrast, capitation payments represent the largest proportion of funding to general practice (54% in 2016) and are related to the number of registered patients in each practice(9), adjusted for factors thought to increase the demand on primary care services(10). Other components of general practice funding include additional payments for postgraduate training, the provision of additional clinical services ('enhanced services') and various

1  
2  
3 reimbursements to cover the costs of premises, computers and for some practices, dispensing  
4  
5 medication(11).  
6  
7

8  
9 Greater capitation spending on general practices has been found to be associated with  
10  
11 reductions in secondary care usage and costs, and increased patient satisfaction(12). Studies  
12  
13 have also shown that leadership within the practice organisation plays a key role in the  
14  
15 delivery of high quality care(13). Until recently, nationally derived metrics of inspection-based  
16  
17 primary care quality were unavailable. Since October 2014 all general practices have been  
18  
19 subjected to inspections by the Care Quality Commission (CQC) (14), (5). The CQC reports on  
20  
21 the extent to which practices are caring, effective, responsive to the needs of patients, safe,  
22  
23 and well-led(5, 15) and also combines these five domains to produce an overall practice  
24  
25 rating. These five domains incorporate components of clinical achievement, patient  
26  
27 experience and patient safety(2). In this study, we assess the relationship of practice  
28  
29 capitation funding with overall CQC ratings and with the individual CQC domains. We aimed  
30  
31 to examine the relationship between practice funding and the quality of care as determined  
32  
33 by inspection-based quality assessment. Analysis of total practice funding would have  
34  
35 introduced confounding through inclusion of quality-related payments. We therefore used  
36  
37 capitation funding as our measure of practice funding since this financial indicator is  
38  
39 independent of financial rewards associated with quality achievement such as the QOF and  
40  
41 other national and local incentive schemes.  
42  
43  
44  
45  
46  
47  
48  
49  
50  
51

## 52 **Methods**

### 53 ***Data sources***

54  
55 We linked practice-level data on NHS payments to general practice identifiers(16), CQC  
56  
57 inspection ratings(15), NHS administrative datasets, General and Personal Medical Services  
58  
59  
60

1  
2  
3 Statistics (17), and small area Census and socio-economic data from Neighbourhood  
4  
5  
6 Statistics(18).

### 10 ***Care Quality Commission Ratings***

11  
12 CQC ratings are based on publicly available data (such as QOF and General Practice Patient  
13  
14 Survey(19)), practice inspections, interviews with patients and staff, complaints, clinical  
15  
16 record reviews, reviews of practice documents and policies(15). We used CQC ratings for  
17  
18 practices with completed CQC reports first inspected between November 2014 and December  
19  
20 2017 (n = 7310, 95% of all practices). Practice ratings were obtained from the CQC; these data  
21  
22 are publicly available on request. For practices which required reinspection only the first  
23  
24 inspection score was included in the analysis. The five domains of quality described by CQC  
25  
26 inspections are summarised in Table 1; each is rated on a 4-point scale.

### 33 ***Practice data***

34  
35  
36 Data for all general practices in England were obtained from the General and Personal  
37  
38 Medical Services database, for 2014/15, 2015/16 and 2016/17 financial years (17). These data  
39  
40 are publicly available from NHS Digital. Our use of practice based demographic data followed  
41  
42 a previously used methodology(20). Patient characteristics included the proportion of  
43  
44 patients aged 0 to 4 years, proportion of patients aged 75 years or older and proportion of  
45  
46 nursing home patients. Deprivation data for each general practice was attributed as the mean  
47  
48 of the Index of Multiple Deprivation (IMD) 2015(18) weighted by the proportion of practice  
49  
50 patients resident in each Lower Layer Super Output area (LLSOA). Neighbourhood ethnicity  
51  
52 (proportion Asian or black) derived from the 2011 national census, was attributed to practices  
53  
54 weighted by the proportion of the practice population in each LLSOA(21). The following  
55  
56  
57  
58  
59  
60



1  
2  
3 practice characteristics were included: region (North, Midlands, London and South), contract  
4 type (General Medical Services or Personal Medical Services), minimum distance from an  
5 acute hospital, dispensing status (whether the practice dispensed as well as prescribed  
6 medication), singlehanded practice status (singlehanded practices have  $\leq 1.0$  FTE GP; group  
7 practices have  $> 1.0$  FTE GPs) and training practice status. We did not include practice staffing  
8 (GPs, nurses, other staff) as explanatory variables in the model because staffing is likely to be  
9 directly affected by practice capitation funding and so inclusion of these variable may lead to  
10 an underestimate of the full effect of capitation funding. Moreover, a major change in the  
11 way in which staffing data was collected in 2015/16 would have resulted in a large reduction  
12 in observation number.

### 29 ***Practice capitation***

31 Practice capitation funding depends on the total number of practice patients adjusted to  
32 reflect factors affecting GP workload (age, gender, patients in nursing and residential homes,  
33 small area measures of morbidity), rurality and an index of local staff costs which affect the  
34 cost of providing services(10). Data was available for the financial years 2014/15, 2015/16  
35 and 2016/7(22). We use the mean capitation payment per patient for the year prior to  
36 inspection and the year in which the practice was inspected.

### 48 ***Sample***

50 We linked inspected practices (n=7310) with funding data for their year of inspection. We  
51 excluded atypical practices with  $\leq 750$  registered patients (n=10) or  $\leq 500$  patients per FTE GP  
52 (n= 8) following a previously used method(23). Practices with recorded negative (n= 2) or  
53 zero funding (n = 52) were excluded. The final analysis sample consisted of 7238 practices.

### **Data Analysis**

Analysis was conducted at GP practice level. Since the CQC rating outcomes are ordered categories we used ordered logistic regression to model the relationship between funding and the practice CQC ratings(24). Separate models were estimated for each domain.

The key explanatory variable was capitation funding per patient (measured in standard deviation units). We also include patient and practice characteristic covariates, thereby reducing the risk of bias from the omission of variables which might affect the CQC rating and are correlated with practice capitation funding. The regression models included year effects to allow for inspection year and annual general practice funding uplifts. We accounted for local area effects by adjusting for clustering at Clinical Commissioning Group (CCG) level. Multicollinearity was tested for by calculating the Variance Inflation Factor (VIF) and variables with a value for  $VIF > 5$  were excluded. The proportional odds assumption of the ordered logit model was also tested(25). We report the odds ratio from the estimated models.

We calculated the average marginal effects of funding on the predicted probabilities of achieving overall ratings of “outstanding” and “inadequate” for all practices. We also compared the predicted probabilities of an “outstanding” overall rating at different practice capitation funding levels for training versus non-training practices, single-handed versus multi-handed practices, and rural versus urban practices. STATA 14 (StataCorp, College Station, TX) was used for all statistical analyses.

### **Patient involvement**

1  
2  
3 Funding for this study included funding of a dedicated patient involvement group. Patients  
4  
5 were involved in developing plans for the study design, approving the outcome measures and  
6  
7 commenting on the potential impact of outcomes. A lay summary was also provided.  
8  
9

## 10 11 12 **Results**

13  
14 Summary statistics for the main characteristics of the general practices are provided in Table

15  
16  
17 2. Mean practice capitation funding per registered patient increased from £77.49 in 2014/5  
18  
19 to £83.17 in 2016/7 (Table 3). The mean capitation funding per patient across the CQC  
20  
21 inspection period was £79.48. The standard deviation of the mean capitation funding per  
22  
23 patient was £22.00.  
24  
25

26  
27  
28 The distribution of practice ratings across each quality domain is shown in Figure 1. A total of  
29  
30 79% (n = 5774) of practices achieved an overall rating of 'Good', while only 4% (294) achieved  
31  
32 an overall rating of 'Outstanding'. 'Inadequate' ratings varied across the domains, from 1%  
33  
34 (caring domain) to 6% (safety domain) and 4% (overall).  
35  
36

37  
38  
39 Figure 2 shows the difference in capitation funding for practices with the lowest quality rating  
40  
41 compared to those with the highest quality rating. In each domain, 'Inadequate' practices  
42  
43 received less capitation funding. Using an independent group t-test this difference was found  
44  
45 to be significant for three domains (caring, safe, well-led) and for the overall practice rating.  
46  
47  
48

49  
50  
51 Table 4 reports the odds ratios on capitation funding per patient estimated from four  
52  
53 regression models of overall practice CQC rating. The odds ratio on capitation funding per  
54  
55 patient is reported in standard deviation (SD units). In the first model capitation funding is  
56  
57 the only explanatory variable (unadjusted model); remaining models are adjusted for  
58  
59  
60

1  
2  
3 inclusion of successive additional explanatory variables: year effects, patient characteristics,  
4 and practice characteristics. The unadjusted model shows an association between higher  
5 capitation funding and higher overall CQC ratings with an odds ratio (OR) of 1.09 (95%  
6 confidence interval (CI): 1.03 to 1.15). Allowing for the year of inspection increased the OR  
7 slightly to 1.10 (95%CI: 1.04 to 1.16). Additional allowance for patient characteristics (OR 1.13;  
8 95%CI: 1.06 to 1.19) and practice characteristics (OR 1.13; 95%CI: 1.06 to 1.19) further  
9 increased the odds ratio. The number of observations in Table 4 fell from 7,168 to 7,045  
10 because of missing data. Very similar changes in odds ratios across the models were observed  
11 when all models were restricted to equal sample sizes. A likelihood ratio test demonstrated  
12 that the addition of patient and practice variables create a statistically significant  
13 improvement in model fit, confirming that higher odds ratios were associated with the  
14 addition of model variables, rather than to a change in sample size.  
15  
16  
17  
18  
19  
20  
21  
22  
23  
24  
25  
26  
27  
28  
29  
30  
31  
32  
33

34 The final adjusted model indicates that for a one standard deviation increase in capitation  
35 funding, the odds of achieving an outstanding CQC rating are 1.13 times greater, given that  
36 other variables are held constant. We have also shown the estimated changes in the  
37 probabilities of achieving 'inadequate' and 'outstanding' CQC ratings implied by this model in  
38 Figures 3 to 7.  
39  
40  
41  
42  
43  
44  
45  
46  
47

48 Table 5 reports odds ratios for all the explanatory variables in the overall practice quality  
49 rating model (Model 4, Table 4). In addition to higher practice capitation funding, rural  
50 practice and training practice status were significantly associated with higher overall practice  
51 ratings. For example, the adjusted odds ratio of a training practice achieving an 'outstanding'  
52  
53  
54  
55  
56  
57  
58  
59  
60

1  
2  
3 CQC rating is 2.30 times greater than for a non-training practice. Conversely, for singlehanded  
4  
5 practices the odds of achieving an 'outstanding' rating is 0.53 times that for group practices.  
6  
7

8  
9  
10 The odds ratios for capitation funding per patient from the full models for each CQC domain  
11  
12 are shown in Table 6. Higher capitation funding was significantly associated with higher CQC  
13  
14 ratings across all five quality domains.  
15  
16

17  
18  
19 We used the results from the ordered logistic regression models with the full set of  
20  
21 explanatory variables to calculate the probability of achieving an overall practice rating of  
22  
23 'Outstanding' or 'Inadequate' at different levels of capitation funding. Figure 3 shows the  
24  
25 average predicted probability of achieving an 'Outstanding' rating for a range of per capita  
26  
27 funding levels. The probabilities are the average of the estimated probabilities for each  
28  
29 practice calculated at each funding level using actual values of the practice non-funding  
30  
31 characteristics (year effects, patient characteristics and practice characteristics). Figure 4  
32  
33 shows the average predicted probability of achieving an 'Inadequate' practice rating. Higher  
34  
35 capitation funding was associated with reduced probability of achieving an 'Inadequate'  
36  
37 rating and increased probability of an 'Outstanding' quality rating. At capitation payments  
38  
39 above £100 per patient, practices have a greater probability of being rated as "Outstanding"  
40  
41 rather than "Inadequate".  
42  
43  
44  
45  
46  
47  
48  
49

50 We also compared the probability of achieving an 'Outstanding' rating at different levels of  
51  
52 practice capitation funding for training versus non-training practices (Figure 5), for single-  
53  
54 handed versus group practices (Figure 6), and for rural versus urban practices (Figure 7). At  
55  
56 all levels of funding, the probability of achieving an 'Outstanding' rating is higher for training  
57  
58 practices than non-training practices, for group practices than single handed practices, and  
59  
60

1  
2  
3 rural practices than urban practices. In all cases higher capitation funding is associated with  
4  
5 higher probabilities of an 'Outstanding' rating.  
6  
7  
8  
9

### 10 **Sensitivity Analyses**

11  
12 The Brant test(25) assesses the proportional odds assumption that the distance between each  
13  
14 category is equivalent. Four of the variables included in our model (region, proportion of  
15  
16 patients aged 0-4 years, contract type and single-hander status) did not meet the assumption  
17  
18 of proportionality of the odds ratios. However, our variable of interest, capitation funding per  
19  
20 patient, did not violate the proportional odds assumption. A partial proportional odds model  
21  
22 excluding these four variables, estimated by generalised ordered logistic regression, yielded  
23  
24 similar results to our main model: higher capitation funding was significantly associated with  
25  
26 increase probability of achieving an 'Outstanding' rating (OR 1.14, 95% CI: 1.04 to 1.25).  
27  
28  
29  
30  
31  
32  
33

### 34 **Discussion**

35  
36 This study has demonstrated that higher capitation funding is associated with significantly  
37  
38 higher overall practice quality ratings and ratings across all individual domains.  
39  
40  
41  
42

43 Practice characteristics such as post-graduate training practice and group practice status were  
44  
45 also associated with higher quality ratings, representing primary care structures which  
46  
47 support higher quality of care. However, some factors related to the registered practice  
48  
49 population, such as urban location, social deprivation and larger proportions of ethnic  
50  
51 minority patients were negatively associated with the practice quality of care rating. Many of  
52  
53 these factors are already known to be negatively associated with reported patient satisfaction  
54  
55 (26) and QOF achievement (27). Including them in the model led to a stronger association of  
56  
57 practice capitation funding with practice quality rating. The likely reason for this is that  
58  
59  
60

1  
2  
3 practice capitation funding is positively correlated with patient characteristics which have  
4  
5 negative effects on the quality rating. Thus, including these patient characteristics in the  
6  
7 model removes a source of bias from omitted variables which would otherwise tend to  
8  
9 underestimate the positive association of funding with the quality rating.  
10  
11  
12  
13

### 14 15 **Strengths and weaknesses of the study**

16  
17 This is the first study to explore the relationship between practice-level capitation funding  
18  
19 and practice quality as measured by CQC ratings. The findings are based on a near complete  
20  
21 sample of general practices across England. Using data linkages from a wide range of sources,  
22  
23 and multilevel statistical models, this study has been able to demonstrate the independent  
24  
25 effects of practice funding and practice characteristics on quality ratings, which might  
26  
27 otherwise be confounded in single-level analyses. A variety of sensitivity analyses have  
28  
29 confirmed the robustness of the ordered logistic regression modelling.  
30  
31  
32  
33

34  
35 However, there are several limitations. Routinely collected data are subject to coding and  
36  
37 recording errors. As with all observational studies, significant associations, even if large, may  
38  
39 not be causal. Although a wide range of potential confounders were included in the models,  
40  
41 confounding by omitted variables cannot be excluded.  
42  
43  
44  
45

### 46 47 **Comparison with existing literature**

48  
49 These findings complement those of a previous study which found that increased general  
50  
51 practice capitation funding was associated with reduced emergency hospital admissions and  
52  
53 Accident and Emergency attendances(12).  
54  
55  
56  
57  
58  
59  
60

1  
2  
3 In a country level European analysis it was found that systems relying on capitation funding  
4  
5 were more responsive than those based on fee for service or mixed payment(28). However,  
6  
7 analysis of Scottish general practices suggests that capitation funding may contribute to the  
8  
9 persistence of the inverse care law with deprived areas experiencing lower quality of care, as  
10  
11 defined by inspection ratings(29). Consistent with our study, others have found that GP  
12  
13 practice funding is negatively correlated with healthcare need predictors such as deprivation  
14  
15 and non-white ethnicity(30). Previous studies have also demonstrated that greater GP  
16  
17 workload may be associated with higher levels of social deprivation and with a higher  
18  
19 proportion of Asian patients(31). Similarly, practices with a greater proportion of ethnically  
20  
21 diverse patients reported worse patient experience(32). Our work is also consistent with a  
22  
23 recent study which demonstrated that GPs co-located with other GPs and professionals had  
24  
25 improved outcomes compared with single-handed GP practices such as broader provision of  
26  
27 technical procedures, wider coordination with secondary care and increased collaboration  
28  
29 among different providers (33).

30  
31  
32  
33  
34  
35  
36  
37  
38  
39 Our study was based on funding data for general practices but was unable to study the  
40  
41 relationship between quality ratings and individual GP income. However, values for overall  
42  
43 'profit' per practice are expected to become available in due course. Other studies have  
44  
45 confirmed that incentives based on personal income may influence both quality achievement  
46  
47 and productivity(34).  
48  
49  
50  
51  
52

### 53 **Implications for policy and practice**

54  
55 This work provides further evidence of the association between general practice capitation  
56  
57 funding and the quality of primary care. A causal association is plausible and supports the  
58  
59  
60



1  
2  
3 argument that increased quality and safety of patient care may be achieved through  
4  
5 additional investment. The recently published NHS Long Term Plan(35) outlines proposals to  
6  
7 offer increases in capitation payment together with an emphasis on inter-practice  
8  
9 cooperation through the formation of primary care networks. Both factors are likely to  
10  
11 influence the relationship between funding and the quality of primary care and will require  
12  
13 further study. Our findings suggest that revisions to the primary care capitation formula are  
14  
15 necessary to ensure that additional funding is provided in urban areas of high deprivation and  
16  
17 ethnic minority populations in order to address quality of care inequalities.  
18  
19  
20  
21  
22  
23

### 24 **Unanswered questions and future research**

25  
26  
27 Future research could extend similar analyses to subsequent 3-year cycles of quality  
28  
29 inspection. A longitudinal approach, relating changes in funding to changes in outcomes, is  
30  
31 likely to provide more accurate estimates of the effect of funding. Complementary qualitative  
32  
33 analysis is likely to provide insight into mechanisms underlying the link between better  
34  
35 funded practices and higher quality rating achievement.  
36  
37  
38  
39  
40

### 41 **Conclusion**

42  
43 Higher capitation funding was consistently associated with higher overall and domain quality  
44  
45 ratings yielded by CQC inspections. This study suggests that measured and inspected  
46  
47 dimensions of the quality of care are related to the underlying funding allocated to each  
48  
49 general practice, implying that additional funding may be associated with higher levels of  
50  
51 primary care quality.  
52  
53  
54

### 55 **What is already known on this topic**

- 56  
57  
58 • Few studies on the relationship between capitation funding and quality  
59  
60

- 1  
2  
3 • In England, the QOF has had limited impact on reducing healthcare costs and  
4  
5 improving primary care performance  
6  
7

8 **What this study adds**  
9

- 10 • Higher capitation funding is associated with increased quality ratings across all  
11 domains  
12  
13 • Since the NHS Long Term Plan calls for increased funding to primary care it is  
14 important to understand how and where this funding should be directed  
15  
16 • Our findings imply that further primary care funding is particularly needed in areas of  
17 high deprivation and ethnic minority populations where funding may be insufficient  
18 to support high quality of care.  
19  
20  
21  
22  
23  
24  
25  
26  
27  
28  
29  
30  
31  
32  
33  
34  
35  
36  
37  
38  
39  
40  
41  
42  
43  
44  
45  
46  
47  
48  
49  
50  
51  
52  
53  
54  
55  
56  
57  
58  
59  
60

1  
2  
3 **Contributors:** VL, HG, PS, RS and MA contributed to the idea and design of the study. VL and PS led  
4 on data analysis with statistical advice from HG, RS and MA. VL produced the first draft of the paper;  
5  
6 all co-authors contributed and approved the final draft. VL is the guarantor. The corresponding  
7  
8 author attests that all listed authors meet authorship criteria and that no others meeting the criteria  
9  
10 have been omitted.  
11  
12

13  
14  
15 **Funding:** This work was supported by the National Institute for Health Research (NIHR) who  
16  
17 funded a Doctoral Research Fellowship for VL (reference, DRF-2017-10-132) and for RS  
18  
19 (reference, DRF-2014-07-055). HG and RS were funded by the UK NIHR Policy Research  
20  
21 Programme (Policy Research Unit in the Economics of Health and Social Care Systems: Ref  
22  
23 103/0001). The views expressed are those of the authors and not necessarily those of the  
24  
25 NHS, the National Institute for Health Research, the Department of Health and Social Care or  
26  
27 its arm's length bodies or other UK government departments. The findings presented are  
28  
29 independent from the funders who have had no role in study design, data collection, data  
30  
31 analysis, data interpretation, or writing of the report.  
32  
33  
34  
35

36  
37 **Competing interests:** All authors have completed the ICMJE uniform disclosure form at  
38  
39 [www.icmje.org/coi\\_disclosure.pdf](http://www.icmje.org/coi_disclosure.pdf) and declare: no support from any organisation for the  
40  
41 submitted work; no financial relationships with any organisations that might have an interest  
42  
43 in the submitted work in the previous three years; no other relationships or activities that  
44  
45 could appear to have influenced the submitted work.  
46  
47

48  
49 **Ethical approval:** Ethical approval not required for the use of aggregate practice level data as  
50  
51 included in this study.  
52

53  
54 **Dissemination declaration:** the results have been disseminated to the patient involvement  
55  
56 group involved in study design and commenting on potential impact of outcomes.  
57

58  
59 **Data sharing:** The reference for each database used in this study is provided.  
60

## Figures and Tables

**Table 1: The five key domains for CQC Inspections**

| Domain            | Description                                                                                                                                                                                                                                  |
|-------------------|----------------------------------------------------------------------------------------------------------------------------------------------------------------------------------------------------------------------------------------------|
| <b>Safe</b>       | Patients are protected from abuse and avoidable harm                                                                                                                                                                                         |
| <b>Effective</b>  | Care, treatment and support achieves good outcomes, helps patients to maintain quality of life and is based on the best available evidence                                                                                                   |
| <b>Caring</b>     | Staff involve and treat patients with compassion, kindness, dignity and respect                                                                                                                                                              |
| <b>Responsive</b> | Services are organised so that they meet patients' needs                                                                                                                                                                                     |
| <b>Well-led</b>   | The leadership, management and governance of the organisation make sure it's providing high-quality care that's based around the individual needs, that it encourages learning and innovation, and that it promotes an open and fair culture |

*Adapted from: CQC. The five key questions we ask(36)*

**Table 2. Characteristics of general practices and their populations in England**

| Variable                                              | Mean | (5th, 95th centiles) |
|-------------------------------------------------------|------|----------------------|
| Patient adjusted Index of Multiple Deprivation, 2015  | 24.5 | 8.2, 46.1            |
| Proportion of patients aged 0 to 4 years (%)          | 5.9  | 3.7, 8.8             |
| Proportion of patients aged 75 years or older (%)     | 7.7  | 2.6, 12.9            |
| Proportion of patients: nursing home residents (%)    | 0.5  | 0, 1.4               |
| Proportion of patients: Asian or black ethnicity (%)  | 13.1 | 0.1, 53.1            |
| List size per full-time equivalent (FTE) GP           | 1950 | 1066, 3315           |
| List size per FTE non-clinical employed staff         | 703  | 392, 1103            |
| List size per FTE nurse                               | 7166 | 2810, 15507          |
| Minimum distance of practice from acute hospital (km) | 3.8  | 0.4, 11.8            |
| Proportion of practices by rurality (%)               |      |                      |
| Urban                                                 | 85.5 |                      |
| Rural: hamlet, village, town & fringe                 | 14.5 |                      |
| Proportion of practices by region (%)                 |      |                      |
| North                                                 | 30.3 |                      |
| Midlands                                              | 29.4 |                      |
| London                                                | 18.0 |                      |
| South                                                 | 22.3 |                      |
| Proportion of practices by contract type (%)          |      |                      |
| General Medical Services                              | 59.4 |                      |
| Personal Medical Services                             | 40.6 |                      |
| Proportion of dispensing practices (%)                | 14.6 |                      |
| Proportion of singlehanded practices (%)              | 13.1 |                      |
| Proportion of training practices (%)                  | 30.4 |                      |

**Table 3: Capitation funding per registered patient for inspected practices**

| Inspection year | N    | Mean capitation funding | (5th, 95th centiles) |
|-----------------|------|-------------------------|----------------------|
| 2014/15         | 2232 | £77.49                  | £59.54, £99.99       |
| 2015/16         | 3790 | £80.86                  | £66.57, £101.66      |
| 2016/17         | 1148 | £83.71                  | £67.74, £106.76      |

**Table 4: Association of capitation funding per patient with overall practice CQC rating: unadjusted and adjusted regression models**

|                                                                                                                                                                                                                                                                                                                                                                                                                     | Model 1    | Model 2    | Model 3    | Model 4    |
|---------------------------------------------------------------------------------------------------------------------------------------------------------------------------------------------------------------------------------------------------------------------------------------------------------------------------------------------------------------------------------------------------------------------|------------|------------|------------|------------|
| Capitation funding odds ratio <sup>1</sup>                                                                                                                                                                                                                                                                                                                                                                          | 1.09**     | 1.10**     | 1.13***    | 1.13***    |
| 95% CI of odds ratio                                                                                                                                                                                                                                                                                                                                                                                                | 1.03, 1.15 | 1.04, 1.16 | 1.06, 1.19 | 1.06, 1.19 |
| Observations                                                                                                                                                                                                                                                                                                                                                                                                        | 7,168      | 7,168      | 7,144      | 7,045      |
| Models contain                                                                                                                                                                                                                                                                                                                                                                                                      |            |            |            |            |
| Year effects                                                                                                                                                                                                                                                                                                                                                                                                        | N          | Y          | Y          | Y          |
| Patient characteristics <sup>2</sup>                                                                                                                                                                                                                                                                                                                                                                                | N          | N          | Y          | Y          |
| Practice characteristics <sup>3</sup>                                                                                                                                                                                                                                                                                                                                                                               | N          | N          | N          | Y          |
| 1. Odds ratios based on Standard Deviation units.<br>2. Patient adjusted deprivation, proportion of patients aged 0 to 4 years, proportion of patients aged ≥75 years, proportion patients black or Asian ethnicity, proportion of nursing home residents.<br>3. Region, minimum distance to hospital, contract type, dispensing status, training practice status, singlehanded<br>*p< 0.05; **p< 0.01; ***p< 0.001 |            |            |            |            |

**Table 5: Association of capitation funding with overall practice CQC rating: predictor variable in fully adjusted model.**

| Characteristics                                        | Odds Ratio | 95% CI     |
|--------------------------------------------------------|------------|------------|
| Capitation funding per patient (SD units) <sup>1</sup> | 1.13***    | 1.06, 1.19 |
| Year 2                                                 | 0.92       | 0.80, 1.05 |
| Year 3                                                 | 0.76**     | 0.64, 0.91 |
| Deprivation                                            | 0.99**     | 0.98, 0.99 |
| Patients aged 0 to 4 years (proportion)                | 1.00       | 0.95, 1.05 |
| Patients aged 75 years or old (proportion)             | 0.99       | 0.96, 1.17 |
| Patients in nursing home (proportion)                  | 1.13*      | 1.02, 1.26 |
| Patients Asian or black ethnicity (proportion)         | 0.99*      | 0.99, 1.00 |
| Region: Midlands <sup>§</sup>                          | 0.64***    | 0.55, 0.76 |
| Region: London <sup>§</sup>                            | 0.56***    | 0.93, 0.98 |
| Region: South <sup>§</sup>                             | 0.48**     | 0.40, 0.58 |
| Minimum distance to hospital                           | 1.00       | 1.00, 1.00 |
| Rurality (Yes/No)                                      | 1.50**     | 1.18, 1.92 |
| Contract type (GMS/PMS)                                | 1.08       | 0.96, 1.23 |
| Dispensing Practice status (yes/no)                    | 1.10       | 0.88, 1.38 |
| Singlehanded practice (yes/no)                         | 0.53***    | 0.44, 0.63 |
| Training Practice status (yes/no)                      | 2.30***    | 1.99, 2.65 |
| *p< 0.05; **p< 0.01; ***p< 0.001                       |            |            |

<sup>1</sup> Odds ratios based on Standard Deviation units.

<sup>§</sup> Comparator Region: North

**Table 6: Ordered logistic models: effect of capitation funding on each CQC domain rating**

| Domains    | Odds Ratio <sup>1</sup> | 95% CI     |
|------------|-------------------------|------------|
| Caring     | 1.14**                  | 1.04, 1.23 |
| Effective  | 1.08*                   | 1.00, 1.16 |
| Responsive | 1.09*                   | 1.02, 1.17 |
| Safe       | 1.11*                   | 1.05, 1.18 |
| Well-led   | 1.13***                 | 1.06, 1.20 |
| Overall    | 1.13***                 | 1.06, 1.19 |

Adjusted for year effects, patient characteristics & practice characteristics &  
<sup>1</sup> Odds ratios based on Standard Deviation units.  
 \*p< 0.05; \*\*p< 0.01; \*\*\*p< 0.001

**Figure 1: Distribution of CQC ratings by each domain**

**Figure 2: Practice capitation funding by overall practice rating: 'Inadequate' versus 'Outstanding'**

**Figure 3: Estimated probability of overall practice rating of 'Outstanding' at various levels of capitation funding per registered patient**

**Figure 4: Estimated probability of overall practice rating of 'Inadequate' at various levels of capitation funding per registered patient**

**Figure 5: Estimated probability of 'Outstanding' overall practice CQC rating: training versus non-training practices**

**Figure 6: Estimated probability of 'Outstanding' overall practice CQC rating: single-handed versus group practices**

**Figure 7: Estimated probability of 'Outstanding' overall practice CQC rating: rural and urban practices**

## References:

1. Ham C, Berwick D, Dixon J. Improving quality in the English NHS: A strategy for action. London: The Kings Fund, 2016.
2. Department of Health. High Quality Care for All – NHS Next Stage Review Final Report. London: Department of Health, 2008.
3. Campbell S, Steiner A, Robison J, Weber D, Raven A, Roland M. Is the quality of care in general medical practice improving? Results of a longitudinal observational study. *Br J Gen Pract* 2003;53:298-304.
4. Llanwarne NR, Abel GA, Elliott MN, Paddison CAM, Lyrtzopoulos G, Campbell JL, et al. Relationship Between Clinical Quality and Patient Experience: Analysis of Data From the English Quality and Outcomes Framework and the National GP Patient Survey. *Annals of Family Medicine*. 2013;11(5):467-72.
5. Gillam S, Siriwardena A. Regulation in primary care. *Quality in Primary Care* 2014;22:57–61.
6. Emmert M, Eijkenaar F, Kemter H, Esslinger AS, Schoffski O. Economic evaluation of pay-for-performance in health care: a systematic review. *Eur J Health Econ*. 2012;13:755-67.
7. Kontopantelis E., Springate D. A., Ashworth M., Webb R. T., Buchan I. E., Doran T. Investigating the relationship between quality of primary care and premature mortality in England: a spatial whole-population study. *BMJ*. 2015;350:h904.
8. Campbell SM, Reeves D, Kontopantelis E, Sibbald B, Roland M. Effects of pay for performance on the quality of primary care in England. *NEJM*. 2009;361:368-78.
9. NHS Digital. NHS Payments to General Practice, England, 2016/17. 2017.
10. British Medical Association. Focus on the global sum allocation formula (Carr-Hill Formula): British Medical Association; 2015 [12th April 2016]. Available from: [https://www.google.co.uk/url?sa=t&rct=j&q=&esrc=s&source=web&cd=1&cad=rja&uact=8&ved=0ahUKewi\\_sLK47f\\_OAhWLAMAKHZ2bC8oQFggcMAA&url=https%3A%2F%2Fwww.bma.org.uk%2F%2Fmedia%2Ffiles%2Fpdfs%2Fpractical%2520advice%2520at%2520work%2Fcontracts%2Fgps%2Ffocus%2520on%2520global%2520sum%2520allocation%2520formula.pdf%3Fla%3Den&usg=AFQjCNEfYEp15cpvpLtT77blobeHfSmGMQ&sig2=ojUD-oKqav9bcLejniNdtw&bvm=bv.131783435,d.d2s](https://www.google.co.uk/url?sa=t&rct=j&q=&esrc=s&source=web&cd=1&cad=rja&uact=8&ved=0ahUKewi_sLK47f_OAhWLAMAKHZ2bC8oQFggcMAA&url=https%3A%2F%2Fwww.bma.org.uk%2F%2Fmedia%2Ffiles%2Fpdfs%2Fpractical%2520advice%2520at%2520work%2Fcontracts%2Fgps%2Ffocus%2520on%2520global%2520sum%2520allocation%2520formula.pdf%3Fla%3Den&usg=AFQjCNEfYEp15cpvpLtT77blobeHfSmGMQ&sig2=ojUD-oKqav9bcLejniNdtw&bvm=bv.131783435,d.d2s).
11. NHS Digital. General and Personal Medical Services, England: 2005-2015, as at 30 September, Provisional Experimental statistics. NHS Digital, 2016.
12. L'Esperance V, Sutton M, Schofield P, Round T, Malik U, White P, et al. Impact of primary care funding on secondary care utilisation and patient outcomes: a retrospective cross-sectional study of English general practice. *Br J Gen Pract*. 2017(DOI: <https://doi.org/10.3399/bjgp17X693101>).
13. Dunham AH, Dunbar JA, Johnson JK, Fuller J, Morgan M, Ford D. What attributions do Australian high-performing general practices make for their success? Applying the clinical microsystems framework: a qualitative study. *BMJ Open*. 2018;8(4):e020552.
14. Care Quality Commission. The state of care in general practice 2014 to 2017. London: Care Quality Commission, 2017.
15. Care Quality Commission. How CQC monitors, inspects and regulates NHS GP practices. London: Care Quality Commission, 2018.
16. NHS Digital. NHS Payments to General Practice, England: NHS Digital; 2015. Available from: <http://digital.nhs.uk/catalogue/PUB18468/nhspaymentsgp-14-15-ann1.xlsx>.
17. NHS Digital. General and Personal Medical Services: NHS Digital; 2016. Available from: <http://digital.nhs.uk/catalogue/PUB20503>.
18. Department for Communities and Local Government. English indices of deprivation 2015. Department for Communities and Local Government 2015.
19. NHS England. The GP Patient Survey. NHS England, 2015 July 2014 Report No.
20. Ashworth M, White P, Jongsma H, Schofield P, Armstrong D. Antibiotic prescribing and patient satisfaction in primary care in England: cross-sectional analysis of national patient survey data and prescribing data. *Br J Gen Pract*. 2016;66(42).



21. Office for National Statistics. 2011 Census: Office for National Statistics; 2011 [21st January 2016]. Available from: <https://www.ons.gov.uk/census/2011census>.
22. NHS Digital. NHS Payments to General Practice, England, 2013-14: Experimental Statistics – Report. Available from: 2015 [5th Sept 2015]. Available from: <http://www.hscic.gov.uk/catalogue/PUB16847/nhspaymentsgp-13-14-rep.docx>.
23. Ashworth M, Schofield P, Durbaba S, Ahluwalia S. Patient experience and the role of postgraduate GP training: a cross-sectional analysis of national Patient Survey data in England. *Br J Gen Pract*. 2014;64(620):168-77.
24. Lall R, Campbell MJ, Walters SJ, Morgan K. A review of ordinal regression models applied on health-related quality of life assessments. *Stat Methods Med Res*. 2002;11(I):49-67.
25. Brant R. Assessing proportionality in the proportional odds model for ordered logistic regression. *Biometrics*. 1990;46: 1171-8.
26. Roberts MJ, Campbell JL, Abel GA, al et. Understanding high and low patient experience scores in primary care: analysis of patients' survey data for general practices and individual doctors. *BMJ*. 2014;349:g6034.
27. Ashworth M, Armstrong D. The relationship between general practice characteristics and quality of care: a national survey of quality indicators used in the UK Quality and Outcomes Framework, 2004–5. *BMC Fam Pract*. 2006;7:68.
28. Murante AM, Seghieri C, Vainieri M, Schäfer WLA. Patient-perceived responsiveness of primary care systems across Europe and the relationship with the health expenditure and remuneration systems of primary care doctors. *Soc Sci Med*. 2017;185:139-47.
29. McLean G, Guthrie B, Mercer SW, Watt GC. General practice funding underpins the persistence of the inverse care law: cross-sectional study in Scotland. *Br J Gen Pract*. 2015; 65(641):799-805.
30. Levene L, Baker R, Wilson A, Walker N, Boomla K, Bankart M. Population health needs as predictors of variations in NHS practice payments: a cross-sectional study of English general practices in 2013–2014 and 2014–2015. *Br J Gen Pract*. 2016;67(654):e10-e9.
31. Mukhtar TK, Bankhead C, Stevens S, Perera R, Holt TA, Salisbury C, et al. Factors associated with consultation rates in general practice in England, 2013–2014: a cross-sectional study. *Br J Gen Pract* 2018;68(670):e370-e7.
32. Lyratzopoulos G, Elliott M, Barbieri JM, al et. Understanding ethnic and other socio-demographic differences in patient experience of primary care: evidence from the English General Practice Patient Survey. *BMJ Qual Saf*. 2012;21(1):21-9.
33. Bonciani M, Schäfer W, Barsanti S, Heinemann S, Groenewegen PP. The benefits of co-location in primary care practices: the perspectives of general practitioners and patients in 34 countries. *BMC Health Serv Res*. 2018 18(1):132.
34. Gosden T, Forland F, Kristiansen IS, Sutton M, Leese B, Giuffrida A, et al. Impact of payment method on behaviour of primary care physicians: a systematic review. *J Health Serv Res Policy*. 2001;6(1):44-55.
35. NHS England. The NHS Long Term Plan. NHS England, 2019.
36. Care Quality Commission. The five key questions we ask: Care Quality Commission; 2016 [12th April 2017]. Available from: <http://www.cqc.org.uk/content/five-key-questions-we-ask>.

1  
2  
3  
4  
5  
6  
7  
8  
9  
10  
11  
12  
13  
14  
15  
16  
17  
18  
19  
20  
21  
22  
23  
24  
25  
26  
27  
28  
29  
30  
31  
32  
33  
34  
35  
36  
37  
38  
39  
40  
41  
42  
43  
44  
45  
46  
47  
48  
49  
50  
51  
52  
53  
54  
55  
56  
57  
58  
59  
60

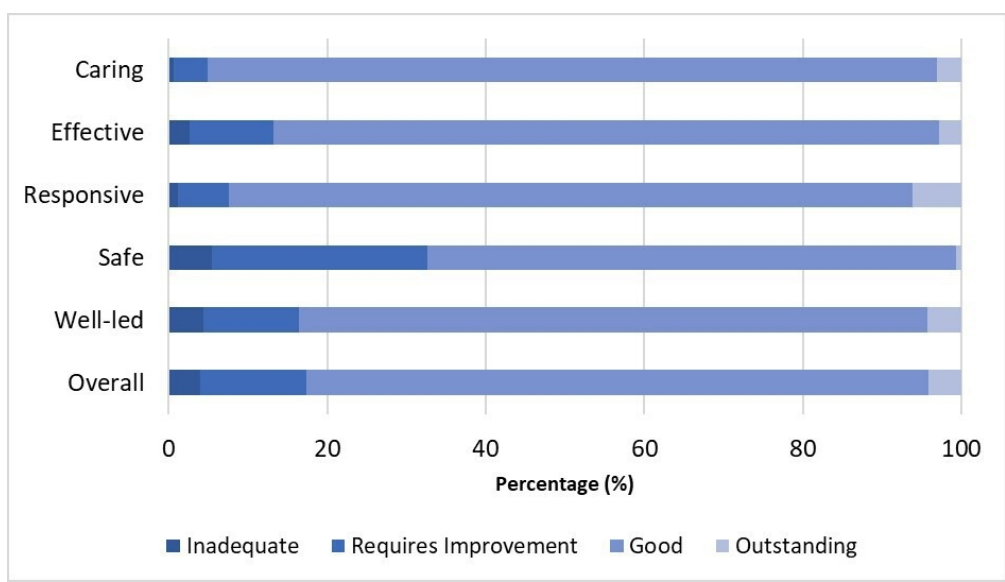

Figure 1 Distribution of CQC ratings by each domain

79x45mm (300 x 300 DPI)

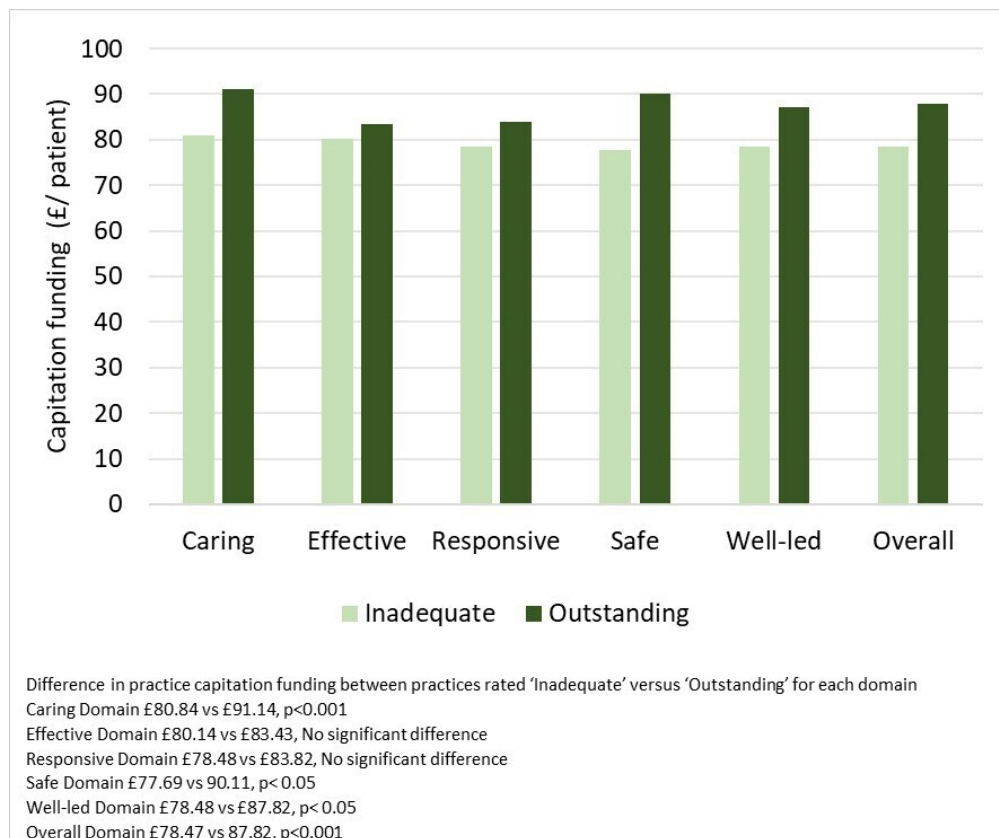

Figure 2 Practice capitation funding by overall practice rating 'Inadequate' versus 'Outstanding'

75x62mm (300 x 300 DPI)

1  
2  
3  
4  
5  
6  
7  
8  
9  
10  
11  
12  
13  
14  
15  
16  
17  
18  
19  
20  
21  
22  
23  
24  
25  
26  
27  
28  
29  
30  
31  
32  
33  
34  
35  
36  
37  
38  
39  
40  
41  
42  
43  
44  
45  
46  
47  
48  
49  
50  
51  
52  
53  
54  
55  
56  
57  
58  
59  
60

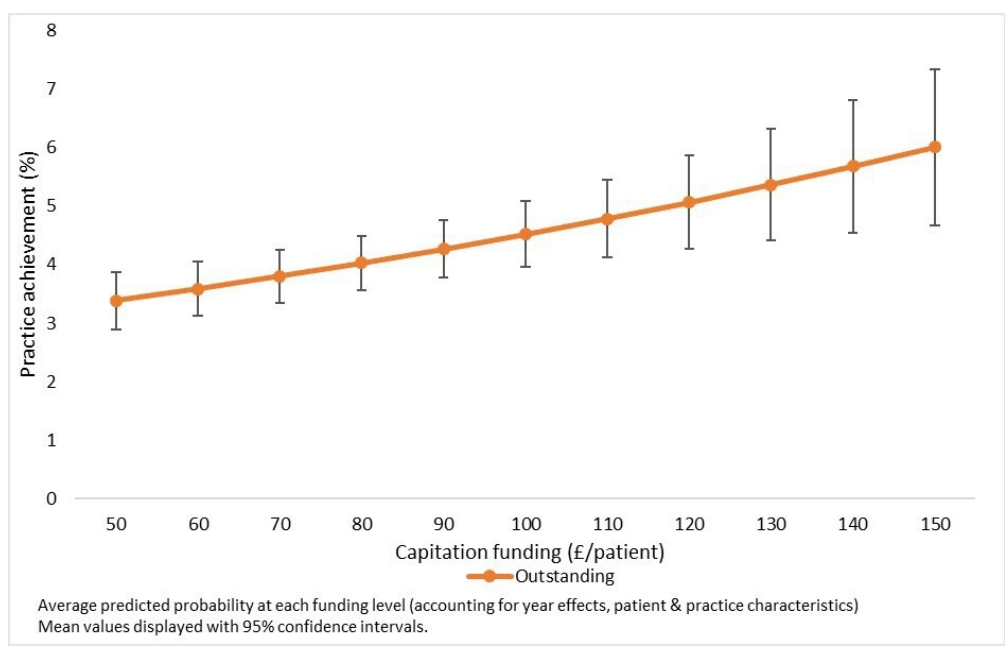

Figure 3 Estimated probability of overall practice rating of 'Outstanding' at various levels of capitation funding per registered patient

79x50mm (300 x 300 DPI)

1  
2  
3  
4  
5  
6  
7  
8  
9  
10  
11  
12  
13  
14  
15  
16  
17  
18  
19  
20  
21  
22  
23  
24  
25  
26  
27  
28  
29  
30  
31  
32  
33  
34  
35  
36  
37  
38  
39  
40  
41  
42  
43  
44  
45  
46  
47  
48  
49  
50  
51  
52  
53  
54  
55  
56  
57  
58  
59  
60

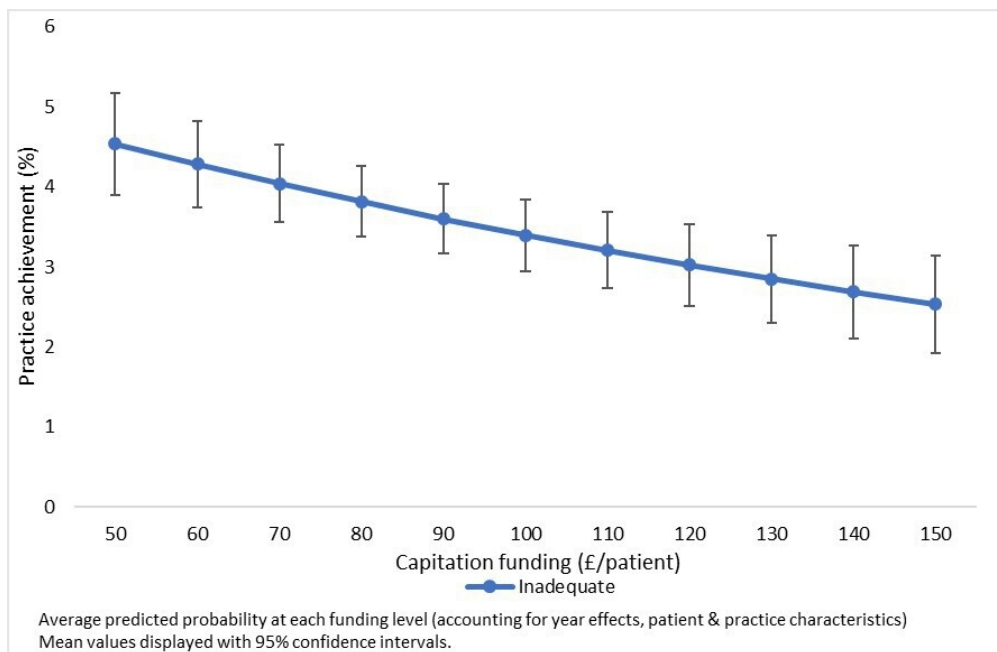

Figure 4 Estimated probability of overall practice rating of 'Inadequate' at various levels of capitation funding per registered patient

75x49mm (300 x 300 DPI)

1  
2  
3  
4  
5  
6  
7  
8  
9  
10  
11  
12  
13  
14  
15  
16  
17  
18  
19  
20  
21  
22  
23  
24  
25  
26  
27  
28  
29  
30  
31  
32  
33  
34  
35  
36  
37  
38  
39  
40  
41  
42  
43  
44  
45  
46  
47  
48  
49  
50  
51  
52  
53  
54  
55  
56  
57  
58  
59  
60

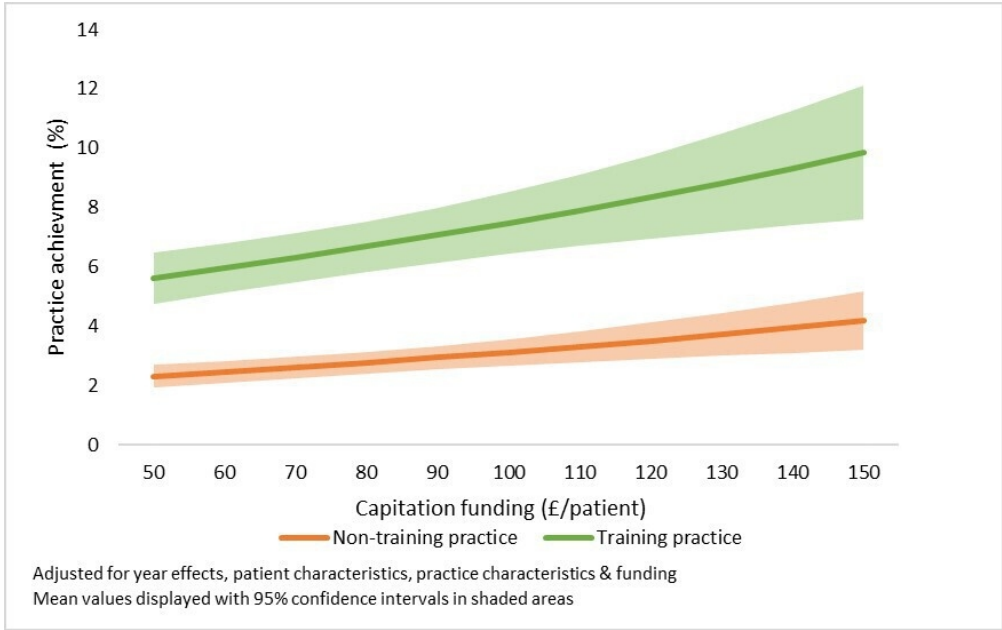

Figure 5 Estimated probability of 'Outstanding' overall practice CQC rating training versus non-training practices

73x46mm (300 x 300 DPI)

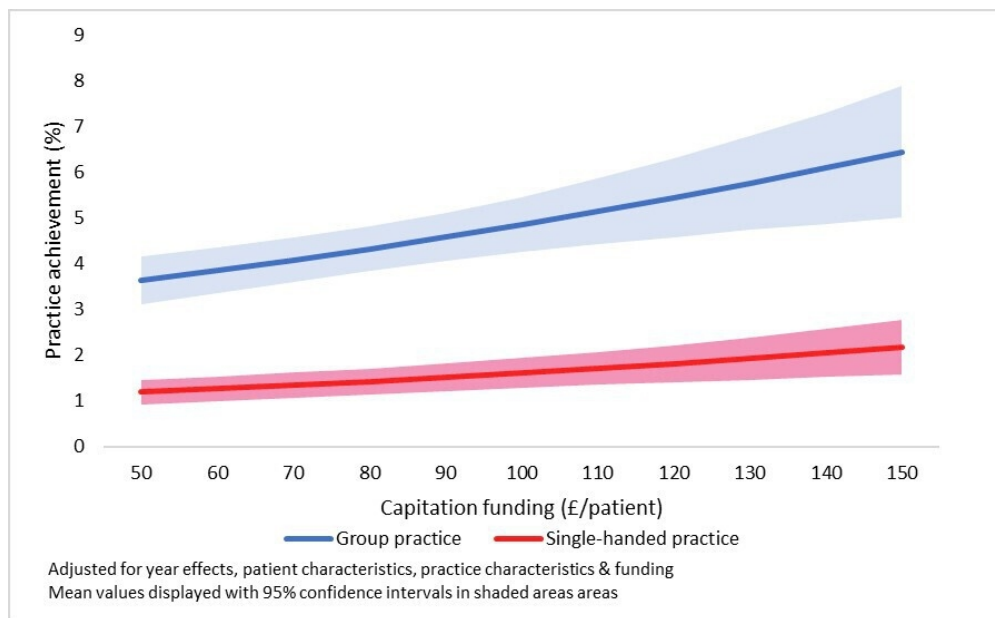

Figure 6 Estimated probability of 'Outstanding' overall practice CQC rating single-handed versus group practices

76x46mm (300 x 300 DPI)

1  
2  
3  
4  
5  
6  
7  
8  
9  
10  
11  
12  
13  
14  
15  
16  
17  
18  
19  
20  
21  
22  
23  
24  
25  
26  
27  
28  
29  
30  
31  
32  
33  
34  
35  
36  
37  
38  
39  
40  
41  
42  
43  
44  
45  
46  
47  
48  
49  
50  
51  
52  
53  
54  
55  
56  
57  
58  
59  
60

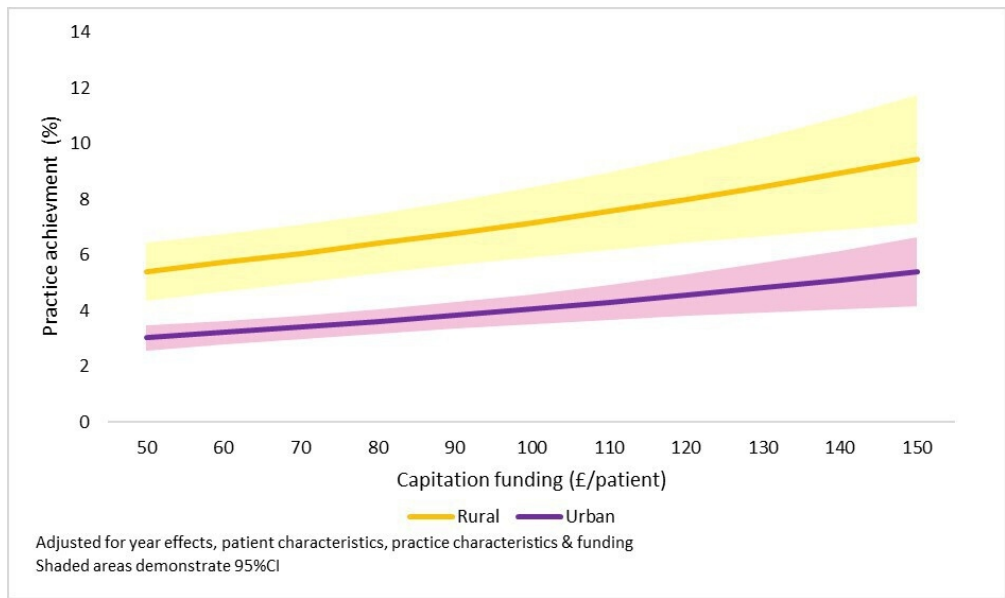

Figure 7 Estimated probability of 'Outstanding' overall practice CQC rating rural and urban practices

79x47mm (300 x 300 DPI)



## STROBE Statement—checklist of items that should be included in reports of observational studies

|                           | Item No. | Recommendation                                                                                                                                                                                                                                                                                                                                                                                                                                                         | Page No. | Relevant text from manuscript                                                                                            |
|---------------------------|----------|------------------------------------------------------------------------------------------------------------------------------------------------------------------------------------------------------------------------------------------------------------------------------------------------------------------------------------------------------------------------------------------------------------------------------------------------------------------------|----------|--------------------------------------------------------------------------------------------------------------------------|
| <b>Title and abstract</b> | 1        | (a) Indicate the study's design with a commonly used term in the title or the abstract                                                                                                                                                                                                                                                                                                                                                                                 | 1        | "Cross-sectional study"                                                                                                  |
|                           |          | (b) Provide in the abstract an informative and balanced summary of what was done and what was found                                                                                                                                                                                                                                                                                                                                                                    | 1        | Summarised in Abstract:<br>Design, Participants, Main outcome measures, Results                                          |
| <b>Introduction</b>       |          |                                                                                                                                                                                                                                                                                                                                                                                                                                                                        |          |                                                                                                                          |
| Background/rationale      | 2        | Explain the scientific background and rationale for the investigation being reported                                                                                                                                                                                                                                                                                                                                                                                   | 2-3      | The link between measured dimensions of quality and primary care funding data                                            |
| Objectives                | 3        | State specific objectives, including any prespecified hypotheses                                                                                                                                                                                                                                                                                                                                                                                                       | 3        | "we assess the relationship of practice capitation funding with overall CQC ratings and with the individual CQC domains" |
| <b>Methods</b>            |          |                                                                                                                                                                                                                                                                                                                                                                                                                                                                        |          |                                                                                                                          |
| Study design              | 4        | Present key elements of study design early in the paper                                                                                                                                                                                                                                                                                                                                                                                                                | 5        | Presented under 'Sample'.                                                                                                |
| Setting                   | 5        | Describe the setting, locations, and relevant dates, including periods of recruitment, exposure, follow-up, and data collection                                                                                                                                                                                                                                                                                                                                        | 3        | Presented under 'Data Sources'                                                                                           |
| Participants              | 6        | (a) <i>Cohort study</i> —Give the eligibility criteria, and the sources and methods of selection of participants. Describe methods of follow-up<br><i>Case-control study</i> —Give the eligibility criteria, and the sources and methods of case ascertainment and control selection. Give the rationale for the choice of cases and controls<br><i>Cross-sectional study</i> —Give the eligibility criteria, and the sources and methods of selection of participants | 5        | Cross-sectional study: general practice eligibility criteria summarised under 'Sample'                                   |
|                           |          | (b) <i>Cohort study</i> —For matched studies, give matching criteria and number of exposed and unexposed<br><i>Case-control study</i> —For matched studies, give matching criteria and the number of controls per case                                                                                                                                                                                                                                                 |          |                                                                                                                          |

|                              |    |                                                                                                                                                                                      |     |                                                                                                                                                                    |
|------------------------------|----|--------------------------------------------------------------------------------------------------------------------------------------------------------------------------------------|-----|--------------------------------------------------------------------------------------------------------------------------------------------------------------------|
| Variables                    | 7  | Clearly define all outcomes, exposures, predictors, potential confounders, and effect modifiers. Give diagnostic criteria, if applicable                                             | 4/5 | Practice variables summarised under the heading 'practice data'; funding variables summarised under the heading 'practice funding data'                            |
| Data sources/<br>measurement | 8* | For each variable of interest, give sources of data and details of methods of assessment (measurement). Describe comparability of assessment methods if there is more than one group | 3   | All sources of data listed under the heading, 'Data Sources'                                                                                                       |
| Bias                         | 9  | Describe any efforts to address potential sources of bias                                                                                                                            | 4   | The large no. of variables included in our regression model are designed to maximise the explanatory power of the model                                            |
| Study size                   | 10 | Explain how the study size was arrived at                                                                                                                                            | 5   | Included practices represent ALL practices, minus exclusions based on predetermined exclusion criteria. Only lack of data availability restricted the sample size. |

Continued on next page

For peer review only

|                        |     |                                                                                                                                                                                                                                                                                                           |     |                                                                                              |
|------------------------|-----|-----------------------------------------------------------------------------------------------------------------------------------------------------------------------------------------------------------------------------------------------------------------------------------------------------------|-----|----------------------------------------------------------------------------------------------|
| Quantitative variables | 11  | Explain how quantitative variables were handled in the analyses. If applicable, describe which groupings were chosen and why                                                                                                                                                                              | 5/6 | Quantitative variables analysed according to description in section headed, 'Data Analysis'. |
| Statistical methods    | 12  | (a) Describe all statistical methods, including those used to control for confounding                                                                                                                                                                                                                     | 5/6 | Regression modelling – see Data Analysis                                                     |
|                        |     | (b) Describe any methods used to examine subgroups and interactions                                                                                                                                                                                                                                       | 6   | Sub-groups such as 'outstanding' or 'inadequate' practices identified                        |
|                        |     | (c) Explain how missing data were addressed                                                                                                                                                                                                                                                               | 5/6 | Practices excluded if missing data                                                           |
|                        |     | (d) <i>Cohort study</i> —If applicable, explain how loss to follow-up was addressed<br><i>Case-control study</i> —If applicable, explain how matching of cases and controls was addressed<br><i>Cross-sectional study</i> —If applicable, describe analytical methods taking account of sampling strategy | n/a | The study was not a sample                                                                   |
|                        |     | (e) Describe any sensitivity analyses                                                                                                                                                                                                                                                                     | 8   | See heading 'Sensitivity analyses'                                                           |
| <b>Results</b>         |     |                                                                                                                                                                                                                                                                                                           |     |                                                                                              |
| Participants           | 13* | (a) Report numbers of individuals at each stage of study—eg numbers potentially eligible, examined for eligibility, confirmed eligible, included in the study, completing follow-up, and analysed                                                                                                         | 5   | Summarised under 'sample'. 7310 practices in England; 54 excluded.                           |
|                        |     | (b) Give reasons for non-participation at each stage                                                                                                                                                                                                                                                      | n/a | n/a (exclusion criteria stated above)                                                        |
|                        |     | (c) Consider use of a flow diagram                                                                                                                                                                                                                                                                        | n/a | Exclusion criteria summarised on pg5 without use of a Flow diagram                           |
| Descriptive data       | 14* | (a) Give characteristics of study participants (eg demographic, clinical, social) and information on exposures and potential confounders                                                                                                                                                                  | 13  | Table 2 summarises, 'Characteristics of general practices and their populations in England'  |
|                        |     | (b) Indicate number of participants with missing data for each variable of interest                                                                                                                                                                                                                       | n/a | Sample only included those with available data                                               |
|                        |     | (c) <i>Cohort study</i> —Summarise follow-up time (eg, average and total amount)                                                                                                                                                                                                                          | n/a |                                                                                              |
| Outcome data           | 15* | <i>Cohort study</i> —Report numbers of outcome events or summary measures over time                                                                                                                                                                                                                       | n/a |                                                                                              |
|                        |     | <i>Case-control study</i> —Report numbers in each exposure category, or summary measures of exposure                                                                                                                                                                                                      | n/a |                                                                                              |
|                        |     | <i>Cross-sectional study</i> —Report numbers of outcome events or summary measures                                                                                                                                                                                                                        | 13  | Summary measures in Table 2                                                                  |
| Main results           | 16  | (a) Give unadjusted estimates and, if applicable, confounder-adjusted estimates and their precision (eg, 95% confidence interval). Make clear which confounders were adjusted for and why they were included                                                                                              | 14  | Table 4 summarises 'unadjusted' and three levels of 'adjusted' analyses                      |

1  
2  
3  
4  
5  
6  
7  
8  
9

|  |                                                                                                                  |     |                                                          |
|--|------------------------------------------------------------------------------------------------------------------|-----|----------------------------------------------------------|
|  |                                                                                                                  | 15  | Confounders adjusted for are listed in Table 5           |
|  | (b) Report category boundaries when continuous variables were categorized                                        | n/a | No categorisation of continual variables                 |
|  | (c) If relevant, consider translating estimates of relative risk into absolute risk for a meaningful time period | n/a | Absolute financial values are presented in the findings. |

Continued on next page

10  
11  
12  
13  
14  
15  
16  
17  
18  
19  
20  
21  
22  
23  
24  
25  
26  
27  
28  
29  
30  
31  
32  
33  
34  
35  
36  
37  
38  
39  
40  
41  
42

For peer review only

43  
44  
45  
46

|                          |    |                                                                                                                                                                            |                       |                                                                                                                                                                                                                                   |
|--------------------------|----|----------------------------------------------------------------------------------------------------------------------------------------------------------------------------|-----------------------|-----------------------------------------------------------------------------------------------------------------------------------------------------------------------------------------------------------------------------------|
| Other analyses           | 17 | Report other analyses done—eg analyses of subgroups and interactions, and sensitivity analyses                                                                             | 8                     | Sensitivity analyses summarised                                                                                                                                                                                                   |
| <b>Discussion</b>        |    |                                                                                                                                                                            |                       |                                                                                                                                                                                                                                   |
| Key results              | 18 | Summarise key results with reference to study objectives                                                                                                                   | 9                     | Key finding summarised at opening of Discussion: ‘This study has demonstrated that higher capitation funding is associated with significantly higher overall practice quality ratings and ratings across all individual domains.’ |
| Limitations              | 19 | Discuss limitations of the study, taking into account sources of potential bias or imprecision. Discuss both direction and magnitude of any potential bias                 | 10                    | Discussed under heading, ‘Strengths and Weaknesses of the study’                                                                                                                                                                  |
| Interpretation           | 20 | Give a cautious overall interpretation of results considering objectives, limitations, multiplicity of analyses, results from similar studies, and other relevant evidence | 10/11                 | Cautious interpretation summarised with reference to the literature                                                                                                                                                               |
| Generalisability         | 21 | Discuss the generalisability (external validity) of the study results                                                                                                      | 11                    | Summarised under, ‘Implications for policy and practice’                                                                                                                                                                          |
| <b>Other information</b> |    |                                                                                                                                                                            |                       |                                                                                                                                                                                                                                   |
| Funding                  | 22 | Give the source of funding and the role of the funders for the present study and, if applicable, for the original study on which the present article is based              | In submission details | First author is funded as Doctoral Research Fellow (DRF) by NIHR                                                                                                                                                                  |

\*Give information separately for cases and controls in case-control studies and, if applicable, for exposed and unexposed groups in cohort and cross-sectional studies.

**Note:** An Explanation and Elaboration article discusses each checklist item and gives methodological background and published examples of transparent reporting. The STROBE checklist is best used in conjunction with this article (freely available on the Web sites of PLoS Medicine at <http://www.plosmedicine.org/>, Annals of Internal Medicine at <http://www.annals.org/>, and Epidemiology at <http://www.epidem.com/>). Information on the STROBE Initiative is available at [www.strobe-statement.org](http://www.strobe-statement.org).
